# Supplementary material for: Analysis of Dual Class I Histone Deacetylase and Lysine Demethylase Inhibitor Domatinostat (4SC-202) on Growth and Cellular and Genomic Landscape of Atypical Teratoid/Rhabdoid
Source: MDPI journal article supplement (doi:10.3390/cancers12030756), 2020-03-23
Supplement: s1 [file s1]

Archive with 7 entries (7 files):
- cancers-719592 supplementary figures.pdf
- File S2_Bulk_DAVID.xlsx
- File S3_SingleCell_DAVID.xlsx
- Video S1_NT Day 3.avi
- Video S2_DMSO Day 3.avi
- Video S3_20nM Day 3.avi
- Video S4_500uM Day 3.avi
