# Supplementary material for: Analysis of Dual Class I Histone Deacetylase and Lysine Demethylase Inhibitor Domatinostat (4SC-202) on Growth and Cellular and Genomic Landscape of Atypical Teratoid/Rhabdoid
Source: MDPI journal article supplement (doi:10.3390/cancers12030756), 2020-03-23
Supplement: s1 [file s1 › File S2_Bulk_DAVID.xlsx]

## Sheet: File S2_Bulk_DAVID
Annotation Cluster 1	Enrichment Score: 13.798780978539602
Category	Term	Count	%	PValue	Genes	List Total	Pop Hits	Pop Total	Fold Enrichment	Bonferroni	Benjamini	FDR
GOTERM_BP_DIRECT	GO:0006614~SRP-dependent cotranslational protein targeting to membrane	17	22.973	4.66478e-22	ENSG00000131469, ENSG00000174444, ENSG00000147604, ENSG00000105193, ENSG00000124614, ENSG00000105640, ENSG00000063177, ENSG00000197756, ENSG00000108298, ENSG00000177600, ENSG00000149273, ENSG00000142541, ENSG00000115268, ENSG00000162244, ENSG00000233927, ENSG00000198755, ENSG00000112306	71	94	16792	42.7726	3.35398e-19	3.35398e-19	7.05999e-19
GOTERM_BP_DIRECT	GO:0019083~viral transcription	17	22.973	9.12472e-21	ENSG00000131469, ENSG00000174444, ENSG00000147604, ENSG00000105193, ENSG00000124614, ENSG00000105640, ENSG00000063177, ENSG00000197756, ENSG00000108298, ENSG00000177600, ENSG00000149273, ENSG00000142541, ENSG00000115268, ENSG00000162244, ENSG00000233927, ENSG00000198755, ENSG00000112306	71	112	16792	35.8984	6.56067e-18	3.28034e-18	1.381e-17
GOTERM_BP_DIRECT	GO:0000184~nuclear-transcribed mRNA catabolic process, nonsense-mediated decay	17	22.973	2.52187e-20	ENSG00000131469, ENSG00000174444, ENSG00000147604, ENSG00000105193, ENSG00000124614, ENSG00000105640, ENSG00000063177, ENSG00000197756, ENSG00000108298, ENSG00000177600, ENSG00000149273, ENSG00000142541, ENSG00000115268, ENSG00000162244, ENSG00000233927, ENSG00000198755, ENSG00000112306	71	119	16792	33.7867	1.81322e-17	6.04407e-18	3.81676e-17
GOTERM_BP_DIRECT	GO:0006413~translational initiation	17	22.973	2.61703e-19	ENSG00000131469, ENSG00000174444, ENSG00000147604, ENSG00000105193, ENSG00000124614, ENSG00000105640, ENSG00000063177, ENSG00000197756, ENSG00000108298, ENSG00000177600, ENSG00000149273, ENSG00000142541, ENSG00000115268, ENSG00000162244, ENSG00000233927, ENSG00000198755, ENSG00000112306	71	137	16792	29.3476	1.88164e-16	4.70411e-17	3.96078e-16
UP_KEYWORDS	Ribosomal protein	17	22.973	3.08534e-18	ENSG00000131469, ENSG00000174444, ENSG00000147604, ENSG00000105193, ENSG00000124614, ENSG00000105640, ENSG00000063177, ENSG00000197756, ENSG00000108298, ENSG00000177600, ENSG00000149273, ENSG00000142541, ENSG00000115268, ENSG00000162244, ENSG00000233927, ENSG00000198755, ENSG00000112306	74	185	20581	25.5571	5.0291e-16	5.0291e-16	3.73733e-15
GOTERM_CC_DIRECT	GO:0005840~ribosome	16	21.6216	1.15867e-16	ENSG00000131469, ENSG00000174444, ENSG00000147604, ENSG00000105193, ENSG00000124614, ENSG00000105640, ENSG00000063177, ENSG00000197756, ENSG00000108298, ENSG00000177600, ENSG00000149273, ENSG00000142541, ENSG00000115268, ENSG00000162244, ENSG00000233927, ENSG00000198755	74	166	18224	23.7369	1.59872e-14	1.59872e-14	1.33227e-13
GOTERM_BP_DIRECT	GO:0006364~rRNA processing	17	22.973	3.58129e-16	ENSG00000131469, ENSG00000174444, ENSG00000147604, ENSG00000105193, ENSG00000124614, ENSG00000105640, ENSG00000063177, ENSG00000197756, ENSG00000108298, ENSG00000177600, ENSG00000149273, ENSG00000142541, ENSG00000115268, ENSG00000162244, ENSG00000233927, ENSG00000198755, ENSG00000112306	71	214	16792	18.7879	2.39475e-13	4.78506e-14	4.996e-13
GOTERM_MF_DIRECT	GO:0003735~structural constituent of ribosome	17	22.973	4.61731e-16	ENSG00000131469, ENSG00000174444, ENSG00000147604, ENSG00000105193, ENSG00000124614, ENSG00000105640, ENSG00000063177, ENSG00000197756, ENSG00000108298, ENSG00000177600, ENSG00000149273, ENSG00000142541, ENSG00000115268, ENSG00000162244, ENSG00000233927, ENSG00000198755, ENSG00000112306	70	222	16881	18.467	8.65974e-14	8.65974e-14	5.55112e-13
KEGG_PATHWAY	hsa03010:Ribosome	17	22.973	1.21379e-15	ENSG00000131469, ENSG00000174444, ENSG00000147604, ENSG00000105193, ENSG00000124614, ENSG00000105640, ENSG00000063177, ENSG00000197756, ENSG00000108298, ENSG00000177600, ENSG00000149273, ENSG00000142541, ENSG00000115268, ENSG00000162244, ENSG00000233927, ENSG00000198755, ENSG00000112306	53	136	6879	16.2241	1.05027e-13	1.05027e-13	1.32117e-12
GOTERM_BP_DIRECT	GO:0006412~translation	17	22.973	5.24923e-15	ENSG00000131469, ENSG00000174444, ENSG00000147604, ENSG00000105193, ENSG00000124614, ENSG00000105640, ENSG00000063177, ENSG00000197756, ENSG00000108298, ENSG00000177600, ENSG00000149273, ENSG00000142541, ENSG00000115268, ENSG00000162244, ENSG00000233927, ENSG00000198755, ENSG00000112306	71	253	16792	15.8918	3.75178e-12	6.25278e-13	7.89369e-12
UP_KEYWORDS	Ribonucleoprotein	17	22.973	5.60033e-15	ENSG00000131469, ENSG00000174444, ENSG00000147604, ENSG00000105193, ENSG00000124614, ENSG00000105640, ENSG00000063177, ENSG00000197756, ENSG00000108298, ENSG00000177600, ENSG00000149273, ENSG00000142541, ENSG00000115268, ENSG00000162244, ENSG00000233927, ENSG00000198755, ENSG00000112306	74	296	20581	15.9732	9.04832e-13	4.52416e-13	6.72795e-12
GOTERM_CC_DIRECT	GO:0022625~cytosolic large ribosomal subunit	11	14.8649	1.35435e-13	ENSG00000131469, ENSG00000174444, ENSG00000197756, ENSG00000108298, ENSG00000177600, ENSG00000142541, ENSG00000147604, ENSG00000162244, ENSG00000105640, ENSG00000063177, ENSG00000198755	74	68	18224	39.8378	1.95044e-11	4.8761e-12	1.60605e-10
GOTERM_CC_DIRECT	GO:0005925~focal adhesion	18	24.3243	1.80774e-13	ENSG00000131469, ENSG00000174444, ENSG00000126458, ENSG00000147604, ENSG00000105193, ENSG00000124614, ENSG00000106211, ENSG00000063177, ENSG00000137309, ENSG00000148180, ENSG00000197756, ENSG00000177600, ENSG00000108298, ENSG00000149273, ENSG00000142541, ENSG00000026025, ENSG00000115268, ENSG00000198755	74	391	18224	11.3373	2.60272e-11	5.20539e-12	2.14317e-10
GOTERM_MF_DIRECT	GO:0044822~poly(A) RNA binding	22	29.7297	2.18275e-09	ENSG00000131469, ENSG00000080824, ENSG00000174444, ENSG00000147604, ENSG00000204628, ENSG00000105193, ENSG00000124614, ENSG00000105640, ENSG00000106211, ENSG00000096384, ENSG00000197756, ENSG00000108298, ENSG00000149273, ENSG00000142541, ENSG00000115268, ENSG00000030582, ENSG00000102879, ENSG00000167658, ENSG00000162244, ENSG00000233927, ENSG00000198755, ENSG00000112306	70	1129	16881	4.69925	4.25636e-07	2.12818e-07	2.72451e-06
GOTERM_CC_DIRECT	GO:0016020~membrane	27	36.4865	1.64591e-07	ENSG00000131469, ENSG00000080824, ENSG00000174444, ENSG00000126458, ENSG00000062038, ENSG00000129226, ENSG00000130203, ENSG00000147604, ENSG00000105193, ENSG00000124614, ENSG00000087086, ENSG00000105640, ENSG00000063177, ENSG00000087088, ENSG00000096384, ENSG00000111640, ENSG00000108298, ENSG00000177600, ENSG00000142541, ENSG00000149273, ENSG00000115268, ENSG00000102879, ENSG00000167658, ENSG0000…	74	2200	18224	3.02241	2.37008e-05	3.38587e-06	0.00019516
GOTERM_MF_DIRECT	GO:0003723~RNA binding	11	14.8649	7.16217e-05	ENSG00000174444, ENSG00000108298, ENSG00000149273, ENSG00000147604, ENSG00000115268, ENSG00000162244, ENSG00000105193, ENSG00000233927, ENSG00000105640, ENSG00000063177, ENSG00000198755	70	547	16881	4.8496	0.0138697	0.0034856	0.0893614
GOTERM_CC_DIRECT	GO:0005730~nucleolus	10	13.5135	0.00705797	ENSG00000174444, ENSG00000108298, ENSG00000042493, ENSG00000149273, ENSG00000142541, ENSG00000147604, ENSG00000124614, ENSG00000124762, ENSG00000063177, ENSG00000198755	74	857	18224	2.87363	0.639387	0.0702631	8.0555
Annotation Cluster 2	Enrichment Score: 4.662180625396772
Category	Term	Count	%	PValue	Genes	List Total	Pop Hits	Pop Total	Fold Enrichment	Bonferroni	Benjamini	FDR
GOTERM_CC_DIRECT	GO:0022627~cytosolic small ribosomal subunit	6	8.10811	1.34382e-06	ENSG00000149273, ENSG00000115268, ENSG00000105193, ENSG00000124614, ENSG00000233927, ENSG00000112306	74	48	18224	30.7838	0.000193491	2.41884e-05	0.00159339
GOTERM_CC_DIRECT	GO:0015935~small ribosomal subunit	5	6.75676	3.87772e-06	ENSG00000149273, ENSG00000204628, ENSG00000115268, ENSG00000105193, ENSG00000233927	74	27	18224	45.6056	0.000558236	5.58377e-05	0.00459782
GOTERM_BP_DIRECT	GO:0042274~ribosomal small subunit biogenesis	3	4.05405	0.00197944	ENSG00000115268, ENSG00000105193, ENSG00000233927	71	16	16792	44.3451	0.759402	0.103796	2.95427
Annotation Cluster 3	Enrichment Score: 3.319202581201885
Category	Term	Count	%	PValue	Genes	List Total	Pop Hits	Pop Total	Fold Enrichment	Bonferroni	Benjamini	FDR
GOTERM_BP_DIRECT	GO:0006414~translational elongation	4	5.40541	5.41266e-05	ENSG00000177600, ENSG00000101210, ENSG00000167658, ENSG00000254772	71	18	16792	52.5571	0.0381705	0.00554429	0.0818874
UP_KEYWORDS	Elongation factor	4	5.40541	0.000162256	ENSG00000103363, ENSG00000101210, ENSG00000167658, ENSG00000254772	74	30	20581	37.0829	0.0261032	0.00527601	0.196367
GOTERM_MF_DIRECT	GO:0003746~translation elongation factor activity	4	5.40541	0.000357152	ENSG00000103363, ENSG00000101210, ENSG00000167658, ENSG00000254772	70	34	16881	28.3714	0.0672865	0.0138348	0.444884
UP_KEYWORDS	Protein biosynthesis	4	5.40541	0.0168548	ENSG00000103363, ENSG00000101210, ENSG00000167658, ENSG00000254772	74	152	20581	7.31899	0.937385	0.150397	18.609
Annotation Cluster 4	Enrichment Score: 2.391125635498819
Category	Term	Count	%	PValue	Genes	List Total	Pop Hits	Pop Total	Fold Enrichment	Bonferroni	Benjamini	FDR
GOTERM_CC_DIRECT	GO:0005913~cell-cell adherens junction	7	9.45946	0.0018596	ENSG00000096384, ENSG00000062038, ENSG00000042493, ENSG00000204628, ENSG00000167658, ENSG00000162244, ENSG00000254772	74	323	18224	5.33713	0.235116	0.0204067	2.18285
GOTERM_BP_DIRECT	GO:0098609~cell-cell adhesion	6	8.10811	0.00543791	ENSG00000096384, ENSG00000042493, ENSG00000204628, ENSG00000167658, ENSG00000162244, ENSG00000254772	71	271	16792	5.23632	0.980169	0.178009	7.92121
GOTERM_MF_DIRECT	GO:0098641~cadherin binding involved in cell-cell adhesion	6	8.10811	0.00663395	ENSG00000096384, ENSG00000042493, ENSG00000204628, ENSG00000167658, ENSG00000162244, ENSG00000254772	70	290	16881	4.98946	0.726904	0.134298	7.97232
Annotation Cluster 5	Enrichment Score: 2.1627088439855564
Category	Term	Count	%	PValue	Genes	List Total	Pop Hits	Pop Total	Fold Enrichment	Bonferroni	Benjamini	FDR
UP_KEYWORDS	S-nitrosylation	5	6.75676	4.0279e-05	ENSG00000080824, ENSG00000096384, ENSG00000111640, ENSG00000160678, ENSG00000026025	74	54	20581	25.752	0.0065441	0.00164006	0.0487798
GOTERM_MF_DIRECT	GO:0042802~identical protein binding	8	10.8108	0.0328736	ENSG00000080824, ENSG00000111640, ENSG00000160678, ENSG00000130203, ENSG00000026025, ENSG00000087086, ENSG00000106211, ENSG00000087088	70	749	16881	2.57578	0.998523	0.352437	34.1126
GOTERM_CC_DIRECT	GO:0043005~neuron projection	3	4.05405	0.245442	ENSG00000080824, ENSG00000160678, ENSG00000026025	74	237	18224	3.11735	1	0.815432	96.4538
Annotation Cluster 6	Enrichment Score: 1.556732778035057
Category	Term	Count	%	PValue	Genes	List Total	Pop Hits	Pop Total	Fold Enrichment	Bonferroni	Benjamini	FDR
GOTERM_MF_DIRECT	GO:0008289~lipid binding	5	6.75676	0.00338893	ENSG00000197746, ENSG00000100979, ENSG00000130203, ENSG00000103202, ENSG00000087088	70	151	16881	7.98534	0.484162	0.0902324	4.14872
GOTERM_BP_DIRECT	GO:0006869~lipid transport	4	5.40541	0.00392362	ENSG00000197746, ENSG00000100979, ENSG00000130203, ENSG00000103202	71	76	16792	12.4477	0.940788	0.171752	5.7764
UP_KEYWORDS	Lipid transport	3	4.05405	0.0456907	ENSG00000100979, ENSG00000130203, ENSG00000103202	74	96	20581	8.6913	0.999511	0.316928	43.2494
UP_KEYWORDS	Transport	4	5.40541	0.976094	ENSG00000100979, ENSG00000130203, ENSG00000103202, ENSG00000162878	74	1978	20581	0.56243	1	0.99999	100
Annotation Cluster 7	Enrichment Score: 1.5488268981503919
Category	Term	Count	%	PValue	Genes	List Total	Pop Hits	Pop Total	Fold Enrichment	Bonferroni	Benjamini	FDR
GOTERM_BP_DIRECT	GO:0006986~response to unfolded protein	3	4.05405	0.0132457	ENSG00000080824, ENSG00000096384, ENSG00000106211	71	42	16792	16.8934	0.999931	0.308397	18.2749
UP_KEYWORDS	Chaperone	4	5.40541	0.0346637	ENSG00000080824, ENSG00000096384, ENSG00000106211, ENSG00000151835	74	201	20581	5.53476	0.996819	0.261146	34.7757
UP_KEYWORDS	Stress response	3	4.05405	0.049155	ENSG00000080824, ENSG00000096384, ENSG00000106211	74	100	20581	8.34365	0.99973	0.311644	45.6951
Annotation Cluster 8	Enrichment Score: 1.4710709821346473
Category	Term	Count	%	PValue	Genes	List Total	Pop Hits	Pop Total	Fold Enrichment	Bonferroni	Benjamini	FDR
GOTERM_BP_DIRECT	GO:0009651~response to salt stress	3	4.05405	0.000605144	ENSG00000080824, ENSG00000096384, ENSG00000087088	71	9	16792	78.8357	0.352884	0.0425895	0.911959
KEGG_PATHWAY	hsa05200:Pathways in cancer	6	8.10811	0.174001	ENSG00000080824, ENSG00000096384, ENSG00000105976, ENSG00000103363, ENSG00000124762, ENSG00000087088	53	393	6879	1.98156	1	0.871905	87.2718
KEGG_PATHWAY	hsa04141:Protein processing in endoplasmic reticulum	3	4.05405	0.366756	ENSG00000080824, ENSG00000096384, ENSG00000087088	53	169	6879	2.30401	1	0.962162	99.2751
Annotation Cluster 9	Enrichment Score: 1.4579776389370191
Category	Term	Count	%	PValue	Genes	List Total	Pop Hits	Pop Total	Fold Enrichment	Bonferroni	Benjamini	FDR
INTERPRO	IPR003594:Histidine kinase-like ATPase, ATP-binding domain	3	4.05405	0.00705711	ENSG00000080824, ENSG00000096384, ENSG00000151835	72	33	18559	23.4331	0.7724	0.522925	8.55264
UP_KEYWORDS	Chaperone	4	5.40541	0.0346637	ENSG00000080824, ENSG00000096384, ENSG00000106211, ENSG00000151835	74	201	20581	5.53476	0.996819	0.261146	34.7757
GOTERM_BP_DIRECT	GO:0006457~protein folding	3	4.05405	0.172808	ENSG00000080824, ENSG00000096384, ENSG00000151835	71	180	16792	3.94178	1	0.951747	94.3377
Annotation Cluster 10	Enrichment Score: 1.429290719503388
Category	Term	Count	%	PValue	Genes	List Total	Pop Hits	Pop Total	Fold Enrichment	Bonferroni	Benjamini	FDR
UP_KEYWORDS	Methylation	12	16.2162	0.000762848	ENSG00000137309, ENSG00000155366, ENSG00000174444, ENSG00000111640, ENSG00000126458, ENSG00000196230, ENSG00000149273, ENSG00000101210, ENSG00000167658, ENSG00000162244, ENSG00000124614, ENSG00000106211	74	1001	20581	3.33413	0.116966	0.0137262	0.920145
GOTERM_MF_DIRECT	GO:0005525~GTP binding	7	9.45946	0.00478322	ENSG00000155366, ENSG00000080824, ENSG00000096384, ENSG00000126458, ENSG00000196230, ENSG00000101210, ENSG00000167658	70	384	16881	4.39609	0.607401	0.1103	5.80917
UP_SEQ_FEATURE	nucleotide phosphate-binding region:GTP	5	6.75676	0.0264715	ENSG00000155366, ENSG00000126458, ENSG00000196230, ENSG00000101210, ENSG00000167658	74	310	20063	4.37293	0.998122	0.998122	29.1705
UP_KEYWORDS	GTP-binding	5	6.75676	0.0336197	ENSG00000155366, ENSG00000126458, ENSG00000196230, ENSG00000101210, ENSG00000167658	74	343	20581	4.05425	0.996206	0.266318	33.916
GOTERM_MF_DIRECT	GO:0003924~GTPase activity	4	5.40541	0.0708046	ENSG00000126458, ENSG00000196230, ENSG00000101210, ENSG00000167658	70	234	16881	4.12234	0.999999	0.511299	60.0136
INTERPRO	IPR005225:Small GTP-binding protein domain	3	4.05405	0.134067	ENSG00000155366, ENSG00000126458, ENSG00000167658	72	167	18559	4.63049	1	0.999956	83.7527
UP_KEYWORDS	Nucleotide-binding	10	13.5135	0.180808	ENSG00000155366, ENSG00000080824, ENSG00000096384, ENSG00000126458, ENSG00000196230, ENSG00000105976, ENSG00000101210, ENSG00000103202, ENSG00000167658, ENSG00000162878	74	1788	20581	1.55549	1	0.70001	91.0705
INTERPRO	IPR027417:P-loop containing nucleoside triphosphate hydrolase	4	5.40541	0.659997	ENSG00000155366, ENSG00000126458, ENSG00000101210, ENSG00000167658	72	879	18559	1.17299	1	1	99.9999
Annotation Cluster 11	Enrichment Score: 1.341803339115954
Category	Term	Count	%	PValue	Genes	List Total	Pop Hits	Pop Total	Fold Enrichment	Bonferroni	Benjamini	FDR
GOTERM_BP_DIRECT	GO:0061621~canonical glycolysis	3	4.05405	0.00521875	ENSG00000111640, ENSG00000108515, ENSG00000111674	71	26	16792	27.2893	0.976765	0.179635	7.61365
UP_KEYWORDS	Glycolysis	3	4.05405	0.00539881	ENSG00000111640, ENSG00000108515, ENSG00000111674	74	31	20581	26.915	0.586207	0.0770841	6.34702
KEGG_PATHWAY	hsa04066:HIF-1 signaling pathway	5	6.75676	0.0057796	ENSG00000111640, ENSG00000103363, ENSG00000108515, ENSG00000124762, ENSG00000111674	53	96	6879	6.76002	0.392551	0.22061	6.05907
GOTERM_BP_DIRECT	GO:0006096~glycolytic process	3	4.05405	0.00881718	ENSG00000111640, ENSG00000108515, ENSG00000111674	71	34	16792	20.8683	0.998284	0.233039	12.5442
GOTERM_BP_DIRECT	GO:0006094~gluconeogenesis	3	4.05405	0.0144759	ENSG00000111640, ENSG00000108515, ENSG00000111674	71	44	16792	16.1255	0.999972	0.321794	19.8034
KEGG_PATHWAY	hsa01130:Biosynthesis of antibiotics	5	6.75676	0.0753865	ENSG00000111640, ENSG00000105655, ENSG00000103202, ENSG00000108515, ENSG00000111674	53	212	6879	3.06114	0.998818	0.894271	57.0524
KEGG_PATHWAY	hsa00010:Glycolysis / Gluconeogenesis	3	4.05405	0.0908435	ENSG00000111640, ENSG00000108515, ENSG00000111674	53	67	6879	5.8116	0.999723	0.870958	64.1914
KEGG_PATHWAY	hsa01230:Biosynthesis of amino acids	3	4.05405	0.102586	ENSG00000111640, ENSG00000108515, ENSG00000111674	53	72	6879	5.40802	0.999909	0.844592	68.8753
KEGG_PATHWAY	hsa01200:Carbon metabolism	3	4.05405	0.210128	ENSG00000111640, ENSG00000108515, ENSG00000111674	53	113	6879	3.44582	1	0.895023	92.1418
UP_KEYWORDS	Magnesium	3	4.05405	0.586548	ENSG00000103202, ENSG00000108515, ENSG00000111674	74	552	20581	1.51153	1	0.985509	99.9977
KEGG_PATHWAY	hsa01100:Metabolic pathways	6	8.10811	0.965966	ENSG00000111640, ENSG00000105655, ENSG00000103202, ENSG00000158104, ENSG00000108515, ENSG00000111674	53	1219	6879	0.638847	1	1	100
Annotation Cluster 12	Enrichment Score: 0.6286686554177423
Category	Term	Count	%	PValue	Genes	List Total	Pop Hits	Pop Total	Fold Enrichment	Bonferroni	Benjamini	FDR
GOTERM_BP_DIRECT	GO:0045668~negative regulation of osteoblast differentiation	3	4.05405	0.0114914	ENSG00000125931, ENSG00000125968, ENSG00000117318	71	39	16792	18.1928	0.999754	0.282805	16.0481
GOTERM_MF_DIRECT	GO:0008134~transcription factor binding	5	6.75676	0.0288986	ENSG00000137309, ENSG00000125968, ENSG00000149273, ENSG00000117318, ENSG00000130522	70	284	16881	4.24572	0.996715	0.355877	30.6516
GOTERM_BP_DIRECT	GO:0007623~circadian rhythm	3	4.05405	0.0391058	ENSG00000125968, ENSG00000117318, ENSG00000130522	71	75	16792	9.46028	1	0.569831	45.3235
GOTERM_MF_DIRECT	GO:0019899~enzyme binding	4	5.40541	0.155334	ENSG00000137309, ENSG00000149273, ENSG00000130522, ENSG00000204628	70	333	16881	2.89678	1	0.776045	87.8415
GOTERM_BP_DIRECT	GO:0000122~negative regulation of transcription from RNA polymerase II promoter	6	8.10811	0.180862	ENSG00000125968, ENSG00000160678, ENSG00000105722, ENSG00000117318, ENSG00000130522, ENSG00000159388	71	720	16792	1.97089	1	0.955769	95.117
GOTERM_BP_DIRECT	GO:0045892~negative regulation of transcription, DNA-templated	4	5.40541	0.345346	ENSG00000137309, ENSG00000125931, ENSG00000125968, ENSG00000117318	71	499	16792	1.89585	1	0.997452	99.8358
GOTERM_MF_DIRECT	GO:0003700~transcription factor activity, sequence-specific DNA binding	6	8.10811	0.356576	ENSG00000137309, ENSG00000125931, ENSG00000125968, ENSG00000105722, ENSG00000117318, ENSG00000130522	70	961	16881	1.50566	1	0.9722	99.5929
UP_KEYWORDS	Transcription regulation	9	12.1622	0.594921	ENSG00000137309, ENSG00000125931, ENSG00000125968, ENSG00000103363, ENSG00000149273, ENSG00000105722, ENSG00000117318, ENSG00000130522, ENSG00000159388	74	2332	20581	1.07337	1	0.983288	99.9982
UP_KEYWORDS	Repressor	3	4.05405	0.624956	ENSG00000125968, ENSG00000105722, ENSG00000117318	74	592	20581	1.4094	1	0.985105	99.9993
UP_KEYWORDS	Transcription	9	12.1622	0.627641	ENSG00000137309, ENSG00000125931, ENSG00000125968, ENSG00000103363, ENSG00000149273, ENSG00000105722, ENSG00000117318, ENSG00000130522, ENSG00000159388	74	2398	20581	1.04383	1	0.9839	99.9994
UP_KEYWORDS	Nucleus	18	24.3243	0.708686	ENSG00000125931, ENSG00000103363, ENSG00000042493, ENSG00000101210, ENSG00000197956, ENSG00000204628, ENSG00000124614, ENSG00000106211, ENSG00000103145, ENSG00000137309, ENSG00000111640, ENSG00000125968, ENSG00000149273, ENSG00000105722, ENSG00000117318, ENSG00000130522, ENSG00000167658, ENSG00000124762	74	5244	20581	0.954651	1	0.991659	100
GOTERM_BP_DIRECT	GO:0006351~transcription, DNA-templated	6	8.10811	0.922104	ENSG00000125931, ENSG00000125968, ENSG00000149273, ENSG00000105722, ENSG00000117318, ENSG00000159388	71	1955	16792	0.725853	1	1	100
UP_KEYWORDS	DNA-binding	4	5.40541	0.980703	ENSG00000137309, ENSG00000149273, ENSG00000105722, ENSG00000130522	74	2050	20581	0.542676	1	0.999993	100
Annotation Cluster 13	Enrichment Score: 0.5776930328110117
Category	Term	Count	%	PValue	Genes	List Total	Pop Hits	Pop Total	Fold Enrichment	Bonferroni	Benjamini	FDR
GOTERM_BP_DIRECT	GO:0050821~protein stabilization	4	5.40541	0.0191755	ENSG00000080824, ENSG00000096384, ENSG00000111640, ENSG00000124762	71	136	16792	6.95609	0.999999	0.391758	25.4003
GOTERM_BP_DIRECT	GO:0018108~peptidyl-tyrosine phosphorylation	3	4.05405	0.133673	ENSG00000080824, ENSG00000105976, ENSG00000162878	71	153	16792	4.63739	1	0.904135	88.6019
KEGG_PATHWAY	hsa05215:Prostate cancer	3	4.05405	0.142606	ENSG00000080824, ENSG00000096384, ENSG00000124762	53	88	6879	4.42474	0.999998	0.848965	80.9688
KEGG_PATHWAY	hsa05200:Pathways in cancer	6	8.10811	0.174001	ENSG00000080824, ENSG00000096384, ENSG00000105976, ENSG00000103363, ENSG00000124762, ENSG00000087088	53	393	6879	1.98156	1	0.871905	87.2718
KEGG_PATHWAY	hsa04151:PI3K-Akt signaling pathway	5	6.75676	0.263071	ENSG00000080824, ENSG00000168209, ENSG00000096384, ENSG00000105976, ENSG00000124762	53	345	6879	1.88105	1	0.908059	96.2811
GOTERM_CC_DIRECT	GO:0009986~cell surface	4	5.40541	0.370283	ENSG00000080824, ENSG00000096384, ENSG00000105976, ENSG00000035862	74	542	18224	1.81749	1	0.915126	99.5847
UP_KEYWORDS	Kinase	4	5.40541	0.486355	ENSG00000105976, ENSG00000103202, ENSG00000162878, ENSG00000124762	74	735	20581	1.51359	1	0.966411	99.9687
UP_KEYWORDS	ATP-binding	5	6.75676	0.735782	ENSG00000080824, ENSG00000096384, ENSG00000105976, ENSG00000103202, ENSG00000162878	74	1391	20581	0.999718	1	0.993561	100
UP_KEYWORDS	Transferase	5	6.75676	0.865644	ENSG00000111640, ENSG00000105976, ENSG00000103202, ENSG00000162878, ENSG00000124762	74	1708	20581	0.814173	1	0.998904	100
GOTERM_MF_DIRECT	GO:0005524~ATP binding	5	6.75676	0.870848	ENSG00000080824, ENSG00000096384, ENSG00000105976, ENSG00000103202, ENSG00000162878	70	1495	16881	0.806546	1	1	100
Annotation Cluster 14	Enrichment Score: 0.4090617344541573
Category	Term	Count	%	PValue	Genes	List Total	Pop Hits	Pop Total	Fold Enrichment	Bonferroni	Benjamini	FDR
GOTERM_CC_DIRECT	GO:0005615~extracellular space	11	14.8649	0.0416354	ENSG00000197746, ENSG00000147571, ENSG00000148180, ENSG00000100979, ENSG00000130203, ENSG00000030582, ENSG00000108515, ENSG00000106211, ENSG00000130513, ENSG00000111674, ENSG00000035862	74	1347	18224	2.01112	0.99781	0.318012	39.6044
GOTERM_CC_DIRECT	GO:0005576~extracellular region	11	14.8649	0.107836	ENSG00000197746, ENSG00000080824, ENSG00000147571, ENSG00000148180, ENSG00000196230, ENSG00000105976, ENSG00000100979, ENSG00000130203, ENSG00000162878, ENSG00000130513, ENSG00000035862	74	1610	18224	1.68259	1	0.560254	74.1531
UP_KEYWORDS	Secreted	11	14.8649	0.155598	ENSG00000197746, ENSG00000147571, ENSG00000148180, ENSG00000105976, ENSG00000042493, ENSG00000100979, ENSG00000130203, ENSG00000030582, ENSG00000162878, ENSG00000130513, ENSG00000035862	74	1965	20581	1.55691	1	0.668028	87.1093
UP_SEQ_FEATURE	signal peptide	13	17.5676	0.570703	ENSG00000105976, ENSG00000062038, ENSG00000129226, ENSG00000130203, ENSG00000107798, ENSG00000197746, ENSG00000148180, ENSG00000147571, ENSG00000100979, ENSG00000030582, ENSG00000130513, ENSG00000249992, ENSG00000035862	74	3346	20063	1.05337	1	1	99.9981
UP_KEYWORDS	Signal	14	18.9189	0.739385	ENSG00000105976, ENSG00000062038, ENSG00000129226, ENSG00000130203, ENSG00000107798, ENSG00000197746, ENSG00000148180, ENSG00000147571, ENSG00000100979, ENSG00000030582, ENSG00000162878, ENSG00000130513, ENSG00000249992, ENSG00000035862	74	4160	20581	0.935986	1	0.993137	100
UP_KEYWORDS	Glycoprotein	15	20.2703	0.768675	ENSG00000155366, ENSG00000105976, ENSG00000062038, ENSG00000129226, ENSG00000130203, ENSG00000107798, ENSG00000197746, ENSG00000096384, ENSG00000100979, ENSG00000026025, ENSG00000030582, ENSG00000129951, ENSG00000162878, ENSG00000130513, ENSG00000249992	74	4551	20581	0.916683	1	0.994414	100
UP_SEQ_FEATURE	disulfide bond	7	9.45946	0.96422	ENSG00000197746, ENSG00000148180, ENSG00000100979, ENSG00000129226, ENSG00000030582, ENSG00000130513, ENSG00000035862	74	2917	20063	0.650618	1	1	100
UP_KEYWORDS	Disulfide bond	8	10.8108	0.970522	ENSG00000197746, ENSG00000148180, ENSG00000105976, ENSG00000100979, ENSG00000129226, ENSG00000030582, ENSG00000130513, ENSG00000035862	74	3434	20581	0.647925	1	0.999984	100
UP_SEQ_FEATURE	glycosylation site:N-linked (GlcNAc...)	10	13.5135	0.981767	ENSG00000197746, ENSG00000105976, ENSG00000062038, ENSG00000100979, ENSG00000129226, ENSG00000107798, ENSG00000030582, ENSG00000129951, ENSG00000130513, ENSG00000249992	74	4234	20063	0.640344	1	1	100
Annotation Cluster 15	Enrichment Score: 0.0036007356400866576
Category	Term	Count	%	PValue	Genes	List Total	Pop Hits	Pop Total	Fold Enrichment	Bonferroni	Benjamini	FDR
UP_KEYWORDS	Membrane	21	28.3784	0.960194	ENSG00000175130, ENSG00000155366, ENSG00000080824, ENSG00000126458, ENSG00000105976, ENSG00000062038, ENSG00000129226, ENSG00000197956, ENSG00000103202, ENSG00000204628, ENSG00000087088, ENSG00000111674, ENSG00000137309, ENSG00000111640, ENSG00000125995, ENSG00000149273, ENSG00000174307, ENSG00000102879, ENSG00000129951, ENSG00000170290, ENSG00000249992	74	7494	20581	0.779364	1	0.999966	100
GOTERM_CC_DIRECT	GO:0016021~integral component of membrane	10	13.5135	0.999696	ENSG00000137309, ENSG00000197746, ENSG00000125995, ENSG00000105976, ENSG00000062038, ENSG00000129226, ENSG00000129951, ENSG00000087088, ENSG00000249992, ENSG00000170290	74	5163	18224	0.476991	1	1	100
UP_SEQ_FEATURE	transmembrane region	8	10.8108	0.999798	ENSG00000125995, ENSG00000105976, ENSG00000062038, ENSG00000129226, ENSG00000129951, ENSG00000087088, ENSG00000249992, ENSG00000170290	74	5056	20063	0.42899	1	1	100
UP_KEYWORDS	Transmembrane helix	9	12.1622	0.999831	ENSG00000137309, ENSG00000125995, ENSG00000105976, ENSG00000062038, ENSG00000129226, ENSG00000129951, ENSG00000087088, ENSG00000249992, ENSG00000170290	74	5634	20581	0.444284	1	1	100
UP_KEYWORDS	Transmembrane	9	12.1622	0.99984	ENSG00000137309, ENSG00000125995, ENSG00000105976, ENSG00000062038, ENSG00000129226, ENSG00000129951, ENSG00000087088, ENSG00000249992, ENSG00000170290	74	5651	20581	0.442947	1	1	100
Annotation Cluster 16	Enrichment Score: 6.453316686448626E-5
Category	Term	Count	%	PValue	Genes	List Total	Pop Hits	Pop Total	Fold Enrichment	Bonferroni	Benjamini	FDR
UP_SEQ_FEATURE	topological domain:Extracellular	3	4.05405	0.999772	ENSG00000105976, ENSG00000062038, ENSG00000129226	74	2787	20063	0.291842	1	1	100
UP_SEQ_FEATURE	transmembrane region	8	10.8108	0.999798	ENSG00000125995, ENSG00000105976, ENSG00000062038, ENSG00000129226, ENSG00000129951, ENSG00000087088, ENSG00000249992, ENSG00000170290	74	5056	20063	0.42899	1	1	100
UP_SEQ_FEATURE	topological domain:Cytoplasmic	3	4.05405	0.999984	ENSG00000105976, ENSG00000062038, ENSG00000129226	74	3456	20063	0.235349	1	1	100
