# Supplementary material for: Analysis of Dual Class I Histone Deacetylase and Lysine Demethylase Inhibitor Domatinostat (4SC-202) on Growth and Cellular and Genomic Landscape of Atypical Teratoid/Rhabdoid
Source: MDPI journal article supplement (doi:10.3390/cancers12030756), 2020-03-23
Supplement: s1 [file s1 › File S3_SingleCell_DAVID.xlsx]

## Sheet: File S3_SingleCell_DAVID
Annotation Cluster 1	Enrichment Score: 55.798941455977996
Category	Term	Count	%	PValue	Genes	List Total	Pop Hits	Pop Total	Fold Enrichment	Bonferroni	Benjamini	FDR
GOTERM_BP_DIRECT	GO:0006614~SRP-dependent cotranslational protein targeting to membrane	81	7.57009	1.36208e-85	RPL18, RPL17, RPL36A, RPL19, RPL14, RPL13, RPL15, RPLP2, RPS2, RPS3, RPS3A, RPLP0, RPLP1, FAU, RPL10, RPL11, RPL12, RPS27A, RPL35A, RPS4X, RPS18, RPS19, RPS16, RPL41, RPS17, RPS14, RPS15, RPS12, RPS13, RPS10, RPS11, UBA52, RPL27A, RPL35, RPS15A, RPL36, RPL37, RPL38, RPL39, SEC63, RPS25, RPS26, RPS27, RPL30, RPS28, RPS29, RPL32, RPL7, RPL6, RPL31, RPL9, RPL34, RPL8, RPL3, RPL5, RPS20, RPL4, RPL7A,…	962	94	16792	15.0413	4.43492e-82	4.43492e-82	2.47502e-82
GOTERM_BP_DIRECT	GO:0019083~viral transcription	82	7.66355	6.80075e-76	RPL18, RPL17, RPL36A, RPL19, RPL14, RPL13, RPL15, RPLP2, RPS2, RPS3, RPS3A, RPLP0, RPLP1, FAU, RPL10, RPL11, RPL12, TPR, RPS27A, RPL35A, RPS4X, RPS18, RPS19, RPS16, RPL41, RPS17, RPS14, RPS15, RPS12, RPS13, RPS10, NUP107, RPS11, UBA52, NUP160, RPL27A, RPL35, RPS15A, RPL36, RPL37, RPL38, RPL39, RPS25, RPS26, RPS27, RPL30, RPS28, RPS29, RPL32, RPL7, RPL6, RPL31, RPL9, RPL34, RPL8, RPL3, RPL5, RPS20…	962	112	16792	12.7798	2.21433e-72	1.10716e-72	1.23576e-72
GOTERM_BP_DIRECT	GO:0000184~nuclear-transcribed mRNA catabolic process, nonsense-mediated decay	81	7.57009	7.68986e-71	RPL18, RPL17, RPL36A, RPL19, RPL14, RPL13, RPL15, RPLP2, RPS2, RPS3, RPS3A, RPLP0, RPLP1, FAU, RPL10, RPL11, RPL12, RPS27A, RPL35A, RPS4X, RPS18, RPS19, RPS16, RPL41, RPS17, RPS14, RPS15, RPS12, RPS13, RPS10, RPS11, UBA52, RPL27A, RPL35, RPS15A, RPL36, RPL37, RPL38, RPL39, RPS25, RPS26, RPS27, RPL30, RPS28, RPS29, RPL32, RPL7, RPL6, RPL31, EIF3E, RPL9, RPL34, RPL8, RPL3, RPL5, RPS20, RPL4, RPL10A…	962	119	16792	11.8813	2.50382e-67	8.34606e-68	1.39732e-67
GOTERM_BP_DIRECT	GO:0006413~translational initiation	85	7.94393	2.58879e-69	RPL18, RPL17, RPL36A, RPL19, RPL14, RPL13, RPL15, EIF5B, RPLP2, RPS2, LARP1, RPS3, RPS3A, RPLP0, RPLP1, FAU, RPL10, EIF1, RPL11, RPL12, RPS27A, RPL35A, RPS4X, RPS18, EIF4G3, RPS19, RPS16, RPL41, RPS17, RPS14, RPS15, RPS12, RPS13, RPS10, RPS11, UBA52, RPL27A, RPL35, RPS15A, RPL36, RPL37, RPL38, RPL39, RPS25, RPS26, RPS27, RPL30, RPS28, RPS29, RPL32, RPL7, RPL6, RPL31, EIF3E, RPL9, RPL34, RPL8, RPL…	962	137	16792	10.8299	8.42909e-66	2.10727e-66	4.70406e-66
KEGG_PATHWAY	hsa03010:Ribosome	81	7.57009	4.53844e-60	RPL18, RPL17, RPL36A, RPL19, RPL14, RPL13, RPL15, RPLP2, RPS2, RPS3, RPS3A, RPLP0, RPLP1, FAU, RPL10, RPL11, RPL12, RPS27A, RPL36AL, RPL35A, MRPS6, RPS4X, RPS18, RPS19, RPS16, RPL41, RPS17, RPS14, RPS15, RPS12, RPS13, RPS10, RPS11, UBA52, RPL27A, RPL35, RPS15A, RPL36, RPL37, RPL38, RPL39, RPS25, RPS26, RPS27, RPL30, RPS28, RPS29, RPL32, RPL7, RPL6, RPL31, RPL9, RPL34, RPL8, RPL3, RPL5, RPS20, RPL…	463	136	6879	8.84892	1.13461e-57	1.13461e-57	5.89586e-57
UP_KEYWORDS	Ribosomal protein	82	7.66355	3.42238e-55	RPL18, RPL17, RPL36A, RPL19, RPL14, RPL13, RPL15, RPLP2, RPS2, RPS3, RPS3A, RPLP0, RPLP1, FAU, RPL10, RPL11, RPL12, RPS27A, RPL36AL, RPL35A, MRPS6, RPS4X, RPS18, RPS19, RPS16, RPL41, RPS17, RPS14, RPS15, RPS12, RPS13, RPS10, RPS11, UBA52, RPL27A, RPL35, RPS15A, RPL36, RPL37, RPL38, RPL39, RPS25, RPS26, RPS27, RPL30, RPS28, RPS29, RPL32, RPL7, RPL6, RPL31, RPL9, RPL34, RPL8, RPL3, RPL5, RPS20, RPL…	1047	185	20581	8.71288	1.48531e-52	4.95104e-53	4.8302e-52
UP_KEYWORDS	Ribonucleoprotein	99	9.25234	2.9969e-53	RPL18, RPL17, RPL36A, RPL19, RPL14, LSM8, RPL13, RPL15, RPLP2, SNRPD2, RPLP0, RPLP1, RPL10, FAU, RPL11, RPL12, RPS27A, RPL36AL, RPL35A, HNRNPA2B1, HNRNPR, RPS18, RPS19, RPS16, RPS17, RPS14, RPS15, RPS12, RPS13, RPS10, RPS11, UBA52, HNRNPA3, RPS25, RPS26, RPS27, RPS28, RPL7, RPS29, RPL6, RPL9, RPL8, RPL3, RPL5, RPL7A, RPL10A, RPL4, RPS20, RPS21, RPS23, RPS24, RPSA, RPS9, HEATR1, RPL23A, RPS6, RPS5…	1047	296	20581	6.57451	1.30065e-50	2.60131e-51	4.22969e-50
GOTERM_CC_DIRECT	GO:0005840~ribosome	76	7.1028	4.039e-50	RPL18, RPL36A, RPL19, RPL14, RPL13, RPL15, RPLP2, RPS2, CANX, RPS3, RPS3A, RPLP0, RPLP1, FAU, RPL10, RPL11, RPS27A, RPL35A, SF1, RPS4X, RPS18, RPS19, RPS16, RPL41, RPS17, RPS14, RPS15, RPS13, RPS10, RPS11, UBA52, RPL27A, RPL35, RPS15A, RPL36, RPL37, RPL38, RPS25, RPS26, RPS27, RPL30, RPS28, RPS29, RPL32, RPL7, RPL6, RPL31, RPL9, RPL34, RPL8, RPL3, RPL5, RPS20, RPL4, RPL7A, RPL10A, RPS21, RPS23, R…	1000	166	18224	8.34352	2.71421e-47	2.71421e-47	6.05777e-47
GOTERM_BP_DIRECT	GO:0006412~translation	91	8.50467	7.08272e-48	RPL18, RPL17, RPL36A, RPL19, RPL14, RPL13, COA1, RPL15, RPLP2, RPS2, RPS3, RPS3A, RPLP0, RPLP1, FAU, RPL10, RPL11, RPL12, RPS27A, RPL36AL, EGFR, RPL35A, SLC25A6, MRPS6, RPS4X, GTF2H2, RPS18, RPS19, RPS16, RPL41, RPS17, RPS14, SLC25A36, RPS15, RPS12, SLC25A37, RPS13, RPS10, RPS11, UBA52, NACA, RPL27A, RPL35, RPS15A, RPL36, RPL37, IGF2BP3, RPL38, RPL39, RPS25, RPS26, RPS27, RPL30, RPS28, RPS29, RPL…	962	253	16792	6.27839	2.30613e-44	4.61227e-45	1.287e-44
GOTERM_BP_DIRECT	GO:0006364~rRNA processing	84	7.85047	1.29862e-47	RPL18, RPL17, RPL36A, RPL19, RPL14, RPL13, RPL15, RPLP2, RPS2, RPS3, RPS3A, RPLP0, RPLP1, FAU, RPL10, RPL11, RPL12, RPS27A, RPL35A, NOL8, RPS4X, RPS18, RPS19, RPS16, RPL41, RPS17, RPS14, RPS15, RPS12, RPS13, RPS10, RPS11, UBA52, RPL27A, RPL35, RPS15A, RPL36, RPL37, RPL38, RPL39, RPS25, RPS26, RPS27, RPL30, CHD7, RPS28, RPS29, RPL32, RPL7, RPL6, RPL31, RPL9, RPL34, RPL8, RPL3, RPL5, MTERF4, RPS20,…	962	214	16792	6.85161	4.22832e-44	7.0472e-45	2.35972e-44
GOTERM_MF_DIRECT	GO:0003735~structural constituent of ribosome	84	7.85047	5.35211e-46	RPL18, RPL17, RPL36A, RPL19, RPL14, RPL13, COA1, RPL15, RPLP2, RPS2, RPS3, RPS3A, RPLP0, RPLP1, FAU, RPL10, RPL11, RPL12, RPS27A, RPL36AL, RPL35A, SLC25A6, MRPS6, RPS4X, RPS18, RPS19, RPS16, RPL41, RPS17, RPS14, SLC25A36, RPS15, RPS12, SLC25A37, RPS13, RPS10, RPS11, UBA52, RPL27A, RPL35, RPS15A, RPL36, RPL37, RPL38, RPL39, RPS26, RPS27, RPL30, RPS28, RPS29, RPL32, RPL7, RPL6, RPL31, RPL9, RPL34, …	971	222	16881	6.57817	4.86507e-43	2.43254e-43	8.35332e-43
GOTERM_CC_DIRECT	GO:0022625~cytosolic large ribosomal subunit	49	4.57944	2.78103e-45	RPL18, RPL17, RPL36A, RPL19, RPL14, RPL13, COA1, RPL15, RPL27A, RPL35, RPLP2, RPL36, RPL37, RPL38, RPL39, RPL30, RPL32, RPL7, RPL6, RPL31, RPLP0, RPL34, RPL9, RPLP1, RPL8, RPL3, RPL10, RPL5, RPL11, RPL4, RPL7A, RPL10A, RPL12, RPL36AL, RPL35A, RPL26, RPL27, RPL24, RPL23A, RPL28, RPL29, RPL18A, RPL41, RPL23, RPL13A, RPL22, RPL21, RPL37A, UBA52	1000	68	18224	13.132	1.86885e-42	9.34425e-43	4.17104e-42
GOTERM_CC_DIRECT	GO:0022627~cytosolic small ribosomal subunit	32	2.99065	8.65753e-28	RPS15A, RPS2, RPS3, RPS25, RPS26, RPS27, RPS28, RPS29, RPS3A, FAU, RPS20, RPS21, RPS23, RPS27A, RPS24, RPSA, RPS9, RPS4X, RPS6, RPS5, RPS8, RPS7, RPS18, RPS19, RPS16, RPS17, RPS14, RPS15, RPS12, RPS13, RPS10, RPS11	1000	48	18224	12.1493	5.81786e-25	9.69643e-26	1.29847e-24
Annotation Cluster 2	Enrichment Score: 11.846384720431768
Category	Term	Count	%	PValue	Genes	List Total	Pop Hits	Pop Total	Fold Enrichment	Bonferroni	Benjamini	FDR
UP_KEYWORDS	RNA-binding	114	10.6542	1.23934e-30	XPO1, RNMT, LSM8, RBM4, RBM5, RBM6, EIF5A, ZNF638, DDX17, SRRM2, TIA1, TARDBP, PUM1, SRRM1, RBMS3, RPL11, DHX36, ACIN1, RPL12, PTBP2, NCBP3, RBMS1, PABPN1, RBFOX2, RPL35A, CHTOP, DDX39B, HNRNPA2B1, SECISBP2, HNRNPR, RPS18, AQR, TIAL1, CELF1, RPS11, LRPPRC, FUS, SRSF10, SRSF11, MYEF2, IGF2BP2, IGF2BP3, HNRNPA3, DDX46, RPL7, NPM1, RPL8, RPL5, MTERF4, NOVA1, EWSR1, ZC3H14, RBM12B, RPS9, YTHDC2, RPL2…	1047	665	20581	3.36979	5.37873e-28	7.6839e-29	1.74915e-27
INTERPRO	IPR012677:Nucleotide-binding, alpha-beta plait	53	4.95327	4.03488e-16	U2SURP, RBM4, RBM5, RBM6, ZNF638, SLIRP, TARDBP, TIA1, RBMS3, PTBP2, ACIN1, NCBP3, RBMS1, PABPN1, RBFOX2, NOL8, HNRNPA2B1, SPEN, HNRNPR, TIAL1, CELF1, RBM39, FUS, RBM33, SRSF10, TRA2B, SRSF11, TRA2A, MYEF2, IGF2BP2, IGF2BP3, HNRNPA3, TNRC6C, MSI2, SNRNP70, TNRC6B, RBM28, TNRC6A, EWSR1, RBM25, RPS24, RBM26, RBM23, RBM12B, SREK1, RPL23A, RBMX, SRSF2, SRSF5, SRSF7, SFPQ, RNPC3, HNRNPH1	1011	264	18559	3.68532	7.71827e-13	7.71827e-13	7.54952e-13
INTERPRO	IPR000504:RNA recognition motif domain	47	4.39252	5.34716e-15	FUS, RBM33, SRSF10, TRA2B, U2SURP, RBM4, TRA2A, SRSF11, RBM5, RBM6, MYEF2, IGF2BP2, ZNF638, IGF2BP3, SLIRP, HNRNPA3, TNRC6C, TIA1, TARDBP, MSI2, RBMS3, SNRNP70, PTBP2, RBM28, EWSR1, RBM25, RBMS1, RBM26, PABPN1, RBFOX2, RBM23, RBM12B, NOL8, SREK1, HNRNPA2B1, SPEN, RBMX, HNRNPR, SRSF2, SRSF5, SRSF7, SFPQ, TIAL1, CELF1, RBM39, RNPC3, HNRNPH1	1011	226	18559	3.81762	9.26192e-12	4.63096e-12	9.01501e-12
GOTERM_MF_DIRECT	GO:0000166~nucleotide binding	61	5.70093	1.40805e-14	HINT1, RBM4, U2SURP, RBM5, RBM6, ZNF638, SLIRP, ATP2B1, LTB4R, TARDBP, TIA1, RBMS3, ACIN1, PTBP2, NCBP3, RBMS1, CYR61, PABPN1, RBFOX2, HSP90AA1, NOL8, HNRNPA2B1, SPEN, HNRNPR, TIAL1, CELF1, RBM39, REV3L, FUS, RBM33, SRSF10, TRA2B, TRA2A, SRSF11, MYEF2, IGF2BP2, IGF2BP3, TRIB2, HNRNPA3, TNRC6C, MSI2, SNRNP70, TNRC6B, RBM28, TNRC6A, RBM25, EWSR1, RBM26, RPS24, RBM23, RBM12B, SREK1, RPL23A, ATP1A1, …	971	348	16881	3.0474	1.28167e-11	2.56339e-12	2.20046e-11
SMART	SM00360:RRM	46	4.29907	4.42179e-14	FUS, RBM33, SRSF10, TRA2B, U2SURP, RBM4, TRA2A, SRSF11, RBM5, RBM6, MYEF2, IGF2BP2, ZNF638, IGF2BP3, SLIRP, HNRNPA3, TIA1, TARDBP, MSI2, RBMS3, SNRNP70, PTBP2, RBM28, EWSR1, RBM25, RBMS1, RBM26, PABPN1, RBFOX2, RBM23, RBM12B, NOL8, SREK1, HNRNPA2B1, SPEN, RBMX, HNRNPR, SRSF2, SRSF5, SRSF7, SFPQ, TIAL1, CELF1, RBM39, RNPC3, HNRNPH1	604	212	10057	3.61288	1.73654e-11	1.73654e-11	6.1473e-11
UP_SEQ_FEATURE	domain:RRM 2	28	2.61682	1.8057e-10	RPL36A, RBM4, RBM5, MYEF2, IGF2BP2, ZNF638, IGF2BP3, HNRNPA3, TARDBP, TIA1, RBMS3, MSI2, PTBP2, RBM28, RBM26, RBMS1, RBM23, RBM12B, HNRNPA2B1, SPEN, HNRNPR, SRSF5, SFPQ, TIAL1, CELF1, RNPC3, RBM39, HNRNPH1	1037	125	20063	4.33376	5.94617e-07	1.48654e-07	3.28522e-07
UP_SEQ_FEATURE	domain:RRM 1	28	2.61682	1.8057e-10	RPL36A, RBM4, RBM5, MYEF2, IGF2BP2, ZNF638, IGF2BP3, HNRNPA3, TARDBP, TIA1, RBMS3, MSI2, PTBP2, RBM28, RBM26, RBMS1, RBM23, RBM12B, HNRNPA2B1, SPEN, HNRNPR, SRSF5, SFPQ, TIAL1, CELF1, RNPC3, RBM39, HNRNPH1	1037	125	20063	4.33376	5.94617e-07	1.48654e-07	3.28522e-07
UP_SEQ_FEATURE	domain:RRM	22	2.05607	5.78156e-06	FUS, PABPN1, RBFOX2, RBM33, SRSF10, NOL8, SREK1, TRA2B, U2SURP, SRSF11, TRA2A, RBM6, SLIRP, RBMX, SRSF2, TNRC6C, SRSF7, SNRNP70, TNRC6B, TNRC6A, RBM25, EWSR1	1037	135	20063	3.15287	0.0188586	0.0015853	0.0105182
UP_SEQ_FEATURE	domain:RRM 3	12	1.1215	0.00025625	RPL36A, RBM12B, TIAL1, TIA1, MYEF2, CELF1, RBM39, SPEN, PTBP2, HNRNPH1, HNRNPR, RBM28	1037	61	20063	3.806	0.569987	0.0345531	0.465185
GOTERM_MF_DIRECT	GO:0003676~nucleic acid binding	83	7.75701	0.000427358	ZNF83, ZNF292, ZFP14, RBM4, U2SURP, RBM5, TMEM161B, ZKSCAN1, ZNF638, SLIRP, ZNF518A, GLI3, ZBTB37, DDX17, TIA1, TARDBP, ZNF302, EXOG, DHX36, ACIN1, PTBP2, ZNF493, RBMS1, PABPN1, RBFOX2, ZCCHC11, ZNF644, NOL8, HNRNPA2B1, DDX39B, ZNF791, SPEN, MECOM, RBBP6, HNRNPR, ZNF3, GTF2H2, TIAL1, SNRNP200, ZNF431, CELF1, RBM39, FUS, RBM33, SRSF10, TRA2B, TRA2A, SRSF11, MYEF2, ZNF75A, IGF2BP3, ZNF655, HNRNPA3,…	971	985	16881	1.46494	0.321961	0.0225967	0.664921
Annotation Cluster 3	Enrichment Score: 11.462322809876946
Category	Term	Count	%	PValue	Genes	List Total	Pop Hits	Pop Total	Fold Enrichment	Bonferroni	Benjamini	FDR
UP_KEYWORDS	mRNA processing	66	6.16822	2.38643e-21	RNMT, PRPF4B, LSM8, RBM4, RBM5, SNRPD2, YBX1, PNN, SRRM2, TARDBP, SRRM1, QKI, ACIN1, PTBP2, LUC7L3, NCBP3, CDK13, PABPN1, KHDRBS1, RBFOX2, SYMPK, HNRNPA2B1, DDX39B, SF1, PRPF3, MBNL1, HNRNPR, AQR, PAPD4, SNRNP200, CELF1, RBM39, THOC2, PRPF38B, SRSF10, TRA2B, TRA2A, SRSF11, ZFP36L1, HNRNPA3, SF3B1, DDX46, SCAF11, ZNF326, PRPF8, DHX15, SNRNP70, RBM28, RBM25, CSTF3, LGALS3, SREK1, DDX5, RBMX, SRSF2,…	1047	332	20581	3.90774	1.03571e-18	1.03571e-19	3.3681e-18
UP_KEYWORDS	mRNA splicing	55	5.14019	3.72044e-19	PRPF4B, LSM8, RBM4, RBM5, SNRPD2, YBX1, PNN, TARDBP, SRRM2, SRRM1, QKI, PTBP2, ACIN1, LUC7L3, CDK13, RBFOX2, HNRNPA2B1, DDX39B, SF1, PRPF3, MBNL1, HNRNPR, AQR, SNRNP200, CELF1, RBM39, THOC2, PRPF38B, SRSF10, TRA2B, TRA2A, SRSF11, HNRNPA3, SF3B1, DDX46, SCAF11, ZNF326, PRPF8, DHX15, RBM28, RBM25, LGALS3, SREK1, DDX5, RBMX, SRSF2, SUGP2, SRSF5, SON, SRSF7, CLASRP, SFPQ, ZRANB2, RNPC3, HNRNPH1	1047	260	20581	4.15824	1.61467e-16	1.24206e-17	5.25087e-16
GOTERM_BP_DIRECT	GO:0006397~mRNA processing	40	3.73832	3.00946e-13	RBM4, SRSF11, ZFP36L1, SCAF11, ZNF326, TARDBP, PRPF8, DHX15, SRRM1, QKI, PTBP2, SNRNP70, ACIN1, RBM28, RBM25, RBM26, KHDRBS1, ZC3H14, RBFOX2, RBM23, LGALS3, SREK1, HNRNPA2B1, PRPF3, MBNL1, RBBP6, HNRNPR, SRSF2, SRSF5, SON, SUGP2, PAPD4, SRSF7, CLASRP, SFPQ, ZRANB2, CELF1, RBM39, PRPF38B, ADAR	962	179	16792	3.90063	9.79996e-10	1.39999e-10	5.46907e-10
GOTERM_BP_DIRECT	GO:0008380~RNA splicing	38	3.5514	5.86863e-13	PRPF4B, RBM4, SRSF11, RBM5, SNRPD2, ZNF638, SCAF11, ZNF326, TARDBP, PRPF8, DHX15, SRRM1, QKI, MTERF4, SNRNP70, ACIN1, RBM28, NOVA1, LUC7L3, RBM25, RBFOX2, LGALS3, SREK1, DDX39B, PRPF3, MBNL1, SRSF2, SON, SUGP2, SRSF7, CLASRP, SFPQ, ZRANB2, RBM39, RNPC3, THOC2, PRPF38B, PDCD7	962	166	16792	3.99579	1.91083e-09	2.38854e-10	1.06639e-09
GOTERM_BP_DIRECT	GO:0000398~mRNA splicing, via spliceosome	42	3.92523	2.1502e-11	FUS, PRPF4B, LSM8, SRSF10, TRA2B, TRA2A, SRSF11, RBM5, SNRPD2, YBX1, PNN, HNRNPA3, SF3B1, DDX46, SRRM2, PRPF8, PCBP2, DHX15, SRRM1, SNRNP70, NOVA1, CCAR1, PABPN1, CSTF3, DDX39B, HNRNPA2B1, SF1, PRPF3, SPEN, DDX5, HNRNPR, RBMX, UBL5, SRSF2, SRSF5, PAPOLA, AQR, SRSF7, SNRNP200, RNPC3, HNRNPH1, PDCD7	962	222	16792	3.30235	7.00106e-08	7.00106e-09	3.90712e-08
UP_KEYWORDS	Spliceosome	25	2.33645	2.20818e-08	PRPF4B, LSM8, RBM5, SNRPD2, PNN, HNRNPA3, SF3B1, PRPF8, SRRM2, SRRM1, RBM28, LGALS3, SREK1, DDX39B, HNRNPA2B1, SF1, PRPF3, DDX5, HNRNPR, RBMX, AQR, SNRNP200, RNPC3, HNRNPH1, PRPF38B	1047	127	20581	3.86951	9.58345e-06	4.79175e-07	3.11653e-05
KEGG_PATHWAY	hsa03040:Spliceosome	26	2.42991	1.98722e-06	LSM8, SRSF10, TRA2B, TRA2A, U2SURP, SNRPD2, HNRNPA3, SF3B1, TCERG1, DDX46, PRPF8, DHX15, ACIN1, SNRNP70, RBM25, DDX39B, PRPF3, DDX5, RBMX, SRSF2, SRSF5, AQR, SRSF7, SNRNP200, THOC2, PRPF38B	463	133	6879	2.90446	0.000496681	0.000248372	0.00258155
GOTERM_CC_DIRECT	GO:0071013~catalytic step 2 spliceosome	16	1.49533	0.000135298	PRPF4B, HNRNPA2B1, SNRPD2, DDX5, RBMX, HNRNPR, PNN, HNRNPA3, NRDE2, SF3B1, AQR, PRPF8, SRRM2, SNRNP200, SRRM1, HNRNPH1	1000	92	18224	3.16939	0.0869151	0.00432047	0.20273
Annotation Cluster 4	Enrichment Score: 8.026326362362445
Category	Term	Count	%	PValue	Genes	List Total	Pop Hits	Pop Total	Fold Enrichment	Bonferroni	Benjamini	FDR
GOTERM_CC_DIRECT	GO:0005913~cell-cell adherens junction	47	4.39252	2.64222e-09	RTN4, ALDOA, LDHA, USP8, CADM1, RPL14, CALD1, RPL15, RPS2, TAGLN2, PRDX1, ITGB1, LARP1, PKM, RPS26, PFN1, MACF1, RPL6, RPL34, EIF3E, NDRG1, HSPA5, RPL7A, CC2D1A, GOLGA3, AHNAK, DLG1, GOLGA2, ENO1, ARGLU1, EGFR, DBNL, BSG, RAN, FLOT1, S100A11, PKN2, KTN1, RPL24, RPL23A, CLIC1, YWHAE, FLNA, RPL29, KRT18, NOP56, SPTAN1	1000	323	18224	2.65179	1.77557e-06	1.04445e-07	3.96285e-06
GOTERM_MF_DIRECT	GO:0098641~cadherin binding involved in cell-cell adhesion	45	4.20561	3.23091e-09	RTN4, ALDOA, LDHA, USP8, RPL14, CALD1, RPL15, RPS2, TAGLN2, PRDX1, ITGB1, LARP1, PKM, RPS26, PFN1, MACF1, RPL6, RPL34, EIF3E, NDRG1, HSPA5, RPL7A, CC2D1A, GOLGA3, AHNAK, DLG1, GOLGA2, ENO1, ARGLU1, EGFR, DBNL, BSG, RAN, S100A11, PKN2, KTN1, RPL24, RPL23A, CLIC1, YWHAE, FLNA, RPL29, KRT18, NOP56, SPTAN1	971	290	16881	2.6977	2.93689e-06	4.19557e-07	5.04265e-06
GOTERM_BP_DIRECT	GO:0098609~cell-cell adhesion	40	3.73832	9.76624e-08	RTN4, ALDOA, LDHA, USP8, RPL14, CALD1, RPL15, RPS2, TAGLN2, PRDX1, LARP1, PKM, RPS26, PFN1, MACF1, RPL6, RPL34, EIF3E, NDRG1, HSPA5, CC2D1A, RPL7A, GOLGA3, AHNAK, GOLGA2, ENO1, ARGLU1, DBNL, BSG, RAN, S100A11, PKN2, KTN1, RPL24, RPL23A, YWHAE, RPL29, KRT18, NOP56, SPTAN1	962	271	16792	2.57643	0.000317938	2.89077e-05	0.000177462
Annotation Cluster 5	Enrichment Score: 7.104146346990192
Category	Term	Count	%	PValue	Genes	List Total	Pop Hits	Pop Total	Fold Enrichment	Bonferroni	Benjamini	FDR
UP_KEYWORDS	Transcription regulation	195	18.2243	1.27509e-12	BBX, ZNF638, EPC1, DDX17, ZNF397, DHX36, CCAR1, CHTOP, ZNF644, ZNF791, MED13, MECOM, BAZ1B, PIAS2, PIAS1, ZNF618, ZNF224, TCF4, TCF25, PLAG1, TP53BP1, SMAD5, MAML2, DDX5, NOTCH2, ZFHX4, ICE2, DMTF1, TRPS1, RBPJ, ZNF117, NCOR1, RERE, CREBRF, CCNT2, ZNF292, TAF1D, ZNF518A, SLIRP, GLI3, ZBTB37, YBX1, DYNLL1, ZNF680, BRD4, NR2F2, ZNF493, RBBP4, CTBP2, SF1, TLE4, TTF1, SPEN, RBBP7, GTF2H2, NOC2L, ZNF8…	1047	2332	20581	1.64371	5.5339e-10	3.45869e-11	1.7996e-09
UP_KEYWORDS	Transcription	199	18.5981	1.37728e-12	BBX, ZNF638, EPC1, DDX17, ZNF397, DHX36, CCAR1, CHTOP, ZNF644, ZNF791, MED13, MECOM, BAZ1B, PIAS2, PIAS1, CHCHD2, MYEF2, ZNF618, ZNF224, TCF4, TCF25, PLAG1, TP53BP1, SMAD5, MAML2, DDX5, NOTCH2, ZFHX4, ICE2, DMTF1, TRPS1, RBPJ, ZNF117, NCOR1, RERE, CREBRF, CCNT2, ZNF292, TAF1D, ZNF518A, SLIRP, GLI3, ZBTB37, YBX1, DYNLL1, ZNF680, BRD4, NR2F2, ZNF493, RBBP4, CTBP2, SF1, TLE4, TTF1, SPEN, RBBP7, GTF2…	1047	2398	20581	1.63126	5.97719e-10	3.51599e-11	1.94377e-09
GOTERM_BP_DIRECT	GO:0006351~transcription, DNA-templated	161	15.0467	1.2896e-06	ZNF451, BBX, CNOT2, ZNF638, CBX6, PNN, HOXC6, ESF1, EPC1, GABPB1, DDX17, CGGBP1, ZNF302, ATF6B, ZNF397, DHX36, DNAJC2, CCAR1, ARGLU1, ZNF644, ZNF791, MTA1, ARID1A, ARID1B, MECOM, POLR2J3, ZNF3, BAZ1B, TRIM33, MGA, EDF1, PIAS2, ZNF431, PIAS1, LRPPRC, SMARCA4, FGFR1, TSHZ2, HMGB3, CHCHD2, MYEF2, ZNF618, ZNF326, ZNF224, TFDP2, TCF25, EWSR1, HELLS, PLAG1, EEF1A1, ZMYM2, CREBZF, TP53BP1, SMAD5, WHSC1,…	962	1955	16792	1.4375	0.00419015	0.000322944	0.0023433
UP_KEYWORDS	DNA-binding	138	12.8972	0.000459468	RAD51B, HMGN3, HMGN2, BBX, ZNF638, PNN, HOXC6, CGGBP1, TARDBP, ZNF302, ATF6B, ZNF397, SRRM1, H2AFY, DHX36, LUC7L3, RBMS1, POLK, ZNF644, ZNF791, MTA1, ARID1A, ARID1B, MECOM, ZNF3, TRIM33, MTF2, MGA, EDF1, PIAS2, ZNF431, PIAS1, LRPPRC, FUS, TSHZ2, HMGB3, MYEF2, SOX4, ZNF618, MEIS2, ZNF326, ZNF224, TFDP2, TCF4, TCF25, PLAG1, TAF1, DNMT3A, TP53BP1, SMAD5, TEAD1, WHSC1, ATM, ZFHX4, DMTF1, TRPS1, EBF2,…	1047	2050	20581	1.32326	0.180823	0.0055251	0.646524
GOTERM_BP_DIRECT	GO:0006355~regulation of transcription, DNA-templated	112	10.4673	0.00289731	BBX, CNOT2, PTTG1, ZNF638, PNN, ESF1, TARDBP, ZNF302, ZNF397, SAMD4A, CCAR1, ARGLU1, CHTOP, ZNF644, ZNF791, MTA1, MECOM, ZNF3, RALGAPA1, BAZ1B, MGA, EDF1, ZNF431, LRPPRC, SMARCA4, HMGB3, SRSF10, SOX4, CALR, ZMYND8, ZNF618, MEIS2, ZNF224, RPL6, DMD, BTF3, MTERF4, EWSR1, EEF1A1, SMAD5, NOTCH2, ZFHX4, DMTF1, EBF2, EBF1, ZNF117, HDAC7, CREBRF, ZNF83, RSF1, ZFP14, GPBP1, HP1BP3, HINT1, TAF1D, ARID4B, …	962	1504	16792	1.29986	0.999921	0.147962	5.13575
Annotation Cluster 6	Enrichment Score: 6.104529197868542
Category	Term	Count	%	PValue	Genes	List Total	Pop Hits	Pop Total	Fold Enrichment	Bonferroni	Benjamini	FDR
INTERPRO	IPR019787:Zinc finger, PHD-finger	21	1.96262	5.3316e-09	KMT2E, RSF1, SHPRH, KMT2A, KMT2C, WHSC1, ZMYND8, PHF3, PHF14, BAZ1B, BPTF, TRIM33, MTF2, WHSC1L1, ASH1L, KDM5A, BAZ2B, KDM5B, BAZ2A, NSD1, CHD4	1011	79	18559	4.87973	9.26628e-06	3.08877e-06	9.01641e-06
INTERPRO	IPR011011:Zinc finger, FYVE/PHD-type	27	2.52336	3.86672e-08	KMT2E, RSF1, KMT2A, KMT2C, ZMYND8, ZFYVE16, BAZ2B, PHF20L1, KDM5A, KDM5B, BAZ2A, CHD4, SHPRH, WHSC1, PCLO, ATRX, PHF3, BPTF, TRIM33, PHF14, BAZ1B, MTF2, WHSC1L1, ASH1L, HGS, NSD1, ANKFY1	1011	141	18559	3.51518	6.72014e-05	1.68008e-05	6.53911e-05
INTERPRO	IPR001965:Zinc finger, PHD-type	21	1.96262	4.74552e-08	KMT2E, RSF1, SHPRH, KMT2A, KMT2C, WHSC1, ZMYND8, PHF3, PHF14, BAZ1B, BPTF, TRIM33, MTF2, WHSC1L1, ASH1L, KDM5A, BAZ2B, KDM5B, BAZ2A, NSD1, CHD4	1011	89	18559	4.33144	8.24737e-05	1.64953e-05	8.02526e-05
INTERPRO	IPR019786:Zinc finger, PHD-type, conserved site	18	1.68224	7.19163e-08	KMT2E, RSF1, SHPRH, WHSC1, ZMYND8, PHF3, PHF14, TRIM33, BPTF, BAZ1B, MTF2, WHSC1L1, ASH1L, KDM5A, PHF20L1, KDM5B, NSD1, CHD4	1011	67	18559	4.93175	0.000124983	2.08315e-05	0.000121619
SMART	SM00249:PHD	21	1.96262	2.10433e-07	KMT2E, RSF1, SHPRH, KMT2A, KMT2C, WHSC1, ZMYND8, PHF3, PHF14, BAZ1B, BPTF, TRIM33, MTF2, WHSC1L1, ASH1L, KDM5A, BAZ2B, KDM5B, BAZ2A, NSD1, CHD4	604	89	10057	3.92881	8.26969e-05	4.13493e-05	0.000292759
UP_SEQ_FEATURE	zinc finger region:PHD-type 2	11	1.02804	1.50412e-06	PHF14, KMT2A, BPTF, MTF2, KMT2C, WHSC1L1, WHSC1, KDM5A, KDM5B, NSD1, CHD4	1037	30	20063	7.09396	0.00494082	0.00070733	0.00273649
UP_SEQ_FEATURE	zinc finger region:PHD-type 3	7	0.654206	3.28049e-06	KMT2A, KMT2C, WHSC1L1, WHSC1, KDM5A, KDM5B, NSD1	1037	10	20063	13.543	0.0107445	0.00107968	0.00596822
UP_SEQ_FEATURE	zinc finger region:PHD-type 1	11	1.02804	4.02164e-06	PHF14, KMT2A, BPTF, MTF2, KMT2C, WHSC1L1, WHSC1, KDM5A, KDM5B, NSD1, CHD4	1037	33	20063	6.44905	0.013156	0.00120321	0.00731656
UP_SEQ_FEATURE	zinc finger region:PHD-type	12	1.1215	5.662e-05	KMT2E, ATRX, PHF3, SHPRH, RSF1, TRIM33, BAZ1B, ASH1L, PHF20L1, BAZ2B, BAZ2A, ZMYND8	1037	52	20063	4.46473	0.170104	0.010908	0.102962
INTERPRO	IPR013083:Zinc finger, RING/FYVE/PHD-type	43	4.01869	0.000541611	KMT2E, LTN1, RSF1, KMT2A, KMT2C, PPIL2, ZMYND8, RNF213, TTC3, MYCBP2, TRIM73, SCAF11, ZFYVE16, KDM5A, BAZ2B, PHF20L1, KDM5B, BAZ2A, USP33, CHD4, SHPRH, MEX3A, WHSC1, RBBP6, PCLO, ATRX, TRIM38, TRIM56, PHF3, RNF115, BAZ1B, TRIM33, BPTF, PHF14, MTF2, WHSC1L1, ASH1L, HGS, PIAS2, USP22, MDM4, NSD1, ANKFY1	1011	453	18559	1.7425	0.609987	0.0438466	0.911996
Annotation Cluster 7	Enrichment Score: 4.22858528767533
Category	Term	Count	%	PValue	Genes	List Total	Pop Hits	Pop Total	Fold Enrichment	Bonferroni	Benjamini	FDR
INTERPRO	IPR001487:Bromodomain	14	1.30841	2.7008e-07	TAF1, KMT2A, ZMYND8, KIAA2026, PHIP, BRWD1, TRIM33, BPTF, BAZ1B, ASH1L, BRD4, BAZ2B, BAZ2A, SMARCA4	1011	43	18559	5.97672	0.000469289	6.70547e-05	0.000456738
UP_KEYWORDS	Bromodomain	13	1.21495	3.04593e-07	TAF1, KMT2A, ZMYND8, PHIP, BRWD1, TRIM33, BPTF, BAZ1B, ASH1L, BRD4, BAZ2B, BAZ2A, SMARCA4	1047	39	20581	6.55237	0.000132185	6.29491e-06	0.000429889
SMART	SM00297:BROMO	13	1.21495	4.05822e-06	TAF1, KMT2A, ZMYND8, PHIP, BRWD1, TRIM33, BPTF, BAZ1B, ASH1L, BRD4, BAZ2B, BAZ2A, SMARCA4	604	42	10057	5.15378	0.00159361	0.000531486	0.00564573
GOTERM_MF_DIRECT	GO:0070577~lysine-acetylated histone binding	8	0.747664	3.67941e-05	PHIP, TAF1, BAZ1B, KMT2A, BRD4, BAZ2A, ZMYND8, SMARCA4	971	18	16881	7.72674	0.0328933	0.00333906	0.057411
INTERPRO	IPR018359:Bromodomain, conserved site	9	0.841121	4.85168e-05	PHIP, TAF1, BRWD1, BAZ1B, BPTF, BRD4, BAZ2B, BAZ2A, SMARCA4	1011	26	18559	6.35437	0.0808668	0.00763653	0.0820163
UP_SEQ_FEATURE	domain:Bromo	8	0.747664	0.000550017	TRIM33, BAZ1B, BPTF, ASH1L, BAZ2B, BAZ2A, ZMYND8, SMARCA4	1037	29	20063	5.33715	0.836625	0.0586029	0.995961
UP_SEQ_FEATURE	domain:Bromo 2	4	0.373832	0.0212746	PHIP, TAF1, BRWD1, BRD4	1037	12	20063	6.44905	1	0.631152	32.3781
UP_SEQ_FEATURE	domain:Bromo 1	4	0.373832	0.0212746	PHIP, TAF1, BRWD1, BRD4	1037	12	20063	6.44905	1	0.631152	32.3781
Annotation Cluster 8	Enrichment Score: 3.424561349890918
Category	Term	Count	%	PValue	Genes	List Total	Pop Hits	Pop Total	Fold Enrichment	Bonferroni	Benjamini	FDR
INTERPRO	IPR018359:Bromodomain, conserved site	9	0.841121	4.85168e-05	PHIP, TAF1, BRWD1, BAZ1B, BPTF, BRD4, BAZ2B, BAZ2A, SMARCA4	1011	26	18559	6.35437	0.0808668	0.00763653	0.0820163
UP_SEQ_FEATURE	domain:DDT	5	0.46729	9.7518e-05	RSF1, BAZ1B, BPTF, BAZ2B, BAZ2A	1037	6	20063	16.1226	0.27468	0.0167602	0.177272
UP_SEQ_FEATURE	domain:Bromo	8	0.747664	0.000550017	TRIM33, BAZ1B, BPTF, ASH1L, BAZ2B, BAZ2A, ZMYND8, SMARCA4	1037	29	20063	5.33715	0.836625	0.0586029	0.995961
INTERPRO	IPR018501:DDT domain superfamily	4	0.373832	0.00147924	BAZ1B, BPTF, BAZ2B, BAZ2A	1011	5	18559	14.6857	0.92368	0.0977945	2.47236
SMART	SM00571:DDT	4	0.373832	0.00195795	BAZ1B, BPTF, BAZ2B, BAZ2A	604	5	10057	13.3205	0.537092	0.0621691	2.68977
Annotation Cluster 9	Enrichment Score: 3.288382145877618
Category	Term	Count	%	PValue	Genes	List Total	Pop Hits	Pop Total	Fold Enrichment	Bonferroni	Benjamini	FDR
UP_KEYWORDS	Zinc	169	15.7944	2.22892e-06	LMO4, PDLIM4, ZNF451, RBM4, RBM5, RNF216, ZNF638, COX5B, RNF213, APP, GRIN2B, TRIM44, ZNF302, ZNF397, ANKZF1, RPS27A, POLK, ZNF644, UBR4, ZNF791, MTA1, NPEPPS, MECOM, PCLO, ZNF3, TRIM38, NAPEPLD, RPAIN, ACAP3, BAZ1B, TRIM33, MTF2, UBR5, TRMT13, ACAP2, ZNHIT1, PIAS2, ZNF431, PIAS1, ANKFY1, FUS, TSHZ2, CALR, ZNF618, MYO9A, ZMYND8, TTC3, TRIM73, ZFC3H1, RPS27, RPS29, PRR3, ZNF326, ZNF224, DMD, EWSR1…	1047	2348	20581	1.41484	0.000966886	4.2058e-05	0.00314576
UP_KEYWORDS	Zinc-finger	135	12.6168	2.2732e-06	ZNF451, RBM4, RBM5, RNF216, ZNF638, RNF213, TRIM44, ZNF302, ZNF397, ANKZF1, RPS27A, POLK, ZNF644, UBR4, ZNF791, MTA1, MECOM, PCLO, ZNF3, TRIM38, RPAIN, ACAP3, BAZ1B, TRIM33, MTF2, TRMT13, UBR5, ACAP2, ZNHIT1, PIAS2, ZNF431, PIAS1, ANKFY1, FUS, TSHZ2, ZMYND8, MYO9A, TTC3, TRIM73, ZFC3H1, RPS27, PRR3, ZNF326, ZNF224, DMD, EWSR1, ZC3H14, PLAG1, ZC3H13, DNMT3A, ZMYM2, SHPRH, ZMYM4, WHSC1, TRIM56, PHF…	1047	1781	20581	1.49001	0.000986084	4.11062e-05	0.00320825
UP_KEYWORDS	Metal-binding	225	21.028	0.000872205	S100A4, S100A6, PDLIM4, RNF216, ZNF638, RNF213, ATP2B1, APP, MAP3K4, GRIN2B, PLOD3, ZNF397, MAP2K7, S100A2, FTL, POLK, ZNF644, UBR4, ZNF791, MECOM, PCLO, NAPEPLD, ACAP3, BAZ1B, MTF2, UBR5, TRMT13, ACAP2, ZNHIT1, PIAS2, PIAS1, FUS, CALR, ZNF618, MYO9A, CALU, RPS27, RPS29, MACF1, ZNF224, DMD, ZC3H14, PLAG1, DNMT3A, ZC3H13, ADAL, SMAD5, S100A11, ZFHX4, SRSF7, TRPS1, HGS, ZNF117, RERE, ADAR, ZNF292, …	1047	3640	20581	1.21507	0.315251	0.00897619	1.22398
GOTERM_MF_DIRECT	GO:0008270~zinc ion binding	86	8.03738	0.0138408	S100A6, SPG7, RSF1, LTN1, LMO4, RBM4, PDLIM4, RBM5, ZNF638, RNF213, ZNF207, LNPEP, GRIN2B, TRIM44, KDM5A, NR2F2, GATAD1, KDM5B, KPNB1, EGR1, ZCCHC11, SF1, UBR4, MTA1, ZSWIM8, NPEPPS, HERC2, MMP14, RBBP6, ZNF3, GTF2H2, TRIM38, NAPEPLD, BPTF, TRIM33, BAZ1B, MTF2, LIMCH1, UBR5, ASH1L, PIAS2, MDM4, PIAS1, USP22, NSD1, PMPCB, KMT2E, FUS, KMT2A, KMT2C, CALR, ZMYND8, TTC3, TRIM73, MYCBP2, RPS27, SCAF11,…	971	1169	16881	1.27898	0.999997	0.277365	19.5496
GOTERM_MF_DIRECT	GO:0046872~metal ion binding	118	11.028	0.590984	ZNF451, EIF5B, RNF216, COX5B, ATP2B1, MAP3K4, ZNF302, ZNF397, ANKZF1, RPS27A, POLK, ZNF644, ZNF791, MECOM, ZNF3, RPAIN, ACAP3, TRMT13, ACAP2, COL1A2, ZNHIT1, ZNF431, COL1A1, ANKFY1, TSHZ2, LMAN1, MYO9A, ITGB1, ZNF618, EXTL2, ZFC3H1, CEPT1, PRR3, ZNF326, ZNF224, HECTD1, ZC3H14, PLAG1, ZC3H13, DNMT3A, ADAL, SMAD5, SMG1, ZFHX4, EBF2, TRPS1, EBF1, HGS, RPL37A, HDAC9, CACNA1C, ZNF117, GPATCH8, HDAC7, …	971	2069	16881	0.991518	1	0.99435	99.9999
Annotation Cluster 10	Enrichment Score: 3.2702335918314116
Category	Term	Count	%	PValue	Genes	List Total	Pop Hits	Pop Total	Fold Enrichment	Bonferroni	Benjamini	FDR
GOTERM_CC_DIRECT	GO:0005753~mitochondrial proton-transporting ATP synthase complex	10	0.934579	6.96697e-07	ATP5D, ATP5E, USMG5, ATP5J2, ATP5O, ATP5G2, ATP5I, C14ORF2, ATP5H, ATP5J	1000	21	18224	8.6781	0.000468071	2.46408e-05	0.00104492
GOTERM_BP_DIRECT	GO:0042776~mitochondrial ATP synthesis coupled proton transport	9	0.841121	1.16491e-05	ATP5D, ATP5E, ATP5J2, ATP5O, ATP5G2, ATP5I, COX5B, ATP5H, ATP5J	962	21	16792	7.48084	0.0372194	0.00222867	0.0211654
GOTERM_BP_DIRECT	GO:0006754~ATP biosynthetic process	10	0.934579	2.24389e-05	ALDOA, PKM, ATP5D, ATP5E, ATP5J2, ATP5O, ATP5G2, ATP5I, ATP5H, ATP5J	962	29	16792	6.01907	0.0704567	0.00364643	0.0407657
GOTERM_CC_DIRECT	GO:0000276~mitochondrial proton-transporting ATP synthase complex, coupling factor F(o)	6	0.560748	0.000280764	ATP5J2, ATP5G2, ATP5I, ATP5H, MON2, ATP5J	1000	12	18224	9.112	0.171965	0.00854058	0.420268
UP_KEYWORDS	CF(0)	6	0.560748	0.000457438	ATP5J2, ATP5G2, ATP5I, ATP5H, MON2, ATP5J	1047	14	20581	8.42448	0.1801	0.00565746	0.643675
UP_KEYWORDS	Hydrogen ion transport	10	0.934579	0.00071497	ATP5D, ATP5E, ATP5J2, ATP5O, ATP5G2, ATP5I, ATP5H, MON2, ATP6V1F, ATP5J	1047	49	20581	4.01166	0.266852	0.00773017	1.00436
UP_KEYWORDS	ATP synthesis	6	0.560748	0.000916632	ATP5D, ATP5E, ATP5J2, ATP5O, ATP5I, MON2	1047	16	20581	7.37142	0.328338	0.00921313	1.28595
GOTERM_MF_DIRECT	GO:0022857~transmembrane transporter activity	9	0.841121	0.0063749	ATP5D, ATP5E, ATP5J2, SLC2A11, ATP5O, ATP5I, ATP5H, SEC61A1, ATP5J	971	49	16881	3.19319	0.997013	0.176159	9.49951
GOTERM_BP_DIRECT	GO:0015986~ATP synthesis coupled proton transport	6	0.560748	0.00707367	ATP5D, ATP5O, ATP5G2, ATP5H, MON2, ATP5J	962	22	16792	4.76054	1	0.274594	12.1019
GOTERM_MF_DIRECT	GO:0046933~proton-transporting ATP synthase activity, rotational mechanism	5	0.46729	0.0141319	ATP5D, ATP5E, ATP5O, ATP5G2, ATP5H	971	17	16881	5.11329	0.999998	0.276344	19.9195
GOTERM_MF_DIRECT	GO:0015078~hydrogen ion transmembrane transporter activity	5	0.46729	0.109048	ATP5I, ATP5H, MON2, ATP6V1F, ATP5J	971	32	16881	2.71643	1	0.739617	83.505
Annotation Cluster 11	Enrichment Score: 2.993779919595175
Category	Term	Count	%	PValue	Genes	List Total	Pop Hits	Pop Total	Fold Enrichment	Bonferroni	Benjamini	FDR
UP_SEQ_FEATURE	zinc finger region:PHD-type 3	7	0.654206	3.28049e-06	KMT2A, KMT2C, WHSC1L1, WHSC1, KDM5A, KDM5B, NSD1	1037	10	20063	13.543	0.0107445	0.00107968	0.00596822
UP_SEQ_FEATURE	domain:Post-SET	8	0.747664	7.27446e-06	KMT2A, KMT2C, WHSC1L1, ASH1L, WHSC1, SETD2, EHMT2, NSD1	1037	16	20063	9.67358	0.0236702	0.00184099	0.013234
SMART	SM00317:SET	12	1.1215	8.9332e-06	KMT2E, EHMT1, KMT2A, KMT2C, WHSC1L1, ASH1L, WHSC1, MECOM, SETD2, EHMT2, NSD1, SETD5	604	38	10057	5.2581	0.00350461	0.000877306	0.0124273
UP_SEQ_FEATURE	domain:AWS	5	0.46729	3.38988e-05	WHSC1L1, ASH1L, WHSC1, SETD2, NSD1	1037	5	20063	19.3472	0.105625	0.00741442	0.0616561
INTERPRO	IPR006560:AWS	5	0.46729	4.17193e-05	WHSC1L1, ASH1L, WHSC1, SETD2, NSD1	1011	5	18559	18.3571	0.0699432	0.00722474	0.0705291
SMART	SM00570:AWS	5	0.46729	6.09654e-05	WHSC1L1, ASH1L, WHSC1, SETD2, NSD1	604	5	10057	16.6507	0.0236754	0.00478056	0.084783
INTERPRO	IPR001214:SET domain	12	1.1215	7.50565e-05	KMT2E, EHMT1, KMT2A, KMT2C, WHSC1L1, ASH1L, WHSC1, MECOM, SETD2, EHMT2, NSD1, SETD5	1011	51	18559	4.31931	0.122302	0.0092748	0.126854
INTERPRO	IPR003616:Post-SET domain	7	0.654206	0.000127847	KMT2A, KMT2C, WHSC1L1, ASH1L, WHSC1, SETD2, NSD1	1011	16	18559	8.03122	0.199254	0.0122692	0.215985
UP_SEQ_FEATURE	domain:SET	11	1.02804	0.000168259	KMT2E, EHMT1, KMT2A, KMT2C, WHSC1L1, ASH1L, WHSC1, SETD2, EHMT2, NSD1, SETD5	1037	49	20063	4.34324	0.425425	0.0248729	0.305682
GOTERM_MF_DIRECT	GO:0018024~histone-lysine N-methyltransferase activity	10	0.934579	0.000291842	KMT2E, EHMT1, KMT2A, KMT2C, WHSC1L1, WHSC1, MECOM, SETD2, EHMT2, NSD1	971	39	16881	4.45774	0.233042	0.0187732	0.454523
KEGG_PATHWAY	hsa00310:Lysine degradation	12	1.1215	0.000541707	KMT2E, EHMT1, KMT2A, PLOD3, KMT2C, WHSC1L1, ASH1L, WHSC1, SETD2, EHMT2, NSD1, PHYKPL	463	52	6879	3.42864	0.126689	0.0149388	0.701448
SMART	SM00508:PostSET	6	0.560748	0.00065507	KMT2A, KMT2C, WHSC1L1, WHSC1, SETD2, NSD1	604	13	10057	7.68492	0.227039	0.0282086	0.907503
UP_KEYWORDS	Methyltransferase	21	1.96262	0.00201139	KMT2E, DNMT3A, RNMT, EHMT1, KMT2A, KMT2C, WHSC1, EHMT2, METTL2B, TARBP1, NSUN6, PRMT2, TRMT13, WHSC1L1, ASH1L, PCMTD1, SETD2, NSD1, NSUN5, METTL17, NNMT	1047	193	20581	2.13886	0.582648	0.0184202	2.80166
UP_KEYWORDS	S-adenosyl-L-methionine	19	1.7757	0.00334786	KMT2E, DNMT3A, RNMT, EHMT1, KMT2A, KMT2C, WHSC1, EHMT2, METTL2B, TARBP1, NSUN6, PRMT2, TRMT13, WHSC1L1, ASH1L, SETD2, NSD1, NSUN5, NNMT	1047	174	20581	2.14647	0.766695	0.0298659	4.62269
UP_SEQ_FEATURE	binding site:S-adenosyl-L-methionine	9	0.841121	0.00433787	NSUN6, PRMT2, RNMT, EHMT1, KMT2A, KMT2C, EHMT2, NSUN5, NNMT	1037	51	20063	3.4142	0.999999	0.27773	7.6046
UP_SEQ_FEATURE	zinc finger region:PHD-type 4; atypical	3	0.280374	0.00771731	WHSC1L1, WHSC1, NSD1	1037	3	20063	19.3472	1	0.382053	13.1467
UP_SEQ_FEATURE	domain:PWWP 2	3	0.280374	0.00771731	WHSC1L1, WHSC1, NSD1	1037	3	20063	19.3472	1	0.382053	13.1467
UP_SEQ_FEATURE	domain:PWWP 1	3	0.280374	0.00771731	WHSC1L1, WHSC1, NSD1	1037	3	20063	19.3472	1	0.382053	13.1467
UP_SEQ_FEATURE	region of interest:S-adenosyl-L-methionine binding	7	0.654206	0.00838095	NSUN6, EHMT1, KMT2A, KMT2C, EHMT2, NSUN5, NNMT	1037	35	20063	3.86943	1	0.395833	14.1975
GOTERM_BP_DIRECT	GO:0016571~histone methylation	5	0.46729	0.0139392	PRMT2, EHMT1, WHSC1L1, EHMT2, NSD1	962	17	16792	5.13391	1	0.435219	22.5138
SMART	SM00293:PWWP	5	0.46729	0.028757	DNMT3A, WHSC1L1, WHSC1, NSD1, ZMYND8	604	20	10057	4.16267	0.99999	0.511639	33.365
INTERPRO	IPR000313:PWWP	5	0.46729	0.029111	DNMT3A, WHSC1L1, WHSC1, NSD1, ZMYND8	1011	22	18559	4.17206	1	0.680508	39.3234
GOTERM_MF_DIRECT	GO:0046975~histone methyltransferase activity (H3-K36 specific)	3	0.280374	0.0423846	ASH1L, SETD2, NSD1	971	6	16881	8.69258	1	0.504902	49.1326
GOTERM_MF_DIRECT	GO:0042800~histone methyltransferase activity (H3-K4 specific)	4	0.373832	0.0810436	KMT2E, KMT2A, KMT2C, ASH1L	971	18	16881	3.86337	1	0.6611	73.2623
GOTERM_BP_DIRECT	GO:0051568~histone H3-K4 methylation	4	0.373832	0.103204	KMT2E, KMT2A, KMT2C, ASH1L	962	20	16792	3.49106	1	0.888004	86.1834
Annotation Cluster 12	Enrichment Score: 2.96658172743257
Category	Term	Count	%	PValue	Genes	List Total	Pop Hits	Pop Total	Fold Enrichment	Bonferroni	Benjamini	FDR
GOTERM_BP_DIRECT	GO:0031124~mRNA 3'-end processing	12	1.1215	9.69394e-05	PABPN1, SRSF2, PAPOLA, SRSF5, CHTOP, CSTF3, SRSF7, DDX39B, SRSF11, SRRM1, ZC3H11A, THOC2	962	50	16792	4.18927	0.270685	0.013066	0.176001
GOTERM_BP_DIRECT	GO:0006369~termination of RNA polymerase II transcription	13	1.21495	0.000239218	PABPN1, CSTF3, CHTOP, SRSF11, DDX39B, SETX, SRSF2, PAPOLA, SRSF5, SRSF7, SRRM1, ZC3H11A, THOC2	962	64	16792	3.54561	0.54113	0.0265041	0.43379
GOTERM_BP_DIRECT	GO:0006406~mRNA export from nucleus	16	1.49533	0.000544504	CHTOP, SRSF10, NUP160, DDX39B, SRSF11, HNRNPA2B1, EIF5A, SMG1, SRSF2, SRSF5, SRSF7, SRRM1, ZC3H11A, NUP107, TPR, THOC2	962	100	16792	2.79285	0.830243	0.0467989	0.984802
GOTERM_BP_DIRECT	GO:0006405~RNA export from nucleus	10	0.934579	0.00374363	SRSF2, SRSF5, CHTOP, SRSF7, DDX39B, SRSF11, SRRM1, ZC3H11A, TPR, THOC2	962	55	16792	3.17369	0.999995	0.178785	6.58824
GOTERM_CC_DIRECT	GO:0000346~transcription export complex	4	0.373832	0.0310816	CHTOP, DDX39B, ZC3H11A, THOC2	1000	13	18224	5.60738	1	0.302067	37.7222
Annotation Cluster 13	Enrichment Score: 2.741471860496381
Category	Term	Count	%	PValue	Genes	List Total	Pop Hits	Pop Total	Fold Enrichment	Bonferroni	Benjamini	FDR
UP_SEQ_FEATURE	domain:ARID	6	0.560748	0.000706925	ARID4B, ARID1A, ARID1B, KDM5A, KDM5B, ARID2	1037	15	20063	7.73886	0.90258	0.0723681	1.27836
INTERPRO	IPR001606:ARID/BRIGHT DNA-binding domain	6	0.560748	0.000897343	ARID4B, ARID1A, ARID1B, KDM5A, KDM5B, ARID2	1011	15	18559	7.34283	0.789923	0.0655885	1.50673
SMART	SM00501:BRIGHT	6	0.560748	0.0013825	ARID4B, ARID1A, ARID1B, KDM5A, KDM5B, ARID2	604	15	10057	6.66026	0.419402	0.0529181	1.90629
GOTERM_CC_DIRECT	GO:0090544~BAF-type complex	4	0.373832	0.00289854	SMARCC2, ARID1A, ARID1B, ARID2	1000	6	18224	12.1493	0.857818	0.0650513	4.26019
UP_SEQ_FEATURE	short sequence motif:LXXLL	3	0.280374	0.00771731	ARID1A, ARID1B, ARID2	1037	3	20063	19.3472	1	0.382053	13.1467
Annotation Cluster 14	Enrichment Score: 2.726173433959801
Category	Term	Count	%	PValue	Genes	List Total	Pop Hits	Pop Total	Fold Enrichment	Bonferroni	Benjamini	FDR
GOTERM_BP_DIRECT	GO:0030198~extracellular matrix organization	26	2.42991	0.000142717	PXDN, COL3A1, VIT, ITGB1, DDR2, APP, ITGB8, TGFBI, COL6A3, COL6A2, COL6A1, FBN2, LAMB1, FN1, CYR61, BSG, NF1, SPARC, COL5A2, COL5A1, FBLN1, LAMA4, COL14A1, COL1A2, VCAN, COL1A1	962	196	16792	2.3155	0.371689	0.0170646	0.259012
UP_KEYWORDS	Extracellular matrix	27	2.52336	0.000712851	PXDN, LTBP4, COL3A1, SPOCK1, CALR, VIT, LGALS3BP, LECT1, HMCN1, CTGF, TGFBI, COL6A3, COL6A2, COL6A1, FBN2, LAMB1, FN1, LGALS1, SPARC, COL5A2, COL5A1, FBLN1, LAMA4, COL14A1, COL1A2, VCAN, COL1A1	1047	258	20581	2.05714	0.266177	0.00790418	1.0014
GOTERM_MF_DIRECT	GO:0005201~extracellular matrix structural constituent	12	1.1215	0.00141726	LAMA4, FBLN1, PXDN, COL14A1, COL3A1, COL1A2, VCAN, COL1A1, FBN2, LAMB1, COL5A2, COL5A1	971	67	16881	3.11376	0.72451	0.0595443	2.18924
GOTERM_CC_DIRECT	GO:0005578~proteinaceous extracellular matrix	25	2.33645	0.0125876	GLG1, PXDN, LTBP1, LTBP4, SPOCK1, CALR, VIT, LGALS3BP, GPC3, LECT1, CTGF, TGFBI, COL6A3, COL6A2, FBN2, CYR61, FN1, LGALS1, SPARC, COL5A2, COL5A1, FBLN1, COL14A1, COL1A2, VCAN	1000	268	18224	1.7	0.999799	0.168942	17.3033
KEGG_PATHWAY	hsa04512:ECM-receptor interaction	13	1.21495	0.0128903	LAMA4, ITGB8, COL3A1, COL6A3, COL1A2, COL6A2, COL6A1, COL1A1, LAMB1, ITGB1, COL5A2, COL5A1, FN1	463	87	6879	2.22008	0.960974	0.255369	15.5108
Annotation Cluster 15	Enrichment Score: 2.671338630722222
Category	Term	Count	%	PValue	Genes	List Total	Pop Hits	Pop Total	Fold Enrichment	Bonferroni	Benjamini	FDR
KEGG_PATHWAY	hsa05010:Alzheimer's disease	29	2.71028	5.76085e-06	ATP5D, NDUFB4, ATP5E, COX7B, COX7C, ATP5G2, UQCRQ, COX5B, APP, UQCR11, GRIN2B, COX6B1, ATP5O, GAPDH, ATP5H, ATP5J, ADAM10, COX7A2, COX8A, CYCS, NDUFA13, COX4I1, NCSTN, LRP1, UQCRH, ADAM17, CACNA1C, CALM2, UQCRB	463	168	6879	2.56468	0.00143918	0.000359989	0.00748363
KEGG_PATHWAY	hsa05012:Parkinson's disease	23	2.14953	0.000176898	ATP5D, NDUFB4, ATP5E, COX7A2, SLC25A6, COX7B, COX8A, CYCS, UBE2G2, COX7C, NDUFA13, COX4I1, ATP5G2, UQCRQ, COX5B, UQCR11, UQCRH, COX6B1, ATP5O, UBB, ATP5H, ATP5J, UQCRB	463	142	6879	2.40649	0.0432647	0.00880669	0.229564
KEGG_PATHWAY	hsa05016:Huntington's disease	28	2.61682	0.000181507	ATP5D, NDUFB4, ATP5E, AP2S1, COX7B, COX7C, ATP5G2, UQCRQ, COX5B, AP2B1, UQCR11, GRIN2B, COX6B1, ATP5O, ATP5H, ATP5J, COX7A2, SLC25A6, COX8A, CYCS, NDUFA13, COX4I1, CREB5, SOD1, POLR2J3, SOD2, UQCRH, UQCRB	463	192	6879	2.16671	0.0443666	0.00753496	0.235539
KEGG_PATHWAY	hsa00190:Oxidative phosphorylation	22	2.05607	0.000188535	ATP5D, NDUFB4, ATP5E, ATP5J2, COX7A2, COX7B, COX8A, COX7C, NDUFA13, COX4I1, ATP5G2, UQCRQ, COX5B, ATP6V1F, UQCR11, UQCRH, COX6B1, ATP5O, ATP5I, ATP5H, UQCRB, ATP5J	463	133	6879	2.45762	0.0460444	0.00671139	0.244648
KEGG_PATHWAY	hsa04260:Cardiac muscle contraction	15	1.40187	0.000392131	COX7A2, CACNG8, COX7B, COX8A, COX7C, COX4I1, ATP1A1, COX5B, UQCRQ, TPM1, UQCR11, UQCRH, COX6B1, CACNA1C, UQCRB	463	75	6879	2.97149	0.0933982	0.0121817	0.50822
GOTERM_BP_DIRECT	GO:0006123~mitochondrial electron transport, cytochrome c to oxygen	7	0.654206	0.000669698	CYCS, COX7B, COX8A, COX7C, COX6B1, COX4I1, COX5B	962	20	16792	6.10936	0.887102	0.0557853	1.20993
GOTERM_MF_DIRECT	GO:0004129~cytochrome-c oxidase activity	8	0.747664	0.00128416	C15ORF48, COX7A2, COX7B, COX8A, COX7C, COX6B1, COX4I1, COX5B	971	30	16881	4.63605	0.689029	0.05673	1.98557
UP_KEYWORDS	Mitochondrion inner membrane	27	2.52336	0.00138461	ATP5D, NDUFB4, ATP5E, COA1, COX7B, COX7C, UQCRQ, COX5B, RPS3, UQCR11, EXOG, ATP5O, ATP5I, ATP5H, ATP5J, ATP5J2, COX7A2, SLC25A6, COX8A, NDUFA13, COX4I1, TTC19, ACADVL, UQCRH, SLC25A36, SLC25A37, UQCRB	1047	270	20581	1.96571	0.451922	0.0129875	1.93654
GOTERM_BP_DIRECT	GO:1902600~hydrogen ion transmembrane transport	11	1.02804	0.00226202	C15ORF48, COX7A2, UQCR11, UQCRH, COX7B, COX8A, COX7C, COX6B1, COX4I1, UQCRQ, UQCRB	962	61	16792	3.14768	0.999372	0.127634	4.03144
GOTERM_CC_DIRECT	GO:0005751~mitochondrial respiratory chain complex IV	5	0.46729	0.00430803	C15ORF48, COX8A, COX7C, COX4I1, COX5B	1000	13	18224	7.00923	0.945045	0.0817916	6.27003
KEGG_PATHWAY	hsa04932:Non-alcoholic fatty liver disease (NAFLD)	18	1.68224	0.0242393	NDUFB4, COX7A2, COX7B, COX8A, CYCS, COX7C, NDUFA13, COX4I1, COX5B, UQCRQ, UQCR11, UQCRH, COX6B1, PRKAA2, IKBKB, PIK3R1, AKT2, UQCRB	463	151	6879	1.77109	0.997833	0.376173	27.2958
GOTERM_CC_DIRECT	GO:0005743~mitochondrial inner membrane	32	2.99065	0.094163	ATP5D, NDUFB4, COX7B, COX7C, UQCRQ, COX5B, SFXN5, RPS3, UQCR11, GSTK1, COX6B1, EXOG, ATP5O, ATP5I, ATP5H, ATP5J, ATP5J2, LGALS3, SLC25A6, COX8A, CYCS, NDUFA13, COX4I1, MRPS6, HERC2, TTC19, SOD2, ACADVL, UQCRH, SLC25A36, SLC25A37, UQCRB	1000	441	18224	1.32238	1	0.550985	77.3103
UP_SEQ_FEATURE	topological domain:Mitochondrial intermembrane	5	0.46729	0.268976	TOMM7, COX7B, COX8A, COX7C, SYNJ2BP	1037	51	20063	1.89678	1	0.999336	99.6655
UP_SEQ_FEATURE	topological domain:Mitochondrial matrix	3	0.280374	0.409843	COX7B, COX8A, COX7C	1037	27	20063	2.14968	1	0.999983	99.9932
Annotation Cluster 16	Enrichment Score: 2.3093380009009876
Category	Term	Count	%	PValue	Genes	List Total	Pop Hits	Pop Total	Fold Enrichment	Bonferroni	Benjamini	FDR
INTERPRO	IPR002483:PWI domain	4	0.373832	0.00147924	SRRM1, PRPF3, RBM25, RBM26	1011	5	18559	14.6857	0.92368	0.0977945	2.47236
UP_SEQ_FEATURE	domain:PWI	3	0.280374	0.00771731	SRRM1, PRPF3, RBM25	1037	3	20063	19.3472	1	0.382053	13.1467
SMART	SM00311:PWI	3	0.280374	0.0103391	SRRM1, PRPF3, RBM25	604	3	10057	16.6507	0.983167	0.23837	13.4621
Annotation Cluster 17	Enrichment Score: 2.297115486782826
Category	Term	Count	%	PValue	Genes	List Total	Pop Hits	Pop Total	Fold Enrichment	Bonferroni	Benjamini	FDR
INTERPRO	IPR001650:Helicase, C-terminal	18	1.68224	7.15965e-05	SHPRH, ERCC6L2, DDX39B, DICER1, YTHDC2, DDX5, ATRX, CHD9, DDX17, CHD7, DDX46, SNRNP200, CHD2, DHX15, DHX36, CHD4, HELLS, SMARCA4	1011	108	18559	3.05951	0.117008	0.00952657	0.12101
INTERPRO	IPR014001:Helicase, superfamily 1/2, ATP-binding domain	18	1.68224	9.05831e-05	SHPRH, ERCC6L2, DDX39B, DICER1, YTHDC2, DDX5, ATRX, CHD9, DDX17, CHD7, DDX46, SNRNP200, CHD2, DHX15, DHX36, CHD4, HELLS, SMARCA4	1011	110	18559	3.00388	0.145672	0.00979178	0.153077
UP_KEYWORDS	Helicase	20	1.86916	0.000117522	SHPRH, ERCC6L2, DDX39B, DICER1, YTHDC2, DDX5, SETX, ATRX, CHD9, DDX17, CHD7, DDX46, MCM7, SNRNP200, CHD2, DHX15, DHX36, CHD4, HELLS, SMARCA4	1047	143	20581	2.74925	0.0497283	0.00154448	0.165737
UP_SEQ_FEATURE	domain:Helicase C-terminal	17	1.58879	0.000131851	SHPRH, ERCC6L2, DDX39B, DICER1, YTHDC2, DDX5, ATRX, CHD9, DDX17, CHD7, DDX46, CHD2, DHX15, DHX36, CHD4, HELLS, SMARCA4	1037	108	20063	3.04539	0.352227	0.0214767	0.239613
SMART	SM00490:HELICc	18	1.68224	0.000196088	SHPRH, ERCC6L2, DDX39B, DICER1, YTHDC2, DDX5, ATRX, CHD9, DDX17, CHD7, DDX46, SNRNP200, CHD2, DHX15, DHX36, CHD4, HELLS, SMARCA4	604	107	10057	2.80105	0.0741751	0.0109496	0.272457
INTERPRO	IPR000330:SNF2-related	9	0.841121	0.000244108	ATRX, CHD9, CHD7, SHPRH, ERCC6L2, CHD2, CHD4, HELLS, SMARCA4	1011	32	18559	5.16293	0.34578	0.0220847	0.412017
SMART	SM00487:DEXDc	18	1.68224	0.000246547	SHPRH, ERCC6L2, DDX39B, DICER1, YTHDC2, DDX5, ATRX, CHD9, DDX17, CHD7, DDX46, SNRNP200, CHD2, DHX15, DHX36, CHD4, HELLS, SMARCA4	604	109	10057	2.74965	0.0923576	0.01204	0.342456
UP_SEQ_FEATURE	domain:Helicase ATP-binding	16	1.49533	0.000773041	ERCC6L2, DDX39B, DICER1, YTHDC2, DDX5, ATRX, CHD9, DDX17, CHD7, DDX46, CHD2, DHX15, DHX36, HELLS, CHD4, SMARCA4	1037	114	20063	2.71539	0.921653	0.0764972	1.39713
UP_SEQ_FEATURE	short sequence motif:DEAH box	9	0.841121	0.00142093	CHD9, CHD7, ERCC6L2, CHD2, DHX15, DHX36, YTHDC2, CHD4, HELLS	1037	43	20063	4.0494	0.990744	0.121964	2.55384
GOTERM_MF_DIRECT	GO:0004386~helicase activity	11	1.02804	0.0236082	ATRX, CHD9, DDX17, CHD7, SHPRH, DICER1, SNRNP200, CHD2, DHX36, HELLS, SMARCA4	971	85	16881	2.24985	1	0.363927	31.1255
GOTERM_MF_DIRECT	GO:0008186~RNA-dependent ATPase activity	3	0.280374	0.0293623	DDX17, DDX39B, YTHDC2	971	5	16881	10.4311	1	0.4183	37.195
INTERPRO	IPR011545:DNA/RNA helicase, DEAD/DEAH box type, N-terminal	9	0.841121	0.0332278	DDX17, DDX46, DDX39B, DICER1, SNRNP200, DHX15, DHX36, YTHDC2, DDX5	1011	69	18559	2.3944	1	0.713381	43.5306
GOTERM_MF_DIRECT	GO:0004004~ATP-dependent RNA helicase activity	8	0.747664	0.0784765	DDX17, DDX46, DDX39B, SNRNP200, DHX15, DHX36, YTHDC2, DDX5	971	65	16881	2.13971	1	0.65927	72.0724
GOTERM_MF_DIRECT	GO:0003724~RNA helicase activity	3	0.280374	0.169421	DDX17, DHX15, DDX5	971	13	16881	4.01196	1	0.837066	94.4826
INTERPRO	IPR011709:Domain of unknown function DUF1605	3	0.280374	0.23583	DHX15, DHX36, YTHDC2	1011	17	18559	3.23948	1	0.993787	98.9417
INTERPRO	IPR007502:Helicase-associated domain	3	0.280374	0.256404	DHX15, DHX36, YTHDC2	1011	18	18559	3.05951	1	0.995821	99.333
SMART	SM00847:SM00847	3	0.280374	0.294176	DHX15, DHX36, YTHDC2	604	18	10057	2.77511	1	0.95229	99.2147
INTERPRO	IPR027417:P-loop containing nucleoside triphosphate hydrolase	47	4.39252	0.632234	RHOJ, SBNO1, SPG7, DYNC1LI2, RAD51B, ERCC6L2, FIGNL1, YLPM1, DICER1, EIF5B, ARHGAP35, MYO9A, RNF213, SETX, CHD9, N4BP2L2, DDX17, CHD7, MCM7, DDX46, ARHGAP5, DHX15, CHD2, DHX36, ABCD4, DYNC1H1, KIAA1683, HELLS, CHD4, DLG1, RHOBTB3, EEF1A1, SHPRH, RAN, DDX39B, YTHDC2, DDX5, NLRP1, RAD50, ATRX, PNKP, CBWD1, KIF1B, AQR, SNRNP200, NAIP, SMARCA4	1011	879	18559	0.98155	1	0.999997	100
Annotation Cluster 18	Enrichment Score: 2.2478287689749155
Category	Term	Count	%	PValue	Genes	List Total	Pop Hits	Pop Total	Fold Enrichment	Bonferroni	Benjamini	FDR
INTERPRO	IPR001005:SANT/Myb domain	11	1.02804	8.06709e-05	DMTF1, SMARCC1, BDP1, SMARCC2, TTF1, MTA1, DNAJC2, NCOR1, MYSM1, RERE, TERF1	1011	43	18559	4.696	0.130826	0.00930389	0.136337
SMART	SM00717:SANT	11	1.02804	0.000176068	DMTF1, SMARCC1, BDP1, SMARCC2, TTF1, MTA1, DNAJC2, NCOR1, MYSM1, RERE, TERF1	604	43	10057	4.25947	0.0668609	0.0114672	0.244672
INTERPRO	IPR017884:SANT domain	7	0.654206	0.00230265	SMARCC1, SMARCC2, MTA1, DNAJC2, NCOR1, MYSM1, RERE	1011	26	18559	4.94229	0.981805	0.12502	3.82355
UP_SEQ_FEATURE	domain:SANT	5	0.46729	0.0147101	SMARCC1, SMARCC2, MTA1, MYSM1, RERE	1037	19	20063	5.09136	1	0.539114	23.6328
UP_SEQ_FEATURE	domain:SWIRM	3	0.280374	0.0347768	SMARCC1, SMARCC2, MYSM1	1037	6	20063	9.67358	1	0.754467	47.4801
INTERPRO	IPR007526:SWIRM domain	3	0.280374	0.0383355	SMARCC1, SMARCC2, MYSM1	1011	6	18559	9.17854	1	0.750048	48.3693
INTERPRO	IPR009057:Homeodomain-like	22	2.05607	0.287122	TSHZ2, RABGAP1, POGZ, BDP1, TTF1, MTA1, GON4L, HOXC6, ZFHX4, MEIS2, PAX9, DMTF1, SMARCC1, SMARCC2, CHD2, PBX1, CUX1, DNAJC2, NCOR1, RERE, MYSM1, TERF1	1011	336	18559	1.20195	1	0.997527	99.6732
Annotation Cluster 19	Enrichment Score: 2.2210971876825325
Category	Term	Count	%	PValue	Genes	List Total	Pop Hits	Pop Total	Fold Enrichment	Bonferroni	Benjamini	FDR
INTERPRO	IPR000330:SNF2-related	9	0.841121	0.000244108	ATRX, CHD9, CHD7, SHPRH, ERCC6L2, CHD2, CHD4, HELLS, SMARCA4	1011	32	18559	5.16293	0.34578	0.0220847	0.412017
UP_SEQ_FEATURE	short sequence motif:DEAH box	9	0.841121	0.00142093	CHD9, CHD7, ERCC6L2, CHD2, DHX15, DHX36, YTHDC2, CHD4, HELLS	1037	43	20063	4.0494	0.990744	0.121964	2.55384
INTERPRO	IPR000953:Chromo domain/shadow	8	0.747664	0.00170148	CHD9, CHD7, SMARCC1, SMARCC2, CHD2, MPHOSPH8, CHD4, CBX6	1011	33	18559	4.4502	0.948165	0.103823	2.83879
SMART	SM00298:CHROMO	8	0.747664	0.00292558	CHD9, CHD7, SMARCC1, SMARCC2, CHD2, MPHOSPH8, CHD4, CBX6	604	33	10057	4.03652	0.683818	0.0847629	3.99414
INTERPRO	IPR016197:Chromo domain-like	7	0.654206	0.00686412	CHD9, CHD7, ARID4B, CHD2, MPHOSPH8, CHD4, CBX6	1011	32	18559	4.01561	0.999994	0.289671	10.9953
UP_SEQ_FEATURE	domain:Chromo 2	4	0.373832	0.00912099	CHD9, CHD7, CHD2, CHD4	1037	9	20063	8.59874	1	0.416557	15.3551
INTERPRO	IPR023780:Chromo domain	6	0.560748	0.0119562	CHD9, CHD7, CHD2, MPHOSPH8, CHD4, CBX6	1011	26	18559	4.23625	1	0.407038	18.4058
UP_SEQ_FEATURE	domain:Chromo 1	4	0.373832	0.0266151	CHD9, CHD7, CHD2, CHD4	1037	13	20063	5.95297	1	0.684517	38.7854
INTERPRO	IPR023779:Chromo domain, conserved site	3	0.280374	0.297567	CHD2, MPHOSPH8, CBX6	1011	20	18559	2.75356	1	0.997707	99.7454
Annotation Cluster 20	Enrichment Score: 2.2182566096300276
Category	Term	Count	%	PValue	Genes	List Total	Pop Hits	Pop Total	Fold Enrichment	Bonferroni	Benjamini	FDR
INTERPRO	IPR004088:K Homology domain, type 1	10	0.934579	0.000510338	FUBP1, KHDRBS1, KIAA0907, PCBP2, MEX3A, SF1, QKI, IGF2BP2, IGF2BP3, NOVA1	1011	44	18559	4.17206	0.58819	0.0433902	0.859551
INTERPRO	IPR004087:K Homology domain	9	0.841121	0.000849263	FUBP1, KHDRBS1, PCBP2, MEX3A, SF1, QKI, IGF2BP2, IGF2BP3, NOVA1	1011	38	18559	4.34773	0.771598	0.0649173	1.42655
SMART	SM00322:KH	9	0.841121	0.00156924	FUBP1, KHDRBS1, PCBP2, MEX3A, SF1, QKI, IGF2BP2, IGF2BP3, NOVA1	604	38	10057	3.94358	0.460546	0.0545638	2.16118
UP_SEQ_FEATURE	domain:KH 3	5	0.46729	0.0061046	FUBP1, PCBP2, IGF2BP2, IGF2BP3, NOVA1	1037	15	20063	6.44905	1	0.337352	10.5424
UP_SEQ_FEATURE	domain:KH 1	6	0.560748	0.00679761	FUBP1, PCBP2, MEX3A, IGF2BP2, IGF2BP3, NOVA1	1037	24	20063	4.83679	1	0.356228	11.6704
UP_SEQ_FEATURE	domain:KH 2	6	0.560748	0.00679761	FUBP1, PCBP2, MEX3A, IGF2BP2, IGF2BP3, NOVA1	1037	24	20063	4.83679	1	0.356228	11.6704
UP_SEQ_FEATURE	domain:KH 4	3	0.280374	0.0470444	FUBP1, IGF2BP2, IGF2BP3	1037	7	20063	8.29164	1	0.821787	58.3843
UP_SEQ_FEATURE	domain:KH	3	0.280374	0.198829	KHDRBS1, SF1, QKI	1037	16	20063	3.62759	1	0.996358	98.2282
Annotation Cluster 21	Enrichment Score: 2.1627885799099573
Category	Term	Count	%	PValue	Genes	List Total	Pop Hits	Pop Total	Fold Enrichment	Bonferroni	Benjamini	FDR
UP_SEQ_FEATURE	short sequence motif:Prevents secretion from ER	15	1.40187	2.02866e-06	P4HB, PDIA3, DNAJC10, PDIA6, CNPY2, PDIA4, CALR, PRKCSH, TMED9, SERPINH1, CALU, HSP90B1, HSPA5, FKBP10, RCN2	1037	61	20063	4.7575	0.00665811	0.000741988	0.00369079
GOTERM_BP_DIRECT	GO:0034976~response to endoplasmic reticulum stress	13	1.21495	0.00106779	CREBRF, P4HB, HSP90B1, CEBPB, PDIA3, TARDBP, FLOT1, DNAJC10, PDIA6, PDIA4, MBTPS1, PIK3R1, OS9	962	75	16792	3.02559	0.969149	0.0743896	1.92259
UP_SEQ_FEATURE	domain:Thioredoxin 1	5	0.46729	0.00115521	P4HB, PDIA3, DNAJC10, PDIA6, PDIA4	1037	10	20063	9.67358	0.97777	0.105911	2.081
UP_SEQ_FEATURE	domain:Thioredoxin 2	5	0.46729	0.00115521	P4HB, PDIA3, DNAJC10, PDIA6, PDIA4	1037	10	20063	9.67358	0.97777	0.105911	2.081
INTERPRO	IPR005788:Disulphide isomerase	4	0.373832	0.00147924	P4HB, PDIA3, PDIA6, PDIA4	1011	5	18559	14.6857	0.92368	0.0977945	2.47236
INTERPRO	IPR017937:Thioredoxin, conserved site	6	0.560748	0.0016882	P4HB, PDIA3, TXN, DNAJC10, PDIA6, PDIA4	1011	17	18559	6.47897	0.946953	0.1068	2.81693
INTERPRO	IPR012336:Thioredoxin-like fold	17	1.58879	0.00186893	P4HB, PDIA3, DNAJC10, PRDX5, PDIA6, CLIC1, PDIA4, PRDX1, GPX4, GSTK1, TXN, GPX8, FAF2, SH3BGRL3, UBXN7, UBXN4, MARS	1011	130	18559	2.40054	0.961274	0.109628	3.11404
GOTERM_CC_DIRECT	GO:0034663~endoplasmic reticulum chaperone complex	5	0.46729	0.00217128	P4HB, HSP90B1, DNAJC10, PDIA6, HSPA5	1000	11	18224	8.28364	0.767923	0.0546313	3.2075
UP_SEQ_FEATURE	site:Contributes to redox potential value	4	0.373832	0.00410791	P4HB, PDIA3, TXN, PDIA6	1037	7	20063	11.0555	0.999999	0.270385	7.21559
INTERPRO	IPR013766:Thioredoxin domain	8	0.747664	0.00613705	P4HB, PDIA3, TXN, DNAJC10, PDIA6, PRDX5, PDIA4, PRDX1	1011	41	18559	3.58187	0.999977	0.276904	9.88693
UP_KEYWORDS	Redox-active center	8	0.747664	0.0114083	P4HB, PDIA3, TXN, DNAJC10, PDIA6, PRDX5, PDIA4, PRDX1	1047	49	20581	3.20932	0.993124	0.0822742	14.9506
UP_SEQ_FEATURE	site:Lowers pKa of C-terminal Cys of second active site	3	0.280374	0.0149066	P4HB, PDIA3, PDIA6	1037	4	20063	14.5104	1	0.538265	23.9094
UP_SEQ_FEATURE	site:Lowers pKa of C-terminal Cys of first active site	3	0.280374	0.0149066	P4HB, PDIA3, PDIA6	1037	4	20063	14.5104	1	0.538265	23.9094
INTERPRO	IPR005792:Protein disulphide isomerase	3	0.280374	0.0164936	P4HB, PDIA3, PDIA4	1011	4	18559	13.7678	1	0.505891	24.5163
GOTERM_BP_DIRECT	GO:0045454~cell redox homeostasis	10	0.934579	0.0312983	P4HB, PDIA3, KRIT1, TXN, DNAJC10, PDIA6, PRDX5, SH3BGRL3, PDIA4, PRDX1	962	77	16792	2.26692	1	0.626956	43.8874
GOTERM_MF_DIRECT	GO:0003756~protein disulfide isomerase activity	4	0.373832	0.12952	P4HB, PDIA3, PDIA6, PDIA4	971	22	16881	3.16094	1	0.781097	88.5241
GOTERM_CC_DIRECT	GO:0005623~cell	9	0.841121	0.182387	P4HB, PDIA3, TRPM7, DNAJC10, SH3BGRL3, PDIA4, PRDX1, FTH1, FTL	1000	100	18224	1.64016	1	0.741583	95.1205
UP_SEQ_FEATURE	domain:Thioredoxin	3	0.280374	0.513965	TXN, PRDX5, PRDX1	1037	33	20063	1.75883	1	0.999999	99.9998
UP_SEQ_FEATURE	active site:Nucleophile	10	0.934579	0.687964	PUS7L, EYA4, P4HB, NSUN6, GANAB, PDIA3, TXN, PDIA6, GAPDH, NSUN5	1037	196	20063	0.9871	1	1	100
Annotation Cluster 22	Enrichment Score: 2.1241432606910484
Category	Term	Count	%	PValue	Genes	List Total	Pop Hits	Pop Total	Fold Enrichment	Bonferroni	Benjamini	FDR
GOTERM_BP_DIRECT	GO:0003281~ventricular septum development	9	0.841121	0.000124308	AP2B1, LTBP1, LMO4, PTK7, LUZP1, DCTN5, C5ORF42, TRIP11, CYR61	962	28	16792	5.61063	0.332872	0.0154476	0.225639
GOTERM_BP_DIRECT	GO:0060976~coronary vasculature development	6	0.560748	0.0123844	AP2B1, LTBP1, GPC3, PTK7, DCTN5, C5ORF42	962	25	16792	4.18927	1	0.405596	20.2633
GOTERM_BP_DIRECT	GO:0035904~aorta development	3	0.280374	0.275547	AP2B1, LTBP1, DCTN5	962	18	16792	2.90922	1	0.988289	99.7141
Annotation Cluster 23	Enrichment Score: 2.1233191471045565
Category	Term	Count	%	PValue	Genes	List Total	Pop Hits	Pop Total	Fold Enrichment	Bonferroni	Benjamini	FDR
GOTERM_BP_DIRECT	GO:0035194~posttranscriptional gene silencing by RNA	5	0.46729	0.000324563	TNRC6C, AGO1, AGO3, TNRC6B, TNRC6A	962	7	16792	12.4681	0.652486	0.0324902	0.588121
GOTERM_BP_DIRECT	GO:0035278~miRNA mediated inhibition of translation	6	0.560748	0.000343074	TNRC6C, RBM4, AGO1, AGO3, TNRC6B, TNRC6A	962	12	16792	8.72765	0.672819	0.0332891	0.621565
UP_KEYWORDS	RNA-mediated gene silencing	10	0.934579	0.00128606	ZCCHC11, TNRC6C, RBM4, DICER1, AGO1, CNOT2, AGO3, TNRC6B, TNRC6A, ADAR	1047	53	20581	3.70889	0.427938	0.0123346	1.79986
INTERPRO	IPR019486:Argonaute hook domain	3	0.280374	0.00855518	TNRC6C, TNRC6B, TNRC6A	1011	3	18559	18.3571	1	0.339529	13.5238
GOTERM_BP_DIRECT	GO:0007223~Wnt signaling pathway, calcium modulating pathway	7	0.654206	0.0223699	TNRC6C, AGO1, AGO3, TNRC6B, TNRC6A, TCF7L2, CALM2	962	39	16792	3.133	1	0.539483	33.7078
GOTERM_CC_DIRECT	GO:0035068~micro-ribonucleoprotein complex	3	0.280374	0.0388543	AGO1, AGO3, TNRC6A	1000	6	18224	9.112	1	0.344733	44.8088
GOTERM_CC_DIRECT	GO:0000932~cytoplasmic mRNA processing body	9	0.841121	0.0633407	ZFP36L1, MEX3A, AGO1, PUM1, CNOT2, AGO3, TNRC6B, TNRC6A, SAMD4A	1000	78	18224	2.10277	1	0.457047	62.5221
GOTERM_BP_DIRECT	GO:0048015~phosphatidylinositol-mediated signaling	10	0.934579	0.152927	EGFR, FGFR1, TNRC6C, AGO1, AGO3, RICTOR, OGT, TNRC6B, TNRC6A, PIK3R1	962	106	16792	1.64673	1	0.943551	95.0993
Annotation Cluster 24	Enrichment Score: 2.122596008508155
Category	Term	Count	%	PValue	Genes	List Total	Pop Hits	Pop Total	Fold Enrichment	Bonferroni	Benjamini	FDR
INTERPRO	IPR000330:SNF2-related	9	0.841121	0.000244108	ATRX, CHD9, CHD7, SHPRH, ERCC6L2, CHD2, CHD4, HELLS, SMARCA4	1011	32	18559	5.16293	0.34578	0.0220847	0.412017
INTERPRO	IPR006576:BRK domain	3	0.280374	0.0383355	CHD9, CHD7, SMARCA4	1011	6	18559	9.17854	1	0.750048	48.3693
SMART	SM00592:BRK	3	0.280374	0.0458172	CHD9, CHD7, SMARCA4	604	6	10057	8.32533	1	0.602112	47.9249
Annotation Cluster 25	Enrichment Score: 2.103622557952485
Category	Term	Count	%	PValue	Genes	List Total	Pop Hits	Pop Total	Fold Enrichment	Bonferroni	Benjamini	FDR
GOTERM_BP_DIRECT	GO:0006338~chromatin remodeling	15	1.40187	0.000352285	RSF1, RBBP4, TTF1, ARID1A, ARID1B, ATRX, CHD7, BPTF, SMARCC1, SMARCC2, BRD4, BAZ2A, RERE, MYSM1, SMARCA4	962	86	16792	3.04453	0.682488	0.0331795	0.638202
GOTERM_BP_DIRECT	GO:0043044~ATP-dependent chromatin remodeling	7	0.654206	0.00150503	ACTB, RBBP4, SMARCC1, SMARCC2, ARID1A, CHD4, SMARCA4	962	23	16792	5.31248	0.992584	0.0934249	2.69973
GOTERM_MF_DIRECT	GO:0031492~nucleosomal DNA binding	9	0.841121	0.00429147	ACTB, HMGN3, RBBP4, HMGN2, SMARCC1, SMARCC2, H2AFY, CHD4, SMARCA4	971	46	16881	3.40145	0.979946	0.126114	6.49201
GOTERM_CC_DIRECT	GO:0071565~nBAF complex	5	0.46729	0.00577233	SMARCC1, SMARCC2, ARID1A, ARID1B, SMARCA4	1000	14	18224	6.50857	0.97956	0.102428	8.31629
GOTERM_CC_DIRECT	GO:0016514~SWI/SNF complex	5	0.46729	0.00753416	SMARCC1, SMARCC2, ARID1A, ARID1B, SMARCA4	1000	15	18224	6.07467	0.993793	0.119313	10.723
BIOCARTA	h_hSWI-SNFpathway:Chromatin Remodeling by hSWI/SNF ATP-dependent Complexes	6	0.560748	0.0097314	ACTB, SMARCC1, SMARCC2, NF1, ARID1A, SMARCA4	135	17	1625	4.24837	0.84704	0.608899	11.4631
GOTERM_BP_DIRECT	GO:0006337~nucleosome disassembly	5	0.46729	0.0139392	SMARCC1, SMARCC2, ARID1A, ARID2, SMARCA4	962	17	16792	5.13391	1	0.435219	22.5138
BIOCARTA	h_vdrPathway:Control of Gene Expression by Vitamin D Receptor	7	0.654206	0.016281	BAZ1B, SMARCC1, TSC2, SMARCC2, ARID1A, NCOR1, SMARCA4	135	26	1625	3.24074	0.957219	0.650257	18.4838
GOTERM_CC_DIRECT	GO:0071564~npBAF complex	4	0.373832	0.0249031	SMARCC1, SMARCC2, ARID1A, SMARCA4	1000	12	18224	6.07467	1	0.273669	31.4927
GOTERM_MF_DIRECT	GO:0000980~RNA polymerase II distal enhancer sequence-specific DNA binding	7	0.654206	0.169043	ACTB, RBBP4, SMARCC1, SFPQ, SMARCC2, CHD4, SMARCA4	971	65	16881	1.87225	1	0.839527	94.4432
Annotation Cluster 26	Enrichment Score: 1.9290295284495749
Category	Term	Count	%	PValue	Genes	List Total	Pop Hits	Pop Total	Fold Enrichment	Bonferroni	Benjamini	FDR
UP_KEYWORDS	DNA damage	31	2.8972	0.00406193	RAD51B, ERCC6L2, PRKDC, MUM1, MLH3, PTTG1, BOD1L1, SETX, RPS3, BRD4, TRIP12, POLK, SHPRH, TAOK1, TP53BP1, SMG1, HERC2, RBBP6, GTF2H2, ATM, RAD50, ATRX, PNKP, EYA4, BAZ1B, RIF1, SFPQ, UBR5, USP47, TDG, REV3L	1047	352	20581	1.73117	0.829064	0.0354083	5.58263
UP_KEYWORDS	DNA repair	26	2.42991	0.00810226	RAD51B, ERCC6L2, PRKDC, MUM1, MLH3, PTTG1, BOD1L1, SETX, RPS3, TRIP12, POLK, SHPRH, TAOK1, TP53BP1, SMG1, HERC2, RAD50, GTF2H2, ATRX, PNKP, EYA4, UBR5, SFPQ, USP47, TDG, REV3L	1047	293	20581	1.74432	0.970716	0.0632917	10.8471
GOTERM_BP_DIRECT	GO:0006281~DNA repair	21	1.96262	0.0496104	POLK, RAD51B, SHPRH, ERCC6L2, ENDOV, TAOK1, SMG1, MUM1, PTTG1, RAD50, ATM, RPS3, BOD1L1, ATRX, EYA4, PNKP, RPAIN, UBR5, NPM1, TDG, TRIP12	962	235	16792	1.55984	1	0.73713	60.3309
Annotation Cluster 27	Enrichment Score: 1.871012849466734
Category	Term	Count	%	PValue	Genes	List Total	Pop Hits	Pop Total	Fold Enrichment	Bonferroni	Benjamini	FDR
UP_KEYWORDS	Hydroxylation	18	1.68224	5.32883e-06	LTBP1, COL3A1, ANKS3, RPL27A, NFKBIA, COL5A2, COL5A1, PKM, COL14A1, RPL8, COL6A3, PPP1R12A, COL6A2, COL1A2, COL6A1, COL1A1, IKBKB, RPS23	1047	95	20581	3.72451	0.00231004	8.89467e-05	0.00752061
UP_SEQ_FEATURE	domain:VWFC	7	0.654206	0.000202827	PXDN, CTGF, COL3A1, FSTL1, COL1A1, COL5A2, CYR61	1037	18	20063	7.52389	0.487256	0.0286248	0.368373
GOTERM_BP_DIRECT	GO:0030199~collagen fibril organization	10	0.934579	0.000283183	COL14A1, PLOD3, COL3A1, NF1, COL1A2, COL1A1, DDR2, SERPINH1, COL5A2, COL5A1	962	39	16792	4.47572	0.602346	0.0293094	0.51332
UP_SEQ_FEATURE	propeptide:C-terminal propeptide	5	0.46729	0.000418552	COL3A1, COL1A2, COL1A1, COL5A2, COL5A1	1037	8	20063	12.092	0.748064	0.0516411	0.758762
GOTERM_BP_DIRECT	GO:0030574~collagen catabolic process	12	1.1215	0.000928023	MRC2, COL3A1, COL6A3, COL1A2, COL6A2, COL6A1, CTSD, COL1A1, MMP14, PHYKPL, COL5A2, COL5A1	962	64	16792	3.27287	0.951347	0.069448	1.67294
GOTERM_MF_DIRECT	GO:0005201~extracellular matrix structural constituent	12	1.1215	0.00141726	LAMA4, FBLN1, PXDN, COL14A1, COL3A1, COL1A2, VCAN, COL1A1, FBN2, LAMB1, COL5A2, COL5A1	971	67	16881	3.11376	0.72451	0.0595443	2.18924
UP_SEQ_FEATURE	domain:Fibrillar collagen NC1	5	0.46729	0.00174142	COL3A1, COL1A2, COL1A1, COL5A2, COL5A1	1037	11	20063	8.79416	0.996784	0.143689	3.12128
INTERPRO	IPR000885:Fibrillar collagen, C-terminal	5	0.46729	0.00211403	COL3A1, COL1A2, COL1A1, COL5A2, COL5A1	1011	11	18559	8.34412	0.974728	0.119116	3.51558
GOTERM_MF_DIRECT	GO:0048407~platelet-derived growth factor binding	5	0.46729	0.00258136	COL3A1, COL1A2, COL6A1, COL1A1, COL5A1	971	11	16881	7.90235	0.904582	0.0971076	3.95379
SMART	SM00038:COLFI	5	0.46729	0.00300809	COL3A1, COL1A2, COL1A1, COL5A2, COL5A1	604	11	10057	7.56848	0.693936	0.0810915	4.10462
UP_KEYWORDS	Ehlers-Danlos syndrome	5	0.46729	0.00440738	COL3A1, COL1A2, COL1A1, COL5A2, COL5A1	1047	14	20581	7.0204	0.852957	0.0361947	6.04379
GOTERM_BP_DIRECT	GO:0071230~cellular response to amino acid stimulus	9	0.841121	0.00479906	EGFR, DNMT3A, CEBPB, COL3A1, COL1A2, COL6A1, PDGFC, COL1A1, COL5A2	962	47	16792	3.3425	1	0.217092	8.37017
KEGG_PATHWAY	hsa04510:Focal adhesion	25	2.33645	0.00550863	CAV1, COL3A1, ARHGAP35, ITGB1, ACTG1, ARHGAP5, ITGB8, COL6A3, COL6A2, PPP1R12A, COL6A1, PDGFC, LAMB1, PIK3R1, FN1, AKT2, ACTB, EGFR, COL5A2, COL5A1, FLNA, LAMA4, CCND2, COL1A2, COL1A1	463	206	6879	1.80309	0.748664	0.128985	6.9246
UP_SEQ_FEATURE	region of interest:Triple-helical region	6	0.560748	0.00561621	COL3A1, COL6A3, COL6A2, COL6A1, COL1A1, COL5A1	1037	23	20063	5.04708	1	0.331809	9.73921
UP_SEQ_FEATURE	domain:VWFA 1	5	0.46729	0.00781121	COL14A1, COL6A3, COL6A2, COL6A1, VIT	1037	16	20063	6.04599	1	0.380108	13.2961
OMIM_DISEASE	158810~Bethlem myopathy 1	3	0.280374	0.00808688	COL6A3, COL6A2, COL6A1	252	3	4740	18.8095	0.962386	0.962386	10.7223
OMIM_DISEASE	254090~Ullrich congenital muscular dystrophy 1	3	0.280374	0.00808688	COL6A3, COL6A2, COL6A1	252	3	4740	18.8095	0.962386	0.962386	10.7223
UP_SEQ_FEATURE	glycosylation site:O-linked (Gal...)	4	0.373832	0.00912099	COL14A1, COL3A1, COL6A3, COL1A1	1037	9	20063	8.59874	1	0.416557	15.3551
UP_SEQ_FEATURE	domain:VWFA 2	5	0.46729	0.00980352	COL14A1, COL6A3, COL6A2, COL6A1, VIT	1037	17	20063	5.69034	1	0.428419	16.4096
UP_KEYWORDS	Collagen	12	1.1215	0.0109403	RPS18, COL14A1, COL3A1, COL6A3, COL1A2, COL6A2, COL6A1, COL1A1, SERPINH1, COL5A2, PCOLCE, COL5A1	1047	98	20581	2.40699	0.991556	0.0803472	14.3806
GOTERM_CC_DIRECT	GO:0005581~collagen trimer	12	1.1215	0.0117689	RPS18, COL14A1, COL3A1, COL6A3, COL1A2, COL6A2, COL6A1, COL1A1, SERPINH1, COL5A2, PCOLCE, COL5A1	1000	92	18224	2.37704	0.999649	0.168907	16.2688
KEGG_PATHWAY	hsa04512:ECM-receptor interaction	13	1.21495	0.0128903	LAMA4, ITGB8, COL3A1, COL6A3, COL1A2, COL6A2, COL6A1, COL1A1, LAMB1, ITGB1, COL5A2, COL5A1, FN1	463	87	6879	2.22008	0.960974	0.255369	15.5108
UP_SEQ_FEATURE	propeptide:N-terminal propeptide	3	0.280374	0.0347768	COL3A1, COL1A2, COL1A1	1037	6	20063	9.67358	1	0.754467	47.4801
GOTERM_MF_DIRECT	GO:0046332~SMAD binding	7	0.654206	0.0351067	COL3A1, COL1A2, FKBP1A, COL5A2, FLNA, PURB, PURA	971	43	16881	2.83014	1	0.452058	42.752
GOTERM_BP_DIRECT	GO:0070208~protein heterotrimerization	4	0.373832	0.0423605	COL1A2, COL6A2, COL6A1, COL1A1	962	14	16792	4.98723	1	0.706389	54.4568
UP_SEQ_FEATURE	short sequence motif:Cell attachment site	10	0.934579	0.0451687	LAMA4, COL14A1, LTBP1, TGFBI, COL6A3, COL6A2, COL6A1, COL1A1, COL5A2, FN1	1037	91	20063	2.12606	1	0.819163	56.8686
UP_SEQ_FEATURE	domain:VWFA 3	3	0.280374	0.0470444	COL6A3, COL6A2, COL6A1	1037	7	20063	8.29164	1	0.821787	58.3843
UP_SEQ_FEATURE	region of interest:Nonhelical region	3	0.280374	0.0606187	COL6A3, COL6A2, COL5A1	1037	8	20063	7.25518	1	0.882936	67.9449
SMART	SM00214:VWC	6	0.560748	0.0680597	PXDN, CTGF, COL3A1, COL1A1, COL5A2, CYR61	604	37	10057	2.70011	1	0.700128	62.4923
KEGG_PATHWAY	hsa04974:Protein digestion and absorption	11	1.02804	0.069559	SLC38A2, COL14A1, COL3A1, COL6A3, COL1A2, COL6A2, COL6A1, ATP1A1, COL1A1, COL5A2, COL5A1	463	88	6879	1.85718	1	0.653629	60.8043
INTERPRO	IPR001007:von Willebrand factor, type C	6	0.560748	0.0701779	PXDN, CTGF, COL3A1, COL1A1, COL5A2, CYR61	1011	41	18559	2.6864	1	0.886998	70.7852
INTERPRO	IPR008160:Collagen triple helix repeat	9	0.841121	0.0773481	COL14A1, COL3A1, COL6A3, COL1A2, COL6A2, COL6A1, COL1A1, COL5A2, COL5A1	1011	82	18559	2.0148	1	0.899106	74.3701
KEGG_PATHWAY	hsa04151:PI3K-Akt signaling pathway	31	2.8972	0.0835508	FGFR1, COL3A1, ITGB1, ITGB8, ATF6B, COL6A3, COL6A2, COL6A1, PDGFC, ANGPT1, PRKAA2, LAMB1, GNG5, PIK3R1, FN1, AKT2, EGFR, HSP90AA1, PKN2, CREB5, RPS6, COL5A2, YWHAE, COL5A1, HSP90B1, LAMA4, CCND2, TSC2, COL1A2, COL1A1, IKBKB	463	345	6879	1.33502	1	0.682732	67.8077
INTERPRO	IPR002035:von Willebrand factor, type A	9	0.841121	0.157884	COL14A1, HMCN1, ITGB8, COL6A3, COL6A2, COL6A1, VIT, ITGB1, GTF2H2	1011	97	18559	1.70323	1	0.978266	94.5305
KEGG_PATHWAY	hsa04611:Platelet activation	13	1.21495	0.162372	ACTB, COL3A1, ARHGAP35, PRKG1, COL5A2, ITGB1, COL5A1, ACTG1, PPP1R12A, COL1A2, COL1A1, PIK3R1, AKT2	463	130	6879	1.48575	1	0.817985	89.9917
GOTERM_BP_DIRECT	GO:0001568~blood vessel development	5	0.46729	0.170632	LAMA4, COL1A2, COL1A1, TCF7L2, COL5A1	962	38	16792	2.29675	1	0.9546	96.6614
KEGG_PATHWAY	hsa05146:Amoebiasis	9	0.841121	0.419648	LAMA4, COL3A1, COL1A2, COL1A1, LAMB1, COL5A2, PIK3R1, COL5A1, FN1	463	106	6879	1.26148	1	0.957722	99.9149
SMART	SM00327:VWA	6	0.560748	0.434891	COL14A1, COL6A3, COL6A2, COL6A1, VIT, GTF2H2	604	72	10057	1.38756	1	0.985478	99.9644
GOTERM_BP_DIRECT	GO:0043588~skin development	3	0.280374	0.587135	COL3A1, COL5A2, COL5A1	962	34	16792	1.54017	1	0.999763	100
GOTERM_BP_DIRECT	GO:0030168~platelet activation	5	0.46729	0.90124	COL3A1, COL1A2, COL1A1, FLNA, PIK3R1	962	115	16792	0.758926	1	1	100
Annotation Cluster 28	Enrichment Score: 1.6848622894740102
Category	Term	Count	%	PValue	Genes	List Total	Pop Hits	Pop Total	Fold Enrichment	Bonferroni	Benjamini	FDR
UP_KEYWORDS	ANK repeat	25	2.33645	0.00434754	ANKRD36C, NFKBIA, ANKLE2, ANKRD36, GABPB1, CTTNBP2, ANKRD12, ANKRD11, PPP1R12A, ANKZF1, HECTD1, EHMT1, ANKS3, YTHDC2, EHMT2, KIDINS220, NOTCH2, ANKRD28, ANKRD49, ACAP3, KRIT1, GLS, ACAP2, ANKFY1, MPHOSPH8	1047	264	20581	1.86147	0.849071	0.0363984	5.96406
INTERPRO	IPR002110:Ankyrin repeat	25	2.33645	0.00646582	ANKRD36C, NFKBIA, ANKLE2, ANKRD36, GABPB1, CTTNBP2, ANKRD12, ANKRD11, PPP1R12A, ANKZF1, HECTD1, EHMT1, ANKS3, YTHDC2, EHMT2, KIDINS220, NOTCH2, ANKRD28, ANKRD49, ACAP3, KRIT1, GLS, ACAP2, ANKFY1, MPHOSPH8	1011	255	18559	1.79971	0.999987	0.282219	10.3897
INTERPRO	IPR020683:Ankyrin repeat-containing domain	25	2.33645	0.00998052	ANKRD36C, NFKBIA, ANKLE2, ANKRD36, GABPB1, CTTNBP2, ANKRD12, ANKRD11, PPP1R12A, ANKZF1, HECTD1, EHMT1, ANKS3, YTHDC2, EHMT2, KIDINS220, NOTCH2, ANKRD28, ANKRD49, ACAP3, KRIT1, GLS, ACAP2, ANKFY1, MPHOSPH8	1011	265	18559	1.7318	1	0.375729	15.6024
UP_SEQ_FEATURE	repeat:ANK 3	20	1.86916	0.0110316	EHMT1, ANKS3, NFKBIA, KIDINS220, EHMT2, ANKRD36, NOTCH2, CTTNBP2, GABPB1, ANKRD28, ANKRD49, ACAP3, ANKRD12, KRIT1, ANKRD11, ACAP2, PPP1R12A, ANKFY1, MPHOSPH8, HECTD1	1037	207	20063	1.86929	1	0.46159	18.2758
UP_SEQ_FEATURE	repeat:ANK 4	17	1.58879	0.015002	EHMT1, ANKS3, NFKBIA, KIDINS220, EHMT2, ANKRD36, NOTCH2, CTTNBP2, GABPB1, ANKRD28, ANKRD49, KRIT1, ANKRD11, PPP1R12A, ANKFY1, MPHOSPH8, HECTD1	1037	170	20063	1.93472	1	0.535031	24.0435
UP_SEQ_FEATURE	repeat:ANK 1	22	2.05607	0.0154751	EHMT1, ANKS3, NFKBIA, YTHDC2, KIDINS220, EHMT2, ANKRD36, NOTCH2, CTTNBP2, GABPB1, ANKRD28, ANKRD49, ACAP3, ANKRD12, KRIT1, ANKRD11, ACAP2, PPP1R12A, ANKZF1, ANKFY1, MPHOSPH8, HECTD1	1037	244	20063	1.74442	1	0.540745	24.7044
UP_SEQ_FEATURE	repeat:ANK 2	22	2.05607	0.0161185	EHMT1, ANKS3, NFKBIA, YTHDC2, KIDINS220, EHMT2, ANKRD36, NOTCH2, CTTNBP2, GABPB1, ANKRD28, ANKRD49, ACAP3, ANKRD12, KRIT1, ANKRD11, ACAP2, PPP1R12A, ANKZF1, ANKFY1, MPHOSPH8, HECTD1	1037	245	20063	1.7373	1	0.550071	25.5946
SMART	SM00248:ANK	23	2.14953	0.0441134	ANKRD36C, EHMT1, ANKS3, NFKBIA, KIDINS220, EHMT2, ANKRD36, NOTCH2, CTTNBP2, GABPB1, ANKRD28, ANKRD49, ACAP3, GLS, ANKRD12, KRIT1, ANKRD11, ACAP2, PPP1R12A, ANKZF1, ANKFY1, MPHOSPH8, HECTD1	604	249	10057	1.53801	1	0.606702	46.6162
UP_SEQ_FEATURE	repeat:ANK 6	9	0.841121	0.139295	NOTCH2, CTTNBP2, ANKRD28, EHMT1, ANKS3, PPP1R12A, KIDINS220, EHMT2, ANKFY1	1037	99	20063	1.75883	1	0.986368	93.4722
UP_SEQ_FEATURE	repeat:ANK 5	11	1.02804	0.199116	NOTCH2, CTTNBP2, GABPB1, ANKRD28, EHMT1, ANKS3, PPP1R12A, NFKBIA, KIDINS220, EHMT2, ANKFY1	1037	142	20063	1.49872	1	0.996233	98.2397
Annotation Cluster 29	Enrichment Score: 1.6813670228449946
Category	Term	Count	%	PValue	Genes	List Total	Pop Hits	Pop Total	Fold Enrichment	Bonferroni	Benjamini	FDR
UP_SEQ_FEATURE	repeat:Spectrin 22	4	0.373832	0.0024409	MACF1, DMD, DST, SPTAN1	1037	6	20063	12.8981	0.99968	0.186453	4.3489
UP_SEQ_FEATURE	repeat:Spectrin 9	5	0.46729	0.00347291	SYNE2, MACF1, DMD, DST, SPTAN1	1037	13	20063	7.44121	0.999989	0.238729	6.13331
UP_SEQ_FEATURE	repeat:Spectrin 8	5	0.46729	0.00347291	SYNE2, MACF1, DMD, DST, SPTAN1	1037	13	20063	7.44121	0.999989	0.238729	6.13331
UP_SEQ_FEATURE	repeat:Spectrin 7	5	0.46729	0.00347291	SYNE2, MACF1, DMD, DST, SPTAN1	1037	13	20063	7.44121	0.999989	0.238729	6.13331
UP_SEQ_FEATURE	repeat:Spectrin 6	5	0.46729	0.00347291	SYNE2, MACF1, DMD, DST, SPTAN1	1037	13	20063	7.44121	0.999989	0.238729	6.13331
UP_SEQ_FEATURE	repeat:Spectrin 21	4	0.373832	0.00410791	MACF1, DMD, DST, SPTAN1	1037	7	20063	11.0555	0.999999	0.270385	7.21559
UP_SEQ_FEATURE	repeat:Spectrin 5	5	0.46729	0.00466522	SYNE2, MACF1, DMD, DST, SPTAN1	1037	14	20063	6.9097	1	0.289786	8.15572
UP_SEQ_FEATURE	repeat:Spectrin 20	4	0.373832	0.00632153	MACF1, DMD, DST, SPTAN1	1037	8	20063	9.67358	1	0.341412	10.8969
UP_SEQ_FEATURE	repeat:Spectrin 19	4	0.373832	0.00632153	MACF1, DMD, DST, SPTAN1	1037	8	20063	9.67358	1	0.341412	10.8969
UP_SEQ_FEATURE	repeat:Spectrin 18	4	0.373832	0.00912099	MACF1, DMD, DST, SPTAN1	1037	9	20063	8.59874	1	0.416557	15.3551
INTERPRO	IPR002017:Spectrin repeat	6	0.560748	0.0100997	SYNE2, MACF1, DMD, KTN1, DST, SPTAN1	1011	25	18559	4.4057	1	0.371411	15.7741
UP_SEQ_FEATURE	domain:Actin-binding	5	0.46729	0.017652	SYNE2, MACF1, DMD, DST, FLNA	1037	20	20063	4.83679	1	0.572567	27.6765
UP_SEQ_FEATURE	repeat:Spectrin 4	5	0.46729	0.0209348	SYNE2, MACF1, DMD, DST, SPTAN1	1037	21	20063	4.60647	1	0.630383	31.9497
UP_SEQ_FEATURE	repeat:Spectrin 10	4	0.373832	0.0212746	MACF1, DMD, DST, SPTAN1	1037	12	20063	6.44905	1	0.631152	32.3781
UP_SEQ_FEATURE	repeat:Spectrin 12	4	0.373832	0.0212746	MACF1, DMD, DST, SPTAN1	1037	12	20063	6.44905	1	0.631152	32.3781
UP_SEQ_FEATURE	repeat:Spectrin 11	4	0.373832	0.0212746	MACF1, DMD, DST, SPTAN1	1037	12	20063	6.44905	1	0.631152	32.3781
UP_SEQ_FEATURE	repeat:Spectrin 13	4	0.373832	0.0212746	MACF1, DMD, DST, SPTAN1	1037	12	20063	6.44905	1	0.631152	32.3781
UP_SEQ_FEATURE	repeat:Spectrin 14	4	0.373832	0.0212746	MACF1, DMD, DST, SPTAN1	1037	12	20063	6.44905	1	0.631152	32.3781
UP_SEQ_FEATURE	repeat:Spectrin 15	4	0.373832	0.0212746	MACF1, DMD, DST, SPTAN1	1037	12	20063	6.44905	1	0.631152	32.3781
UP_SEQ_FEATURE	repeat:Spectrin 16	4	0.373832	0.0212746	MACF1, DMD, DST, SPTAN1	1037	12	20063	6.44905	1	0.631152	32.3781
UP_SEQ_FEATURE	repeat:Spectrin 17	4	0.373832	0.0212746	MACF1, DMD, DST, SPTAN1	1037	12	20063	6.44905	1	0.631152	32.3781
INTERPRO	IPR001715:Calponin homology domain	10	0.934579	0.0218821	SYNE2, MACF1, LIMCH1, DMD, CEP95, LRCH3, GAS2, TAGLN2, DST, FLNA	1011	76	18559	2.4154	1	0.591092	31.2135
UP_SEQ_FEATURE	repeat:Spectrin 23	3	0.280374	0.0239982	MACF1, DST, SPTAN1	1037	5	20063	11.6083	1	0.660724	35.721
UP_SEQ_FEATURE	repeat:Spectrin 3	5	0.46729	0.0245676	SYNE2, MACF1, DMD, DST, SPTAN1	1037	22	20063	4.39708	1	0.664506	36.3999
INTERPRO	IPR001589:Actinin-type, actin-binding, conserved site	5	0.46729	0.0337664	SYNE2, MACF1, DMD, DST, FLNA	1011	23	18559	3.99067	1	0.711697	44.0603
UP_SEQ_FEATURE	repeat:Spectrin 1	5	0.46729	0.0427115	SYNE2, MACF1, DMD, DST, SPTAN1	1037	26	20063	3.72061	1	0.808371	54.8039
UP_SEQ_FEATURE	repeat:Spectrin 2	5	0.46729	0.0427115	SYNE2, MACF1, DMD, DST, SPTAN1	1037	26	20063	3.72061	1	0.808371	54.8039
SMART	SM00033:CH	9	0.841121	0.0427225	SYNE2, MACF1, LIMCH1, DMD, LRCH3, GAS2, TAGLN2, DST, FLNA	604	66	10057	2.27054	1	0.614528	45.5254
UP_SEQ_FEATURE	domain:CH 2	5	0.46729	0.0481634	SYNE2, MACF1, DMD, DST, FLNA	1037	27	20063	3.58281	1	0.822581	59.2645
UP_SEQ_FEATURE	domain:CH 1	5	0.46729	0.0481634	SYNE2, MACF1, DMD, DST, FLNA	1037	27	20063	3.58281	1	0.822581	59.2645
INTERPRO	IPR018159:Spectrin/alpha-actinin	5	0.46729	0.0702445	SYNE2, MACF1, DMD, DST, SPTAN1	1011	29	18559	3.16501	1	0.882991	70.8206
SMART	SM00150:SPEC	5	0.46729	0.092673	SYNE2, MACF1, DMD, DST, SPTAN1	604	29	10057	2.8708	1	0.732313	74.1535
UP_SEQ_FEATURE	domain:CH	4	0.373832	0.370095	LIMCH1, LRCH3, GAS2, TAGLN2	1037	42	20063	1.84259	1	0.999952	99.9777
UP_SEQ_FEATURE	calcium-binding region:2	8	0.747664	0.409049	S100A6, MACF1, FKBP10, DST, CALM2, CALU, RCN2, SPTAN1	1037	118	20063	1.31167	1	0.999984	99.993
GOTERM_CC_DIRECT	GO:0030018~Z disc	8	0.747664	0.470802	SYNE2, DMD, PPP1R12A, FKBP1A, CACNA1C, DST, FBXO22, FLNA	1000	118	18224	1.23553	1	0.940007	99.9928
Annotation Cluster 30	Enrichment Score: 1.6185310158440747
Category	Term	Count	%	PValue	Genes	List Total	Pop Hits	Pop Total	Fold Enrichment	Bonferroni	Benjamini	FDR
GOTERM_BP_DIRECT	GO:0006509~membrane protein ectodomain proteolysis	7	0.654206	0.00116839	NCSTN, HM13, ADAM10, SPPL2B, ADAM17, SPPL2A, RBMX	962	22	16792	5.55396	0.977774	0.0777965	2.10191
GOTERM_BP_DIRECT	GO:0031293~membrane protein intracellular domain proteolysis	6	0.560748	0.00278369	NCSTN, HM13, SPPL2B, ADAM17, SPPL2A, MBTPS1	962	18	16792	5.81843	0.999886	0.144859	4.93914
GOTERM_CC_DIRECT	GO:0071556~integral component of lumenal side of endoplasmic reticulum membrane	7	0.654206	0.00428302	HM13, HLA-A, SPPL2B, SPPL2A, HLA-B, CALR, CANX	1000	29	18224	4.3989	0.94411	0.0836942	6.23472
GOTERM_CC_DIRECT	GO:0030660~Golgi-associated vesicle membrane	5	0.46729	0.0254533	HM13, SPPL2B, GJA1, SPPL2A, ITM2B	1000	21	18224	4.33905	1	0.27447	32.0702
INTERPRO	IPR007369:Peptidase A22B, signal peptide peptidase	3	0.280374	0.0265032	HM13, SPPL2B, SPPL2A	1011	5	18559	11.0142	1	0.653891	36.5076
GOTERM_MF_DIRECT	GO:0042500~aspartic endopeptidase activity, intramembrane cleaving	3	0.280374	0.0293623	HM13, SPPL2B, SPPL2A	971	5	16881	10.4311	1	0.4183	37.195
GOTERM_CC_DIRECT	GO:0071458~integral component of cytoplasmic side of endoplasmic reticulum membrane	3	0.280374	0.0388543	HM13, SPPL2B, SPPL2A	1000	6	18224	9.112	1	0.344733	44.8088
INTERPRO	IPR006639:Peptidase A22, presenilin signal peptide	3	0.280374	0.0517627	HM13, SPPL2B, SPPL2A	1011	7	18559	7.86732	1	0.819254	59.2959
SMART	SM00730:PSN	3	0.280374	0.061641	HM13, SPPL2B, SPPL2A	604	7	10057	7.136	1	0.695977	58.7341
GOTERM_BP_DIRECT	GO:0033619~membrane protein proteolysis	3	0.280374	0.108528	HM13, SPPL2B, SPPL2A	962	10	16792	5.23659	1	0.892096	87.6003
GOTERM_BP_DIRECT	GO:0006465~signal peptide processing	3	0.280374	0.423155	HM13, SPPL2B, SPPL2A	962	25	16792	2.09464	1	0.997968	99.9954
Annotation Cluster 31	Enrichment Score: 1.5543391391965775
Category	Term	Count	%	PValue	Genes	List Total	Pop Hits	Pop Total	Fold Enrichment	Bonferroni	Benjamini	FDR
UP_SEQ_FEATURE	domain:FF 4	3	0.280374	0.0149066	TCERG1, ARHGAP5, ARHGAP35	1037	4	20063	14.5104	1	0.538265	23.9094
UP_SEQ_FEATURE	domain:FF 3	3	0.280374	0.0149066	TCERG1, ARHGAP5, ARHGAP35	1037	4	20063	14.5104	1	0.538265	23.9094
UP_SEQ_FEATURE	domain:FF 2	3	0.280374	0.0347768	TCERG1, ARHGAP5, ARHGAP35	1037	6	20063	9.67358	1	0.754467	47.4801
UP_SEQ_FEATURE	domain:FF 1	3	0.280374	0.0347768	TCERG1, ARHGAP5, ARHGAP35	1037	6	20063	9.67358	1	0.754467	47.4801
INTERPRO	IPR002713:FF domain	3	0.280374	0.0383355	TCERG1, ARHGAP5, ARHGAP35	1011	6	18559	9.17854	1	0.750048	48.3693
SMART	SM00441:FF	3	0.280374	0.0458172	TCERG1, ARHGAP5, ARHGAP35	604	6	10057	8.32533	1	0.602112	47.9249
Annotation Cluster 32	Enrichment Score: 1.452323712465759
Category	Term	Count	%	PValue	Genes	List Total	Pop Hits	Pop Total	Fold Enrichment	Bonferroni	Benjamini	FDR
UP_KEYWORDS	Notch signaling pathway	8	0.747664	0.0140929	NCSTN, NOTCH2, APP, ADAM10, MAML2, ADAM17, SPEN, RBPJ	1047	51	20581	3.08347	0.997887	0.0960495	18.1528
GOTERM_BP_DIRECT	GO:0007219~Notch signaling pathway	14	1.30841	0.0143022	ADAM10, MAML2, SPEN, MDK, NCSTN, NOTCH2, APP, RPS19, ADAM17, UBB, RBPJ, UBA52, EPN1, RPS27A	962	115	16792	2.12499	1	0.439578	23.0305
KEGG_PATHWAY	hsa04330:Notch signaling pathway	6	0.560748	0.218085	NCSTN, NOTCH2, CTBP2, MAML2, ADAM17, RBPJ	463	48	6879	1.85718	1	0.862474	95.907
Annotation Cluster 33	Enrichment Score: 1.3902613924475644
Category	Term	Count	%	PValue	Genes	List Total	Pop Hits	Pop Total	Fold Enrichment	Bonferroni	Benjamini	FDR
UP_SEQ_FEATURE	domain:EGF-like 12; calcium-binding	6	0.560748	0.000706925	NOTCH2, LTBP1, LRP1, LTBP3, LTBP4, FBN2	1037	15	20063	7.73886	0.90258	0.0723681	1.27836
UP_SEQ_FEATURE	domain:EGF-like 9; calcium-binding	6	0.560748	0.000984779	NOTCH2, FBLN1, LTBP1, LTBP3, LTBP4, FBN2	1037	16	20063	7.25518	0.961011	0.0936388	1.77658
UP_SEQ_FEATURE	domain:EGF-like 13; calcium-binding	5	0.46729	0.00174142	NOTCH2, LTBP1, LTBP3, LTBP4, FBN2	1037	11	20063	8.79416	0.996784	0.143689	3.12128
UP_SEQ_FEATURE	domain:EGF-like 7; calcium-binding	7	0.654206	0.00264391	NOTCH2, FBLN1, LTBP1, HMCN1, LTBP3, LTBP4, FBN2	1037	28	20063	4.83679	0.999836	0.195833	4.70243
INTERPRO	IPR026823:Complement Clr-like EGF domain	7	0.654206	0.00343379	FBLN1, LTBP1, HMCN1, LRP1, LTBP3, LTBP4, FBN2	1011	28	18559	4.58927	0.997467	0.17539	5.65101
UP_SEQ_FEATURE	domain:TB 1	4	0.373832	0.00410791	LTBP1, LTBP3, LTBP4, FBN2	1037	7	20063	11.0555	0.999999	0.270385	7.21559
UP_SEQ_FEATURE	domain:TB 2	4	0.373832	0.00410791	LTBP1, LTBP3, LTBP4, FBN2	1037	7	20063	11.0555	0.999999	0.270385	7.21559
UP_SEQ_FEATURE	domain:TB 3	4	0.373832	0.00410791	LTBP1, LTBP3, LTBP4, FBN2	1037	7	20063	11.0555	0.999999	0.270385	7.21559
UP_SEQ_FEATURE	domain:TB 4	4	0.373832	0.00410791	LTBP1, LTBP3, LTBP4, FBN2	1037	7	20063	11.0555	0.999999	0.270385	7.21559
UP_SEQ_FEATURE	domain:EGF-like 11; calcium-binding	5	0.46729	0.00466522	NOTCH2, LTBP1, LTBP3, LTBP4, FBN2	1037	14	20063	6.9097	1	0.289786	8.15572
UP_SEQ_FEATURE	domain:EGF-like 8; calcium-binding	6	0.560748	0.00679761	NOTCH2, FBLN1, LTBP1, LTBP3, LTBP4, FBN2	1037	24	20063	4.83679	1	0.356228	11.6704
UP_SEQ_FEATURE	domain:EGF-like 4; calcium-binding	7	0.654206	0.00725426	FBLN1, LTBP1, HMCN1, FAT3, LTBP3, LTBP4, FBN2	1037	34	20063	3.98324	1	0.369388	12.4064
INTERPRO	IPR017878:TB domain	4	0.373832	0.0105405	LTBP1, LTBP3, LTBP4, FBN2	1011	9	18559	8.1587	1	0.376385	16.4061
UP_KEYWORDS	Growth factor binding	5	0.46729	0.0114591	LTBP1, LTBP3, LTBP4, IGFBP4, CYR61	1047	18	20581	5.46031	0.993275	0.0812845	15.0122
UP_SEQ_FEATURE	domain:EGF-like 5; calcium-binding	7	0.654206	0.0125078	NOTCH2, FBLN1, LTBP1, HMCN1, LTBP3, LTBP4, FBN2	1037	38	20063	3.56395	1	0.48753	20.4668
UP_SEQ_FEATURE	domain:EGF-like 14; calcium-binding	4	0.373832	0.0212746	NOTCH2, LTBP1, LTBP4, FBN2	1037	12	20063	6.44905	1	0.631152	32.3781
UP_SEQ_FEATURE	domain:EGF-like 10; calcium-binding	4	0.373832	0.0266151	LTBP1, LTBP3, LTBP4, FBN2	1037	13	20063	5.95297	1	0.684517	38.7854
INTERPRO	IPR009030:Insulin-like growth factor binding protein, N-terminal	14	1.30841	0.0398367	TMEM67, EGFR, NOTCH2, LAMA4, FBLN1, LTBP1, LRP1, HMCN1, LTBP3, CTGF, LTBP4, FBN2, IGFBP4, CYR61	1011	139	18559	1.84891	1	0.756603	49.7156
UP_SEQ_FEATURE	domain:EGF-like 6; calcium-binding	5	0.46729	0.0427115	FBLN1, LTBP1, HMCN1, LTBP3, LTBP4	1037	26	20063	3.72061	1	0.808371	54.8039
UP_SEQ_FEATURE	domain:EGF-like 18; calcium-binding	3	0.280374	0.0470444	NOTCH2, LTBP1, FBN2	1037	7	20063	8.29164	1	0.821787	58.3843
INTERPRO	IPR018097:EGF-like calcium-binding, conserved site	10	0.934579	0.103442	NOTCH2, FBLN1, LTBP1, HMCN1, LRP1, FAT3, LTBP3, LTBP4, VCAN, FBN2	1011	102	18559	1.79971	1	0.933535	84.2223
UP_SEQ_FEATURE	domain:EGF-like 16; calcium-binding	3	0.280374	0.107576	NOTCH2, LTBP1, FBN2	1037	11	20063	5.2765	1	0.967885	87.39
INTERPRO	IPR000152:EGF-type aspartate/asparagine hydroxylation site	10	0.934579	0.11809	NOTCH2, FBLN1, LTBP1, HMCN1, LRP1, FAT3, LTBP3, LTBP4, VCAN, FBN2	1011	105	18559	1.74829	1	0.947735	88.0585
UP_SEQ_FEATURE	domain:EGF-like 15; calcium-binding	3	0.280374	0.124836	NOTCH2, LTBP1, FBN2	1037	12	20063	4.83679	1	0.97947	91.1611
UP_SEQ_FEATURE	domain:EGF-like 1	10	0.934579	0.167764	NOTCH2, FBLN1, LTBP1, LRP1, FAT3, LTBP3, LTBP4, TENM3, VCAN, FBN2	1037	120	20063	1.61226	1	0.992964	96.4601
UP_SEQ_FEATURE	domain:EGF-like 2; calcium-binding	6	0.560748	0.179065	FBLN1, HMCN1, LRP1, LTBP3, LTBP4, VCAN	1037	58	20063	2.00143	1	0.994472	97.2396
UP_SEQ_FEATURE	domain:EGF-like 3	7	0.654206	0.198381	NOTCH2, LRP1, FAT3, LTBP3, LTBP4, TENM3, FBN2	1037	76	20063	1.78197	1	0.996464	98.2101
GOTERM_MF_DIRECT	GO:0050431~transforming growth factor beta binding	3	0.280374	0.233586	LTBP1, LTBP3, LTBP4	971	16	16881	3.25972	1	0.895653	98.4269
INTERPRO	IPR001881:EGF-like calcium-binding	10	0.934579	0.25492	NOTCH2, FBLN1, LTBP1, HMCN1, LRP1, FAT3, LTBP3, LTBP4, VCAN, FBN2	1011	127	18559	1.44544	1	0.99591	99.3101
SMART	SM00179:EGF_CA	10	0.934579	0.351715	NOTCH2, FBLN1, LTBP1, HMCN1, LRP1, FAT3, LTBP3, LTBP4, VCAN, FBN2	604	127	10057	1.31108	1	0.971237	99.7594
UP_SEQ_FEATURE	domain:EGF-like 6	4	0.373832	0.398489	NOTCH2, LRP1, TENM3, FBN2	1037	44	20063	1.75883	1	0.999978	99.9904
SMART	SM00181:EGF	13	1.21495	0.454409	NOTCH2, LAMA4, FBLN1, LTBP1, HMCN1, LRP1, FAT3, LTBP3, LTBP4, TENM3, VCAN, FBN2, LAMB1	604	188	10057	1.15138	1	0.987839	99.9782
INTERPRO	IPR013032:EGF-like, conserved site	12	1.1215	0.522981	NOTCH2, FBLN1, LTBP1, HMCN1, LRP1, FAT3, ITGB8, LTBP3, LTBP4, TENM3, VCAN, FBN2	1011	199	18559	1.10696	1	0.999976	99.9996
UP_SEQ_FEATURE	domain:EGF-like 3; calcium-binding	3	0.280374	0.590952	FBLN1, LTBP1, HMCN1	1037	38	20063	1.52741	1	1	100
INTERPRO	IPR000742:Epidermal growth factor-like domain	13	1.21495	0.607765	NOTCH2, LAMA4, FBLN1, LTBP1, HMCN1, LRP1, FAT3, LTBP3, LTBP4, TENM3, VCAN, FBN2, LAMB1	1011	231	18559	1.03308	1	0.999996	100
UP_SEQ_FEATURE	domain:EGF-like 2	5	0.46729	0.681081	NOTCH2, LTBP1, FAT3, TENM3, FBN2	1037	89	20063	1.08692	1	1	100
UP_KEYWORDS	EGF-like domain	11	1.02804	0.774304	NOTCH2, FBLN1, LTBP1, HMCN1, LRP1, FAT3, LTBP3, LTBP4, TENM3, VCAN, FBN2	1047	238	20581	0.908522	1	0.97454	100
UP_SEQ_FEATURE	domain:EGF-like 4	3	0.280374	0.815914	NOTCH2, LRP1, TENM3	1037	59	20063	0.983754	1	1	100
Annotation Cluster 34	Enrichment Score: 1.3749046581003654
Category	Term	Count	%	PValue	Genes	List Total	Pop Hits	Pop Total	Fold Enrichment	Bonferroni	Benjamini	FDR
INTERPRO	IPR003108:Growth-arrest-specific protein 2 domain	3	0.280374	0.0383355	MACF1, GAS2, DST	1011	6	18559	9.17854	1	0.750048	48.3693
SMART	SM00033:CH	9	0.841121	0.0427225	SYNE2, MACF1, LIMCH1, DMD, LRCH3, GAS2, TAGLN2, DST, FLNA	604	66	10057	2.27054	1	0.614528	45.5254
SMART	SM00243:GAS2	3	0.280374	0.0458172	MACF1, GAS2, DST	604	6	10057	8.32533	1	0.602112	47.9249
Annotation Cluster 35	Enrichment Score: 1.355211794724489
Category	Term	Count	%	PValue	Genes	List Total	Pop Hits	Pop Total	Fold Enrichment	Bonferroni	Benjamini	FDR
GOTERM_BP_DIRECT	GO:0031054~pre-miRNA processing	5	0.46729	0.0050266	ZCCHC11, DICER1, AGO1, AGO3, ADAR	962	13	16792	6.71358	1	0.223089	8.7501
GOTERM_BP_DIRECT	GO:0035280~miRNA loading onto RISC involved in gene silencing by miRNA	4	0.373832	0.00549558	DICER1, AGO1, AGO3, ADAR	962	7	16792	9.97446	1	0.238041	9.5285
GOTERM_CC_DIRECT	GO:0070578~RISC-loading complex	3	0.280374	0.0524495	DICER1, AGO1, AGO3	1000	7	18224	7.81029	1	0.412813	55.4264
BIOCARTA	h_dicerPathway:Dicer Pathway	3	0.280374	0.0571993	DICER1, AGO1, AGO3	135	5	1625	7.22222	0.999988	0.848142	51.9687
GOTERM_BP_DIRECT	GO:0035196~production of miRNAs involved in gene silencing by miRNA	3	0.280374	0.072793	DICER1, AGO1, AGO3	962	8	16792	6.54574	1	0.816791	74.6738
UP_SEQ_FEATURE	domain:PAZ	3	0.280374	0.0910316	DICER1, AGO1, AGO3	1037	10	20063	5.80415	1	0.946996	82.3862
SMART	SM00949:SM00949	3	0.280374	0.0976485	DICER1, AGO1, AGO3	604	9	10057	5.55022	1	0.739731	76.057
INTERPRO	IPR003100:Argonaute/Dicer protein, PAZ	3	0.280374	0.09962	DICER1, AGO1, AGO3	1011	10	18559	5.50712	1	0.931581	83.0455
GOTERM_CC_DIRECT	GO:0016442~RISC complex	3	0.280374	0.118954	DICER1, AGO1, AGO3	1000	11	18224	4.97018	1	0.624024	85.0351
Annotation Cluster 36	Enrichment Score: 1.3413342111502755
Category	Term	Count	%	PValue	Genes	List Total	Pop Hits	Pop Total	Fold Enrichment	Bonferroni	Benjamini	FDR
GOTERM_BP_DIRECT	GO:0006620~posttranslational protein targeting to membrane	3	0.280374	0.0291399	SEC62, SEC63, SEC61A1	962	5	16792	10.4732	1	0.618214	41.5716
GOTERM_BP_DIRECT	GO:0036498~IRE1-mediated unfolded protein response	8	0.747664	0.0504708	ACADVL, PDIA6, HSPA5, SEC62, SEC63, SEC61A1, SEC61G, SSR1	962	59	16792	2.36682	1	0.737707	60.9784
KEGG_PATHWAY	hsa03060:Protein export	5	0.46729	0.0643382	HSPA5, SEC62, SEC63, SEC61A1, SEC61G	463	23	6879	3.22988	1	0.64622	57.8491
Annotation Cluster 37	Enrichment Score: 1.3028966240297697
Category	Term	Count	%	PValue	Genes	List Total	Pop Hits	Pop Total	Fold Enrichment	Bonferroni	Benjamini	FDR
UP_SEQ_FEATURE	repeat:2-1	6	0.560748	0.0229412	RPL36A, SON, RPL14, CALR, HNRNPH1, CANX	1037	32	20063	3.62759	1	0.648984	34.4426
UP_SEQ_FEATURE	repeat:1-2	6	0.560748	0.0259233	RPL36A, SON, RPL14, CALR, HNRNPH1, CANX	1037	33	20063	3.51766	1	0.679556	37.9891
UP_SEQ_FEATURE	repeat:1-1	6	0.560748	0.0291421	RPL36A, SON, RPL14, CALR, HNRNPH1, CANX	1037	34	20063	3.4142	1	0.703998	41.6131
UP_SEQ_FEATURE	repeat:2-2	6	0.560748	0.0291421	RPL36A, SON, RPL14, CALR, HNRNPH1, CANX	1037	34	20063	3.4142	1	0.703998	41.6131
UP_SEQ_FEATURE	repeat:1-4	4	0.373832	0.0717936	SON, RPL14, CALR, CANX	1037	19	20063	4.07309	1	0.913993	74.2167
UP_SEQ_FEATURE	repeat:1-3	4	0.373832	0.081348	SON, RPL14, CALR, CANX	1037	20	20063	3.86943	1	0.931886	78.6408
UP_SEQ_FEATURE	repeat:2-3	3	0.280374	0.257005	SON, CALR, CANX	1037	19	20063	3.05481	1	0.999166	99.5505
Annotation Cluster 38	Enrichment Score: 1.2883985175157897
Category	Term	Count	%	PValue	Genes	List Total	Pop Hits	Pop Total	Fold Enrichment	Bonferroni	Benjamini	FDR
UP_SEQ_FEATURE	repeat:HEAT 5	7	0.654206	0.00838095	XPO1, SF3B1, EIF4G3, NIPBL, FAM179B, CAND1, KPNB1	1037	35	20063	3.86943	1	0.395833	14.1975
UP_SEQ_FEATURE	repeat:HEAT 4	7	0.654206	0.0222387	XPO1, SF3B1, EIF4G3, NIPBL, FAM179B, CAND1, KPNB1	1037	43	20063	3.14954	1	0.64249	33.5798
UP_SEQ_FEATURE	repeat:HEAT 2	8	0.747664	0.0291255	XPO1, SF3B1, EIF4G3, NIPBL, FAM179B, PRKDC, CAND1, KPNB1	1037	58	20063	2.66857	1	0.708316	41.5949
UP_SEQ_FEATURE	repeat:HEAT 1	8	0.747664	0.0291255	XPO1, SF3B1, EIF4G3, NIPBL, FAM179B, PRKDC, CAND1, KPNB1	1037	58	20063	2.66857	1	0.708316	41.5949
UP_SEQ_FEATURE	repeat:HEAT 3	7	0.654206	0.0428997	XPO1, SF3B1, EIF4G3, NIPBL, FAM179B, CAND1, KPNB1	1037	50	20063	2.7086	1	0.806171	54.9652
UP_SEQ_FEATURE	repeat:HEAT 6	5	0.46729	0.0666988	XPO1, SF3B1, FAM179B, CAND1, KPNB1	1037	30	20063	3.22453	1	0.901673	71.5167
UP_SEQ_FEATURE	repeat:HEAT 8	4	0.373832	0.0717936	XPO1, SF3B1, CAND1, KPNB1	1037	19	20063	4.07309	1	0.913993	74.2167
UP_SEQ_FEATURE	repeat:HEAT 7	4	0.373832	0.124424	XPO1, SF3B1, CAND1, KPNB1	1037	24	20063	3.22453	1	0.979893	91.085
UP_SEQ_FEATURE	repeat:HEAT 10	3	0.280374	0.179785	XPO1, SF3B1, CAND1	1037	15	20063	3.86943	1	0.99437	97.2833
UP_SEQ_FEATURE	repeat:HEAT 9	3	0.280374	0.179785	XPO1, SF3B1, CAND1	1037	15	20063	3.86943	1	0.99437	97.2833
Annotation Cluster 39	Enrichment Score: 1.2568383910474556
Category	Term	Count	%	PValue	Genes	List Total	Pop Hits	Pop Total	Fold Enrichment	Bonferroni	Benjamini	FDR
GOTERM_BP_DIRECT	GO:0006122~mitochondrial electron transport, ubiquinol to cytochrome c	6	0.560748	0.00112619	UQCR11, UQCRH, CYCS, UQCRQ, PMPCB, UQCRB	962	15	16792	6.98212	0.974496	0.0766616	2.02672
GOTERM_MF_DIRECT	GO:0008121~ubiquinol-cytochrome-c reductase activity	4	0.373832	0.0167394	UQCR11, UQCRH, UQCRQ, UQCRB	971	10	16881	6.95407	1	0.300128	23.1621
GOTERM_CC_DIRECT	GO:0005750~mitochondrial respiratory chain complex III	4	0.373832	0.0310816	UQCRH, UQCRQ, PMPCB, UQCRB	1000	13	18224	5.60738	1	0.302067	37.7222
UP_KEYWORDS	Respiratory chain	7	0.654206	0.0999029	NDUFB4, UQCR11, UQCRH, CYCS, NDUFA13, UQCRQ, UQCRB	1047	63	20581	2.18412	1	0.401456	77.3609
GOTERM_BP_DIRECT	GO:0009060~aerobic respiration	4	0.373832	0.292169	UQCRH, PMPCB, METTL17, UQCRB	962	33	16792	2.11579	1	0.990431	99.8125
GOTERM_CC_DIRECT	GO:0070469~respiratory chain	3	0.280374	0.300565	UQCR11, CYCS, UQCRQ	1000	20	18224	2.7336	1	0.871681	99.5307
UP_KEYWORDS	Electron transport	8	0.747664	0.309832	NDUFB4, UQCR11, UQCRH, CYCS, TXN, NDUFA13, UQCRQ, UQCRB	1047	108	20581	1.45608	1	0.753266	99.4666
Annotation Cluster 40	Enrichment Score: 1.2000343087922765
Category	Term	Count	%	PValue	Genes	List Total	Pop Hits	Pop Total	Fold Enrichment	Bonferroni	Benjamini	FDR
UP_KEYWORDS	Protein biosynthesis	16	1.49533	0.010659	EEF1A1, EEF1B2, SECISBP2, EIF5B, EIF5A, LARP1, IARS, EIF4G3, EIF3E, LARS, AGO1, TCEB2, EIF3K, EIF1, AGO3, MARS	1047	152	20581	2.06917	0.990447	0.0796958	14.0363
UP_KEYWORDS	Initiation factor	7	0.654206	0.073235	EIF4G3, EIF3E, AGO1, EIF3K, EIF5B, AGO3, EIF1	1047	58	20581	2.37241	1	0.341521	65.816
GOTERM_MF_DIRECT	GO:0003743~translation initiation factor activity	7	0.654206	0.136736	EIF4G3, EIF3E, AGO1, EIF3K, EIF5B, AGO3, EIF1	971	61	16881	1.99502	1	0.796305	89.9224
GOTERM_BP_DIRECT	GO:0006446~regulation of translational initiation	5	0.46729	0.148437	EIF4G3, EIF3E, EIF3K, EIF5B, EIF1	962	36	16792	2.42435	1	0.939963	94.6052
Annotation Cluster 41	Enrichment Score: 1.1995738124151127
Category	Term	Count	%	PValue	Genes	List Total	Pop Hits	Pop Total	Fold Enrichment	Bonferroni	Benjamini	FDR
GOTERM_BP_DIRECT	GO:0000302~response to reactive oxygen species	9	0.841121	0.00140603	P4HB, TRA2B, CYCS, TXN, PRDX5, GPX8, SOD1, PRDX1, SOD2	962	39	16792	4.02815	0.989758	0.0892576	2.52428
GOTERM_BP_DIRECT	GO:0019430~removal of superoxide radicals	3	0.280374	0.147783	SOD1, PRDX1, SOD2	962	12	16792	4.36383	1	0.940065	94.5295
UP_KEYWORDS	Antioxidant	3	0.280374	0.157007	PRDX5, SOD1, PRDX1	1047	14	20581	4.21224	1	0.527039	91.0234
KEGG_PATHWAY	hsa04146:Peroxisome	7	0.654206	0.487715	GSTK1, PEX26, PRDX5, ABCD4, SOD1, PRDX1, SOD2	463	83	6879	1.25304	1	0.957364	99.9832
Annotation Cluster 42	Enrichment Score: 1.1873454195118096
Category	Term	Count	%	PValue	Genes	List Total	Pop Hits	Pop Total	Fold Enrichment	Bonferroni	Benjamini	FDR
GOTERM_BP_DIRECT	GO:0016575~histone deacetylation	8	0.747664	0.0149194	TBL1XR1, RBBP4, ARID4B, MTA1, HDAC9, RBBP7, BAZ2A, CHD4	962	46	16792	3.0357	1	0.445496	23.9015
GOTERM_MF_DIRECT	GO:0004407~histone deacetylase activity	6	0.560748	0.0709149	RBBP4, ARID4B, MTA1, HDAC9, RBBP7, CHD4	971	39	16881	2.67464	1	0.636891	68.2732
GOTERM_CC_DIRECT	GO:0016581~NuRD complex	3	0.280374	0.259105	RBBP4, RBBP7, CHD4	1000	18	18224	3.03733	1	0.839922	98.8868
Annotation Cluster 43	Enrichment Score: 1.1765823502475898
Category	Term	Count	%	PValue	Genes	List Total	Pop Hits	Pop Total	Fold Enrichment	Bonferroni	Benjamini	FDR
UP_KEYWORDS	Viral nucleoprotein	5	0.46729	0.0514493	HNRNPA3, SNRNP200, SNRNP70, HNRNPR, AHNAK	1047	28	20581	3.5102	1	0.263357	52.5493
GOTERM_CC_DIRECT	GO:0019013~viral nucleocapsid	5	0.46729	0.0645314	HNRNPA3, SNRNP200, SNRNP70, HNRNPR, AHNAK	1000	28	18224	3.25429	1	0.45886	63.2303
UP_KEYWORDS	Virion	6	0.560748	0.0889411	HNRNPA3, SNRNP200, ERV3-1, SNRNP70, HNRNPR, AHNAK	1047	47	20581	2.50942	1	0.375042	73.1431
Annotation Cluster 44	Enrichment Score: 1.174296943292392
Category	Term	Count	%	PValue	Genes	List Total	Pop Hits	Pop Total	Fold Enrichment	Bonferroni	Benjamini	FDR
UP_SEQ_FEATURE	domain:G-patch	5	0.46729	0.0285573	SON, SUGP2, RBM5, RBM6, GPATCH8	1037	23	20063	4.2059	1	0.705708	40.9699
INTERPRO	IPR000467:G-patch domain	5	0.46729	0.0937939	SON, SUGP2, RBM5, RBM6, GPATCH8	1011	32	18559	2.86829	1	0.922294	81.0916
SMART	SM00443:G_patch	5	0.46729	0.112	SON, SUGP2, RBM5, RBM6, GPATCH8	604	31	10057	2.68559	1	0.756977	80.8437
Annotation Cluster 45	Enrichment Score: 1.1655122978251053
Category	Term	Count	%	PValue	Genes	List Total	Pop Hits	Pop Total	Fold Enrichment	Bonferroni	Benjamini	FDR
INTERPRO	IPR001876:Zinc finger, RanBP2-type	5	0.46729	0.0443018	FUS, ZRANB2, RBM5, MDM4, EWSR1	1011	25	18559	3.67141	1	0.786518	53.5271
UP_SEQ_FEATURE	zinc finger region:RanBP2-type	4	0.373832	0.0627804	FUS, RBM5, MDM4, EWSR1	1037	18	20063	4.29937	1	0.889323	69.2607
SMART	SM00547:ZnF_RBZ	4	0.373832	0.114609	FUS, ZRANB2, RBM5, EWSR1	604	20	10057	3.33013	1	0.755124	81.612
Annotation Cluster 46	Enrichment Score: 1.1456233148419555
Category	Term	Count	%	PValue	Genes	List Total	Pop Hits	Pop Total	Fold Enrichment	Bonferroni	Benjamini	FDR
UP_SEQ_FEATURE	domain:HECT	5	0.46729	0.0539809	UBR5, HERC4, HERC2, TRIP12, HECTD1	1037	28	20063	3.45485	1	0.853912	63.5638
GOTERM_BP_DIRECT	GO:0042787~protein ubiquitination involved in ubiquitin-dependent protein catabolic process	15	1.40187	0.0558185	TAF1, ANAPC5, UBR4, HERC4, PTTG1, HERC2, RBBP6, OS9, RNF115, UBR5, UBB, UBA52, TRIP12, RPS27A, HECTD1	962	153	16792	1.7113	1	0.754908	64.7844
INTERPRO	IPR000569:HECT	5	0.46729	0.0631593	UBR5, HERC4, HERC2, TRIP12, HECTD1	1011	28	18559	3.27805	1	0.867984	66.8234
UP_SEQ_FEATURE	active site:Glycyl thioester intermediate	8	0.747664	0.0731668	UBR5, UBE2G2, HERC4, BIRC6, HERC2, UBE2H, TRIP12, HECTD1	1037	71	20063	2.17996	1	0.916031	74.9019
SMART	SM00119:HECTc	5	0.46729	0.0836605	UBR5, HERC4, HERC2, TRIP12, HECTD1	604	28	10057	2.97333	1	0.719644	70.3435
INTERPRO	IPR009091:Regulator of chromosome condensation 1/beta-lactamase-inhibitor protein II	4	0.373832	0.114807	UBR5, HERC4, HERC2, MYCBP2	1011	22	18559	3.33765	1	0.947332	87.2842
Annotation Cluster 47	Enrichment Score: 1.1043299444555603
Category	Term	Count	%	PValue	Genes	List Total	Pop Hits	Pop Total	Fold Enrichment	Bonferroni	Benjamini	FDR
GOTERM_BP_DIRECT	GO:0061621~canonical glycolysis	7	0.654206	0.00296353	ALDOA, PKM, TPI1, PGAM1, PGK1, GAPDH, ENO1	962	26	16792	4.6995	0.999936	0.148759	5.25016
UP_KEYWORDS	Glycolysis	7	0.654206	0.00419093	ALDOA, PKM, TPI1, PGAM1, PGK1, GAPDH, ENO1	1047	31	20581	4.4387	0.838409	0.0357973	5.75508
BIOCARTA	h_glycolysisPathway:Glycolysis Pathway	5	0.46729	0.00627345	TPI1, PGAM1, PGK1, GAPDH, ENO1	135	10	1625	6.01852	0.701294	0.701294	7.53605
GOTERM_BP_DIRECT	GO:0006096~glycolytic process	7	0.654206	0.0117332	ALDOA, LDHA, TPI1, PGAM1, PGK1, GAPDH, ENO1	962	34	16792	3.59374	1	0.400937	19.3025
GOTERM_BP_DIRECT	GO:0006094~gluconeogenesis	6	0.560748	0.105	ALDOA, TPI1, PGAM1, PGK1, GAPDH, ENO1	962	44	16792	2.38027	1	0.889461	86.6776
KEGG_PATHWAY	hsa00010:Glycolysis / Gluconeogenesis	8	0.747664	0.161112	ALDOA, PKM, LDHA, TPI1, PGAM1, PGK1, GAPDH, ENO1	463	67	6879	1.77402	1	0.827401	89.7944
KEGG_PATHWAY	hsa01230:Biosynthesis of amino acids	8	0.747664	0.207403	ALDOA, PKM, TPI1, PHGDH, PGAM1, PGK1, GAPDH, ENO1	463	72	6879	1.65083	1	0.855864	95.118
KEGG_PATHWAY	hsa01200:Carbon metabolism	9	0.841121	0.492012	ALDOA, PKM, TPI1, PHGDH, PGAM1, HIBCH, PGK1, GAPDH, ENO1	463	113	6879	1.18334	1	0.956528	99.9849
UP_KEYWORDS	Hereditary hemolytic anemia	3	0.280374	0.505333	ALDOA, TPI1, PGK1	1047	33	20581	1.78701	1	0.8819	99.9952
UP_SEQ_FEATURE	binding site:Substrate	12	1.1215	0.91309	ALDOA, PKM, RDH11, LDHA, TPI1, AKR1B1, SAT2, AHCYL1, HIBCH, PGK1, ENO1, MIF	1037	301	20063	0.771315	1	1	100
KEGG_PATHWAY	hsa01130:Biosynthesis of antibiotics	9	0.841121	0.977534	ALDOA, PKM, LDHA, TPI1, PHGDH, PGAM1, PGK1, GAPDH, ENO1	463	212	6879	0.630741	1	0.998748	100
Annotation Cluster 48	Enrichment Score: 1.057719265453148
Category	Term	Count	%	PValue	Genes	List Total	Pop Hits	Pop Total	Fold Enrichment	Bonferroni	Benjamini	FDR
GOTERM_BP_DIRECT	GO:0010880~regulation of release of sequestered calcium ion into cytosol by sarcoplasmic reticulum	4	0.373832	0.0802749	CHD7, DMD, ASPH, CALM2	962	18	16792	3.87896	1	0.839364	78.1409
GOTERM_BP_DIRECT	GO:0060314~regulation of ryanodine-sensitive calcium-release channel activity	4	0.373832	0.091439	DMD, FKBP1A, ASPH, CALM2	962	19	16792	3.6748	1	0.866596	82.4912
GOTERM_BP_DIRECT	GO:0010881~regulation of cardiac muscle contraction by regulation of the release of sequestered calcium ion	4	0.373832	0.091439	DMD, ASPH, CACNA1C, CALM2	962	19	16792	3.6748	1	0.866596	82.4912
Annotation Cluster 49	Enrichment Score: 1.0560236847273101
Category	Term	Count	%	PValue	Genes	List Total	Pop Hits	Pop Total	Fold Enrichment	Bonferroni	Benjamini	FDR
UP_SEQ_FEATURE	domain:FATC	3	0.280374	0.0347768	SMG1, PRKDC, ATM	1037	6	20063	9.67358	1	0.754467	47.4801
UP_SEQ_FEATURE	domain:FAT	3	0.280374	0.0347768	SMG1, PRKDC, ATM	1037	6	20063	9.67358	1	0.754467	47.4801
INTERPRO	IPR003152:PIK-related kinase, FATC	3	0.280374	0.0383355	SMG1, PRKDC, ATM	1011	6	18559	9.17854	1	0.750048	48.3693
INTERPRO	IPR014009:PIK-related kinase	3	0.280374	0.0383355	SMG1, PRKDC, ATM	1011	6	18559	9.17854	1	0.750048	48.3693
SMART	SM01343:SM01343	3	0.280374	0.0458172	SMG1, PRKDC, ATM	604	6	10057	8.32533	1	0.602112	47.9249
INTERPRO	IPR018936:Phosphatidylinositol 3/4-kinase, conserved site	3	0.280374	0.215352	SMG1, PRKDC, ATM	1011	16	18559	3.44195	1	0.991686	98.3449
UP_SEQ_FEATURE	domain:PI3K/PI4K	3	0.280374	0.237509	SMG1, PRKDC, ATM	1037	18	20063	3.22453	1	0.998592	99.2798
SMART	SM00146:PI3Kc	3	0.280374	0.271432	SMG1, PRKDC, ATM	604	17	10057	2.93835	1	0.940897	98.7792
INTERPRO	IPR000403:Phosphatidylinositol 3-/4-kinase, catalytic domain	3	0.280374	0.277005	SMG1, PRKDC, ATM	1011	19	18559	2.89849	1	0.997183	99.5852
Annotation Cluster 50	Enrichment Score: 1.049823680106681
Category	Term	Count	%	PValue	Genes	List Total	Pop Hits	Pop Total	Fold Enrichment	Bonferroni	Benjamini	FDR
UP_SEQ_FEATURE	domain:ADF-H	3	0.280374	0.0606187	DBNL, CFL1, DSTN	1037	8	20063	7.25518	1	0.882936	67.9449
INTERPRO	IPR002108:Actin-binding, cofilin/tropomyosin type	3	0.280374	0.09962	DBNL, CFL1, DSTN	1011	10	18559	5.50712	1	0.931581	83.0455
SMART	SM00102:ADF	3	0.280374	0.117375	DBNL, CFL1, DSTN	604	10	10057	4.9952	1	0.753882	82.3954
Annotation Cluster 51	Enrichment Score: 1.0094587957921677
Category	Term	Count	%	PValue	Genes	List Total	Pop Hits	Pop Total	Fold Enrichment	Bonferroni	Benjamini	FDR
UP_KEYWORDS	Amyloidosis	5	0.46729	0.0514493	APP, ADAM10, TGFBI, ITM2B, B2M	1047	28	20581	3.5102	1	0.263357	52.5493
UP_KEYWORDS	Amyloid	4	0.373832	0.131627	APP, TGFBI, ITM2B, B2M	1047	25	20581	3.14514	1	0.482438	86.3565
GOTERM_BP_DIRECT	GO:0044267~cellular protein metabolic process	11	1.02804	0.138325	APP, CKAP4, TGFBI, TTF1, UBB, GGA1, ITM2B, UBA52, RPS27A, IGFBP4, B2M	962	118	16792	1.62719	1	0.93029	93.3145
Annotation Cluster 52	Enrichment Score: 1.0055223934496567
Category	Term	Count	%	PValue	Genes	List Total	Pop Hits	Pop Total	Fold Enrichment	Bonferroni	Benjamini	FDR
UP_SEQ_FEATURE	zinc finger region:GATA-type	3	0.280374	0.0347768	TRPS1, GATAD1, RERE	1037	6	20063	9.67358	1	0.754467	47.4801
INTERPRO	IPR000679:Zinc finger, GATA-type	4	0.373832	0.0447747	TRPS1, MTA1, GATAD1, RERE	1011	15	18559	4.89522	1	0.783691	53.9145
INTERPRO	IPR013088:Zinc finger, NHR/GATA-type	4	0.373832	0.618174	TRPS1, GATAD1, NR2F2, RERE	1011	58	18559	1.266	1	0.999997	100
Annotation Cluster 53	Enrichment Score: 0.9887122126925612
Category	Term	Count	%	PValue	Genes	List Total	Pop Hits	Pop Total	Fold Enrichment	Bonferroni	Benjamini	FDR
UP_KEYWORDS	Ubl conjugation pathway	46	4.29907	0.0430013	USP8, LTN1, ATG12, PPIL2, UBE2G2, ZNF451, RNF216, RNF213, TTC3, MYCBP2, SENP6, SUMO2, USP34, FBXO22, USP33, MYSM1, TRIP12, AUP1, HECTD1, TBL1XR1, SHPRH, ANAPC5, UBR4, HERC4, BIRC6, HERC2, UBE2H, RBBP6, UBL5, WSB1, TRIM38, DCAF5, TRIM56, ATXN3, RNF115, TRIM33, UBR5, USP47, TCEB2, COMMD2, CAND1, PIAS2, PIAS1, USP48, USP22, COMMD6	1047	680	20581	1.32975	1	0.241536	46.2237
GOTERM_MF_DIRECT	GO:0016874~ligase activity	22	2.05607	0.0973094	LTN1, SHPRH, PPIL2, ZNF451, UBR4, HERC4, BIRC6, RNF216, HERC2, RBBP6, RNF213, TTC3, MYCBP2, TRIM38, TRIM56, RNF115, TRIM33, UBR5, PIAS2, PIAS1, TRIP12, HECTD1	971	270	16881	1.41657	1	0.706085	79.7664
GOTERM_MF_DIRECT	GO:0004842~ubiquitin-protein transferase activity	23	2.14953	0.258361	SHPRH, PPIL2, UBE2G2, UBR4, HERC4, BIRC6, RNF216, HERC2, UBE2H, RBBP6, RNF213, TTC3, WSB1, TRIM56, RNF115, TRIM33, UBR5, NAIP, KLHL24, FBXO22, TRIP12, MPHOSPH8, HECTD1	971	329	16881	1.21538	1	0.911596	99.058
Annotation Cluster 54	Enrichment Score: 0.971031400935522
Category	Term	Count	%	PValue	Genes	List Total	Pop Hits	Pop Total	Fold Enrichment	Bonferroni	Benjamini	FDR
UP_SEQ_FEATURE	domain:BAH	3	0.280374	0.0753323	ASH1L, MTA1, RERE	1037	9	20063	6.44905	1	0.918241	75.9476
INTERPRO	IPR001025:Bromo adjacent homology (BAH) domain	3	0.280374	0.117517	ASH1L, MTA1, RERE	1011	11	18559	5.00647	1	0.949024	87.9267
SMART	SM00439:BAH	3	0.280374	0.137983	ASH1L, MTA1, RERE	604	11	10057	4.54109	1	0.80228	87.3268
Annotation Cluster 55	Enrichment Score: 0.9162726268641459
Category	Term	Count	%	PValue	Genes	List Total	Pop Hits	Pop Total	Fold Enrichment	Bonferroni	Benjamini	FDR
GOTERM_MF_DIRECT	GO:0004601~peroxidase activity	5	0.46729	0.0346209	PXDN, GPX4, PRDX5, GPX8, PRDX1	971	22	16881	3.95117	1	0.453545	42.3005
UP_KEYWORDS	Peroxidase	5	0.46729	0.0357962	PXDN, GPX4, PRDX5, GPX8, PRDX1	1047	25	20581	3.93142	1	0.207572	40.2187
GOTERM_BP_DIRECT	GO:0006979~response to oxidative stress	10	0.934579	0.178275	EGFR, PNKP, NDUFB4, APP, PXDN, GPX4, PRDX5, GPX8, MMP14, RPS3	962	110	16792	1.58685	1	0.95975	97.1784
GOTERM_BP_DIRECT	GO:0042744~hydrogen peroxide catabolic process	3	0.280374	0.318763	PXDN, PRDX5, PRDX1	962	20	16792	2.6183	1	0.993391	99.9065
GOTERM_BP_DIRECT	GO:0098869~cellular oxidant detoxification	6	0.560748	0.372307	PXDN, GPX4, GSTK1, TXN, PRDX5, GPX8	962	70	16792	1.49617	1	0.996361	99.9789
Annotation Cluster 56	Enrichment Score: 0.9125551073397615
Category	Term	Count	%	PValue	Genes	List Total	Pop Hits	Pop Total	Fold Enrichment	Bonferroni	Benjamini	FDR
GOTERM_BP_DIRECT	GO:0042059~negative regulation of epidermal growth factor receptor signaling pathway	10	0.934579	0.000146851	EGFR, SPRY1, AP2B1, RNF115, AP2S1, HGS, UBB, UBA52, RPS27A, EPN1	962	36	16792	4.84869	0.380091	0.016933	0.266506
INTERPRO	IPR000626:Ubiquitin	10	0.934579	0.00436463	NFATC2IP, SUMO2, TCEB2, FAU, USP48, UBB, IKBKB, UBA52, RPS27A, UBL5	1011	59	18559	3.11137	0.999501	0.211461	7.13031
GOTERM_BP_DIRECT	GO:0051403~stress-activated MAPK cascade	6	0.560748	0.00573156	RBM4, UBB, IKBKB, MAP2K7, UBA52, RPS27A	962	21	16792	4.98723	1	0.240603	9.91779
GOTERM_BP_DIRECT	GO:0075733~intracellular transport of virus	9	0.841121	0.00795004	XPO1, NUP160, RAN, NUP107, UBB, TPR, KPNB1, UBA52, RPS27A	962	51	16792	3.08035	1	0.299535	13.501
UP_SEQ_FEATURE	zinc finger region:C4-type	11	1.02804	0.0111484	RPS27, ACAP3, ACAP2, RPL37A, RPL37, UBB, PCLO, UBA52, RPS27A, GTF2H2, REV3L	1037	84	20063	2.53356	1	0.45952	18.4512
INTERPRO	IPR019954:Ubiquitin conserved site	4	0.373832	0.0190836	FAU, UBB, UBA52, RPS27A	1011	11	18559	6.6753	1	0.549469	27.8084
GOTERM_BP_DIRECT	GO:0038128~ERBB2 signaling pathway	7	0.654206	0.01986	EGFR, HSP90AA1, USP8, UBB, UBA52, RPS27A, PIK3R1	962	38	16792	3.21545	1	0.516024	30.546
GOTERM_BP_DIRECT	GO:0042276~error-prone translesion synthesis	5	0.46729	0.0207331	POLK, UBB, UBA52, RPS27A, REV3L	962	19	16792	4.5935	1	0.523593	31.6617
GOTERM_CC_DIRECT	GO:0030666~endocytic vesicle membrane	9	0.841121	0.0272845	CAV1, AP2B1, LRP1, CACNG8, AP2S1, WLS, UBB, UBA52, RPS27A	1000	66	18224	2.48509	1	0.282487	33.9597
INTERPRO	IPR019956:Ubiquitin subgroup	4	0.373832	0.0305037	FAU, UBB, UBA52, RPS27A	1011	13	18559	5.64833	1	0.689774	40.7786
GOTERM_BP_DIRECT	GO:0032479~regulation of type I interferon production	4	0.373832	0.0347237	TRIM56, UBB, UBA52, RPS27A	962	13	16792	5.37086	1	0.652047	47.3854
SMART	SM00213:UBQ	7	0.654206	0.0417411	NFATC2IP, SUMO2, TCEB2, FAU, UBB, UBA52, RPS27A	604	43	10057	2.71057	1	0.626812	44.7432
UP_SEQ_FEATURE	compositionally biased region:Lys-rich (highly basic)	3	0.280374	0.0470444	UBB, UBA52, RPS27A	1037	7	20063	8.29164	1	0.821787	58.3843
UP_SEQ_FEATURE	chain:40S ribosomal protein S27a	3	0.280374	0.0470444	UBB, UBA52, RPS27A	1037	7	20063	8.29164	1	0.821787	58.3843
UP_SEQ_FEATURE	chain:Ubiquitin	3	0.280374	0.0470444	UBB, UBA52, RPS27A	1037	7	20063	8.29164	1	0.821787	58.3843
UP_SEQ_FEATURE	site:Essential for function	3	0.280374	0.0470444	UBB, UBA52, RPS27A	1037	7	20063	8.29164	1	0.821787	58.3843
GOTERM_BP_DIRECT	GO:0042769~DNA damage response, detection of DNA damage	6	0.560748	0.0525851	PNKP, SOX4, UBB, UBA52, RPS27A, RPS3	962	36	16792	2.90922	1	0.741522	62.5274
GOTERM_BP_DIRECT	GO:0005978~glycogen biosynthetic process	5	0.46729	0.058421	UBB, UBA52, RPS27A, AGL, AKT2	962	26	16792	3.35679	1	0.765866	66.5071
UP_SEQ_FEATURE	binding site:Activating enzyme	3	0.280374	0.0606187	UBB, UBA52, RPS27A	1037	8	20063	7.25518	1	0.882936	67.9449
UP_SEQ_FEATURE	cross-link:Glycyl lysine isopeptide (Gly-Lys) (interchain with K-? in acceptor proteins)	4	0.373832	0.0627804	SUMO2, UBB, UBA52, RPS27A	1037	18	20063	4.29937	1	0.889323	69.2607
GOTERM_BP_DIRECT	GO:0030512~negative regulation of transforming growth factor beta receptor signaling pathway	8	0.747664	0.0722418	GLG1, CAV1, ZNF451, ADAM17, HSPA5, UBB, UBA52, RPS27A	962	64	16792	2.18191	1	0.818651	74.3988
GOTERM_BP_DIRECT	GO:0061418~regulation of transcription from RNA polymerase II promoter in response to hypoxia	5	0.46729	0.0732206	EGR1, TCEB2, UBB, UBA52, RPS27A	962	28	16792	3.11702	1	0.816546	74.8852
GOTERM_BP_DIRECT	GO:0016197~endosomal transport	8	0.747664	0.0822912	CHMP2A, ZFYVE16, KIAA1033, HGS, UBB, AP5M1, UBA52, RPS27A	962	66	16792	2.11579	1	0.843033	78.9954
GOTERM_BP_DIRECT	GO:0032480~negative regulation of type I interferon production	5	0.46729	0.0897268	PCBP2, RNF216, UBB, UBA52, RPS27A	962	30	16792	2.90922	1	0.86652	81.8819
GOTERM_BP_DIRECT	GO:0070911~global genome nucleotide-excision repair	5	0.46729	0.107845	SUMO2, UBB, UBA52, RPS27A, GTF2H2	962	32	16792	2.72739	1	0.891923	87.4266
GOTERM_BP_DIRECT	GO:0000717~nucleotide-excision repair, DNA duplex unwinding	4	0.373832	0.128374	UBB, UBA52, RPS27A, GTF2H2	962	22	16792	3.17369	1	0.923542	91.7635
GOTERM_BP_DIRECT	GO:0000715~nucleotide-excision repair, DNA damage recognition	4	0.373832	0.141696	COPS6, UBB, UBA52, RPS27A	962	23	16792	3.0357	1	0.934034	93.7741
GOTERM_BP_DIRECT	GO:0019068~virion assembly	3	0.280374	0.147783	UBB, UBA52, RPS27A	962	12	16792	4.36383	1	0.940065	94.5295
GOTERM_BP_DIRECT	GO:0010939~regulation of necrotic cell death	3	0.280374	0.147783	UBB, UBA52, RPS27A	962	12	16792	4.36383	1	0.940065	94.5295
GOTERM_BP_DIRECT	GO:0019985~translesion synthesis	5	0.46729	0.148437	POLK, UBB, UBA52, RPS27A, REV3L	962	36	16792	2.42435	1	0.939963	94.6052
GOTERM_BP_DIRECT	GO:0006297~nucleotide-excision repair, DNA gap filling	4	0.373832	0.155453	POLK, UBB, UBA52, RPS27A	962	24	16792	2.90922	1	0.945561	95.3582
GOTERM_BP_DIRECT	GO:0007179~transforming growth factor beta receptor signaling pathway	9	0.841121	0.15595	CCL2, COL3A1, SMAD5, COL1A2, FKBP1A, UBB, ITGB1, UBA52, RPS27A	962	92	16792	1.70758	1	0.945276	95.4076
GOTERM_BP_DIRECT	GO:0006296~nucleotide-excision repair, DNA incision, 5'-to lesion	5	0.46729	0.159392	POLK, UBB, UBA52, RPS27A, GTF2H2	962	37	16792	2.35882	1	0.94737	95.7362
GOTERM_BP_DIRECT	GO:0002756~MyD88-independent toll-like receptor signaling pathway	3	0.280374	0.16834	UBB, UBA52, RPS27A	962	13	16792	4.02815	1	0.954667	96.4897
GOTERM_BP_DIRECT	GO:0070423~nucleotide-binding oligomerization domain containing signaling pathway	4	0.373832	0.169603	UBB, IKBKB, UBA52, RPS27A	962	25	16792	2.79285	1	0.955097	96.5854
GOTERM_BP_DIRECT	GO:0033683~nucleotide-excision repair, DNA incision	5	0.46729	0.170632	POLK, UBB, UBA52, RPS27A, GTF2H2	962	38	16792	2.29675	1	0.9546	96.6614
UP_SEQ_FEATURE	domain:Ubiquitin-like	5	0.46729	0.201538	NFATC2IP, SUMO2, TCEB2, USP48, UBL5	1037	45	20063	2.14968	1	0.996356	98.3341
GOTERM_BP_DIRECT	GO:0035666~TRIF-dependent toll-like receptor signaling pathway	4	0.373832	0.214002	UBB, IKBKB, UBA52, RPS27A	962	28	16792	2.49361	1	0.975235	98.7419
GOTERM_BP_DIRECT	GO:0006294~nucleotide-excision repair, preincision complex assembly	4	0.373832	0.229318	UBB, UBA52, RPS27A, GTF2H2	962	29	16792	2.40763	1	0.980287	99.1201
GOTERM_BP_DIRECT	GO:0010803~regulation of tumor necrosis factor-mediated signaling pathway	4	0.373832	0.244828	UBB, IKBKB, UBA52, RPS27A	962	30	16792	2.32737	1	0.984032	99.3919
GOTERM_BP_DIRECT	GO:0006283~transcription-coupled nucleotide-excision repair	7	0.654206	0.248473	POLK, AQR, COPS6, UBB, UBA52, RPS27A, GTF2H2	962	74	16792	1.65118	1	0.984559	99.4431
GOTERM_BP_DIRECT	GO:0019058~viral life cycle	4	0.373832	0.260496	CHMP2A, UBB, UBA52, RPS27A	962	31	16792	2.2523	1	0.986305	99.5845
GOTERM_BP_DIRECT	GO:0016236~macroautophagy	7	0.654206	0.268002	TOMM7, ATG12, DYNLL1, PRKAA2, UBB, UBA52, RPS27A	962	76	16792	1.60773	1	0.987924	99.6548
GOTERM_BP_DIRECT	GO:0070987~error-free translesion synthesis	3	0.280374	0.297207	UBB, UBA52, RPS27A	962	19	16792	2.7561	1	0.991136	99.8353
GOTERM_BP_DIRECT	GO:0043488~regulation of mRNA stability	8	0.747664	0.376145	ZFP36L1, ZC3H14, XPO1, PUM1, UBB, UBA52, RPS27A, SAMD4A	962	103	16792	1.35575	1	0.996476	99.9811
GOTERM_BP_DIRECT	GO:0090263~positive regulation of canonical Wnt signaling pathway	9	0.841121	0.380822	CAV1, UBR5, SOX4, COL1A1, WLS, UBB, USP34, UBA52, RPS27A	962	120	16792	1.30915	1	0.996711	99.9835
GOTERM_BP_DIRECT	GO:0045742~positive regulation of epidermal growth factor receptor signaling pathway	3	0.280374	0.402871	UBB, UBA52, RPS27A	962	24	16792	2.18191	1	0.997403	99.9915
GOTERM_BP_DIRECT	GO:0060071~Wnt signaling pathway, planar cell polarity pathway	7	0.654206	0.43189	PFN1, AP2B1, AP2S1, UBB, DAAM1, UBA52, RPS27A	962	92	16792	1.32812	1	0.998133	99.9966
GOTERM_BP_DIRECT	GO:0007249~I-kappaB kinase/NF-kappaB signaling	5	0.46729	0.451929	HACD3, UBB, IKBKB, UBA52, RPS27A	962	60	16792	1.45461	1	0.998504	99.9982
GOTERM_BP_DIRECT	GO:0051092~positive regulation of NF-kappaB transcription factor activity	9	0.841121	0.494581	CFLAR, TRIM38, NPM1, NFKBIA, PIDD1, UBB, IKBKB, UBA52, RPS27A	962	133	16792	1.18119	1	0.999192	99.9996
GOTERM_BP_DIRECT	GO:0007254~JNK cascade	4	0.373832	0.537477	UBB, MAP2K7, UBA52, RPS27A	962	49	16792	1.42492	1	0.999503	99.9999
GOTERM_BP_DIRECT	GO:0002755~MyD88-dependent toll-like receptor signaling pathway	3	0.280374	0.570722	UBB, UBA52, RPS27A	962	33	16792	1.58685	1	0.999689	100
GOTERM_BP_DIRECT	GO:0031145~anaphase-promoting complex-dependent catabolic process	5	0.46729	0.669369	ANAPC5, PTTG1, UBB, UBA52, RPS27A	962	79	16792	1.10477	1	0.999947	100
GOTERM_BP_DIRECT	GO:0036297~interstrand cross-link repair	3	0.280374	0.779043	UBB, UBA52, RPS27A	962	49	16792	1.06869	1	0.999996	100
GOTERM_BP_DIRECT	GO:0051436~negative regulation of ubiquitin-protein ligase activity involved in mitotic cell cycle	4	0.373832	0.780217	ANAPC5, UBB, UBA52, RPS27A	962	71	16792	0.983397	1	0.999996	100
GOTERM_BP_DIRECT	GO:0033209~tumor necrosis factor-mediated signaling pathway	6	0.560748	0.812394	KRT18, ADAM17, UBB, IKBKB, UBA52, RPS27A	962	118	16792	0.887558	1	0.999999	100
GOTERM_BP_DIRECT	GO:0051437~positive regulation of ubiquitin-protein ligase activity involved in regulation of mitotic cell cycle transition	4	0.373832	0.817789	ANAPC5, UBB, UBA52, RPS27A	962	76	16792	0.9187	1	0.999999	100
GOTERM_BP_DIRECT	GO:0002223~stimulatory C-type lectin receptor signaling pathway	5	0.46729	0.858212	NFKBIA, UBB, IKBKB, UBA52, RPS27A	962	105	16792	0.831205	1	1	100
GOTERM_BP_DIRECT	GO:0000187~activation of MAPK activity	5	0.46729	0.867921	UBB, SOD1, UBA52, RPS27A, DUSP6	962	107	16792	0.815668	1	1	100
GOTERM_BP_DIRECT	GO:0038095~Fc-epsilon receptor signaling pathway	8	0.747664	0.889587	NFKBIA, UBB, IKBKB, MAP2K7, UBA52, RPS27A, PIK3R1, CALM2	962	178	16792	0.784508	1	1	100
GOTERM_BP_DIRECT	GO:0038061~NIK/NF-kappaB signaling	3	0.280374	0.898053	UBB, UBA52, RPS27A	962	66	16792	0.793423	1	1	100
GOTERM_BP_DIRECT	GO:0050852~T cell receptor signaling pathway	6	0.560748	0.930932	NFKBIA, UBB, IKBKB, UBA52, RPS27A, PIK3R1	962	148	16792	0.707647	1	1	100
Annotation Cluster 57	Enrichment Score: 0.9106644490614224
Category	Term	Count	%	PValue	Genes	List Total	Pop Hits	Pop Total	Fold Enrichment	Bonferroni	Benjamini	FDR
UP_SEQ_FEATURE	DNA-binding region:A.T hook 3	3	0.280374	0.0910316	KMT2A, ASH1L, BAZ2A	1037	10	20063	5.80415	1	0.946996	82.3862
UP_SEQ_FEATURE	DNA-binding region:A.T hook 1	3	0.280374	0.142694	KMT2A, ASH1L, BAZ2A	1037	13	20063	4.46473	1	0.986876	93.9257
UP_SEQ_FEATURE	DNA-binding region:A.T hook 2	3	0.280374	0.142694	KMT2A, ASH1L, BAZ2A	1037	13	20063	4.46473	1	0.986876	93.9257
Annotation Cluster 58	Enrichment Score: 0.8817446461283975
Category	Term	Count	%	PValue	Genes	List Total	Pop Hits	Pop Total	Fold Enrichment	Bonferroni	Benjamini	FDR
UP_SEQ_FEATURE	repeat:HAT 5	3	0.280374	0.107576	ZFC3H1, NRDE2, CSTF3	1037	11	20063	5.2765	1	0.967885	87.39
UP_SEQ_FEATURE	repeat:HAT 4	3	0.280374	0.124836	ZFC3H1, NRDE2, CSTF3	1037	12	20063	4.83679	1	0.97947	91.1611
UP_SEQ_FEATURE	repeat:HAT 2	3	0.280374	0.142694	ZFC3H1, NRDE2, CSTF3	1037	13	20063	4.46473	1	0.986876	93.9257
UP_SEQ_FEATURE	repeat:HAT 1	3	0.280374	0.142694	ZFC3H1, NRDE2, CSTF3	1037	13	20063	4.46473	1	0.986876	93.9257
UP_SEQ_FEATURE	repeat:HAT 3	3	0.280374	0.142694	ZFC3H1, NRDE2, CSTF3	1037	13	20063	4.46473	1	0.986876	93.9257
Annotation Cluster 59	Enrichment Score: 0.8766232336654726
Category	Term	Count	%	PValue	Genes	List Total	Pop Hits	Pop Total	Fold Enrichment	Bonferroni	Benjamini	FDR
UP_SEQ_FEATURE	domain:MPN	3	0.280374	0.124836	COPS6, PRPF8, MYSM1	1037	12	20063	4.83679	1	0.97947	91.1611
INTERPRO	IPR000555:JAB1/Mov34/MPN/PAD-1	3	0.280374	0.136134	COPS6, PRPF8, MYSM1	1011	12	18559	4.58927	1	0.966329	91.5816
SMART	SM00232:JAB_MPN	3	0.280374	0.137983	COPS6, PRPF8, MYSM1	604	11	10057	4.54109	1	0.80228	87.3268
Annotation Cluster 60	Enrichment Score: 0.8627456116126082
Category	Term	Count	%	PValue	Genes	List Total	Pop Hits	Pop Total	Fold Enrichment	Bonferroni	Benjamini	FDR
SMART	SM00356:ZnF_C3H1	7	0.654206	0.0711227	ZFP36L1, ZC3H14, ZC3H13, PRR3, ZC3H11A, MBNL1, RBM26	604	49	10057	2.37867	1	0.701243	64.1714
INTERPRO	IPR000571:Zinc finger, CCCH-type	7	0.654206	0.100516	ZFP36L1, ZC3H14, ZC3H13, PRR3, ZC3H11A, MBNL1, RBM26	1011	59	18559	2.17796	1	0.930631	83.3287
UP_SEQ_FEATURE	zinc finger region:C3H1-type	4	0.373832	0.148461	ZFC3H1, ZC3H13, PRR3, RBM26	1037	26	20063	2.97649	1	0.988722	94.6276
UP_SEQ_FEATURE	zinc finger region:C3H1-type 1	4	0.373832	0.213898	ZFP36L1, ZC3H14, ZC3H11A, MBNL1	1037	31	20063	2.49641	1	0.997417	98.7457
UP_SEQ_FEATURE	zinc finger region:C3H1-type 2	4	0.373832	0.213898	ZFP36L1, ZC3H14, ZC3H11A, MBNL1	1037	31	20063	2.49641	1	0.997417	98.7457
Annotation Cluster 61	Enrichment Score: 0.855278937973582
Category	Term	Count	%	PValue	Genes	List Total	Pop Hits	Pop Total	Fold Enrichment	Bonferroni	Benjamini	FDR
UP_SEQ_FEATURE	domain:SAP	4	0.373832	0.124424	PIAS2, PIAS1, ACIN1, CCAR1	1037	24	20063	3.22453	1	0.979893	91.085
INTERPRO	IPR003034:SAP domain	4	0.373832	0.139554	PIAS2, PIAS1, ACIN1, CCAR1	1011	24	18559	3.05951	1	0.967846	92.1279
SMART	SM00513:SAP	4	0.373832	0.156501	PIAS2, PIAS1, ACIN1, CCAR1	604	23	10057	2.89577	1	0.83598	90.6315
Annotation Cluster 62	Enrichment Score: 0.8533819503354794
Category	Term	Count	%	PValue	Genes	List Total	Pop Hits	Pop Total	Fold Enrichment	Bonferroni	Benjamini	FDR
INTERPRO	IPR002909:Cell surface receptor IPT/TIG	5	0.46729	0.0855714	EBF2, PLXNB2, EBF1, NFAT5, RBPJ	1011	31	18559	2.96082	1	0.9119	77.971
UP_SEQ_FEATURE	domain:IPT/TIG	3	0.280374	0.0910316	EBF2, EBF1, RBPJ	1037	10	20063	5.80415	1	0.946996	82.3862
SMART	SM00429:IPT	4	0.373832	0.218164	EBF2, PLXNB2, EBF1, NFAT5	604	27	10057	2.46676	1	0.90549	96.7416
INTERPRO	IPR014756:Immunoglobulin E-set	9	0.841121	0.227075	EBF2, PLXNB2, EBF1, SNRNP200, NFAT5, RBPJ, FLNA, SEC63, MYCBP2	1011	107	18559	1.54405	1	0.992696	98.7169
Annotation Cluster 63	Enrichment Score: 0.840506120581867
Category	Term	Count	%	PValue	Genes	List Total	Pop Hits	Pop Total	Fold Enrichment	Bonferroni	Benjamini	FDR
INTERPRO	IPR001751:S100/Calbindin-D9k, conserved site	5	0.46729	0.0443018	S100A4, S100A6, S100A11, S100A10, S100A2	1011	25	18559	3.67141	1	0.786518	53.5271
INTERPRO	IPR013787:S100/CaBP-9k-type, calcium binding, subdomain	5	0.46729	0.0702445	S100A4, S100A6, S100A11, S100A10, S100A2	1011	29	18559	3.16501	1	0.882991	70.8206
SMART	SM01394:SM01394	5	0.46729	0.0836605	S100A4, S100A6, S100A11, S100A10, S100A2	604	28	10057	2.97333	1	0.719644	70.3435
UP_SEQ_FEATURE	calcium-binding region:1; low affinity	3	0.280374	0.257005	S100A4, S100A11, S100A2	1037	19	20063	3.05481	1	0.999166	99.5505
UP_SEQ_FEATURE	calcium-binding region:2; high affinity	3	0.280374	0.315411	S100A4, S100A11, S100A2	1037	22	20063	2.63825	1	0.999769	99.8986
GOTERM_MF_DIRECT	GO:0048306~calcium-dependent protein binding	5	0.46729	0.429132	S100A4, S100A6, S100A11, VAMP2, DDX5	971	58	16881	1.49872	1	0.97641	99.9841
Annotation Cluster 64	Enrichment Score: 0.8306499665592941
Category	Term	Count	%	PValue	Genes	List Total	Pop Hits	Pop Total	Fold Enrichment	Bonferroni	Benjamini	FDR
GOTERM_MF_DIRECT	GO:0001671~ATPase activator activity	5	0.46729	0.0173601	TOR1AIP2, DNAJC7, DNAJC10, AHSA2, DNAJC2	971	18	16881	4.82921	1	0.303574	23.9156
UP_SEQ_FEATURE	domain:J	5	0.46729	0.280608	DNAJC7, DNAJC10, DNAJC2, SEC63, GAK	1037	52	20063	1.8603	1	0.999492	99.7501
INTERPRO	IPR001623:DnaJ domain	5	0.46729	0.301045	DNAJC7, DNAJC10, DNAJC2, SEC63, GAK	1011	51	18559	1.79971	1	0.997627	99.7659
SMART	SM00271:DnaJ	5	0.46729	0.324426	DNAJC7, DNAJC10, DNAJC2, SEC63, GAK	604	48	10057	1.73444	1	0.96494	99.5731
Annotation Cluster 65	Enrichment Score: 0.8292200483703768
Category	Term	Count	%	PValue	Genes	List Total	Pop Hits	Pop Total	Fold Enrichment	Bonferroni	Benjamini	FDR
UP_SEQ_FEATURE	DNA-binding region:HMG box	6	0.560748	0.0750149	TAF1, BBX, SOX4, WHSC1, TCF7L2, TCF7L1	1037	44	20063	2.63825	1	0.919335	75.797
INTERPRO	IPR009071:High mobility group (HMG) box domain	7	0.654206	0.0884725	HMGB3, KMT2C, BBX, SOX4, WHSC1, TCF7L2, TCF7L1	1011	57	18559	2.25438	1	0.915995	79.1235
SMART	SM00398:HMG	7	0.654206	0.102777	HMGB3, KMT2C, BBX, SOX4, WHSC1, TCF7L2, TCF7L1	604	54	10057	2.15842	1	0.74713	77.8823
GOTERM_BP_DIRECT	GO:0060070~canonical Wnt signaling pathway	5	0.46729	0.706753	TBL1XR1, PTK7, SOX4, TCF7L2, TCF7L1	962	83	16792	1.05152	1	0.999976	100
Annotation Cluster 66	Enrichment Score: 0.7951108671992614
Category	Term	Count	%	PValue	Genes	List Total	Pop Hits	Pop Total	Fold Enrichment	Bonferroni	Benjamini	FDR
INTERPRO	IPR011545:DNA/RNA helicase, DEAD/DEAH box type, N-terminal	9	0.841121	0.0332278	DDX17, DDX46, DDX39B, DICER1, SNRNP200, DHX15, DHX36, YTHDC2, DDX5	1011	69	18559	2.3944	1	0.713381	43.5306
GOTERM_BP_DIRECT	GO:0010501~RNA secondary structure unwinding	7	0.654206	0.0381059	DDX17, DDX46, DDX39B, AGO1, AGO3, DHX36, DDX5	962	44	16792	2.77698	1	0.680061	50.6364
GOTERM_MF_DIRECT	GO:0004004~ATP-dependent RNA helicase activity	8	0.747664	0.0784765	DDX17, DDX46, DDX39B, SNRNP200, DHX15, DHX36, YTHDC2, DDX5	971	65	16881	2.13971	1	0.65927	72.0724
INTERPRO	IPR014014:RNA helicase, DEAD-box type, Q motif	4	0.373832	0.327021	DDX17, DDX46, DDX39B, DDX5	1011	37	18559	1.98455	1	0.998578	99.8766
UP_SEQ_FEATURE	short sequence motif:Q motif	4	0.373832	0.341463	DDX17, DDX46, DDX39B, DDX5	1037	40	20063	1.93472	1	0.999896	99.95
INTERPRO	IPR000629:RNA helicase, ATP-dependent, DEAD-box, conserved site	3	0.280374	0.436402	DDX17, DDX46, DDX5	1011	27	18559	2.03967	1	0.999828	99.9939
UP_SEQ_FEATURE	short sequence motif:DEAD box	3	0.280374	0.561286	DDX17, DDX46, DDX5	1037	36	20063	1.61226	1	1	100
Annotation Cluster 67	Enrichment Score: 0.7933220172482056
Category	Term	Count	%	PValue	Genes	List Total	Pop Hits	Pop Total	Fold Enrichment	Bonferroni	Benjamini	FDR
UP_KEYWORDS	SH3-binding	7	0.654206	0.0999029	KHDRBS1, ADAM10, USP8, ADAM17, QKI, EVL, PTTG1	1047	63	20581	2.18412	1	0.401456	77.3609
UP_SEQ_FEATURE	short sequence motif:SH3-binding	6	0.560748	0.170331	ADAM10, USP8, ADAM17, MTA1, QKI, PTTG1	1037	57	20063	2.03654	1	0.993256	96.6535
GOTERM_MF_DIRECT	GO:0017124~SH3 domain binding	10	0.934579	0.244998	KHDRBS1, CTTNBP2, ADAM10, USP8, ABI2, ADAM17, GJA1, QKI, EVL, PTTG1	971	119	16881	1.46094	1	0.906086	98.7553
Annotation Cluster 68	Enrichment Score: 0.751973723844062
Category	Term	Count	%	PValue	Genes	List Total	Pop Hits	Pop Total	Fold Enrichment	Bonferroni	Benjamini	FDR
SMART	SM01190:SM01190	3	0.280374	0.117375	TMED4, TMED10, TMED9	604	10	10057	4.9952	1	0.753882	82.3954
INTERPRO	IPR015720:TMP21-related	3	0.280374	0.117517	TMED4, TMED10, TMED9	1011	11	18559	5.00647	1	0.949024	87.9267
UP_SEQ_FEATURE	domain:GOLD	3	0.280374	0.257005	TMED4, TMED10, TMED9	1037	19	20063	3.05481	1	0.999166	99.5505
INTERPRO	IPR009038:GOLD	3	0.280374	0.277005	TMED4, TMED10, TMED9	1011	19	18559	2.89849	1	0.997183	99.5852
Annotation Cluster 69	Enrichment Score: 0.7481625705450193
Category	Term	Count	%	PValue	Genes	List Total	Pop Hits	Pop Total	Fold Enrichment	Bonferroni	Benjamini	FDR
GOTERM_BP_DIRECT	GO:0034329~cell junction assembly	4	0.373832	0.0278705	ACTB, ACTG1, VMP1, FLNA	962	12	16792	5.81843	1	0.605307	40.1677
GOTERM_BP_DIRECT	GO:0070527~platelet aggregation	4	0.373832	0.418988	ACTB, ACTG1, CLIC1, FLNA	962	41	16792	1.70296	1	0.997888	99.9948
KEGG_PATHWAY	hsa05132:Salmonella infection	7	0.654206	0.487715	ACTB, ACTG1, PFN1, DYNC1LI2, PKN2, DYNC1H1, FLNA	463	83	6879	1.25304	1	0.957364	99.9832
Annotation Cluster 70	Enrichment Score: 0.744635765268348
Category	Term	Count	%	PValue	Genes	List Total	Pop Hits	Pop Total	Fold Enrichment	Bonferroni	Benjamini	FDR
GOTERM_BP_DIRECT	GO:0045737~positive regulation of cyclin-dependent protein serine/threonine kinase activity	5	0.46729	0.0453956	CCNT2, CCND2, CKS2, CCNL1, CCNL2	962	24	16792	3.63652	1	0.719495	57.0095
GOTERM_CC_DIRECT	GO:0000307~cyclin-dependent protein kinase holoenzyme complex	4	0.373832	0.0455966	CCND2, CKS2, CCNL1, CCNL2	1000	15	18224	4.85973	1	0.382752	50.3389
GOTERM_BP_DIRECT	GO:1901409~positive regulation of phosphorylation of RNA polymerase II C-terminal domain	3	0.280374	0.072793	CCNT2, CCNL1, CCNL2	962	8	16792	6.54574	1	0.816791	74.6738
GOTERM_MF_DIRECT	GO:0016538~cyclin-dependent protein serine/threonine kinase regulator activity	3	0.280374	0.211949	CCNT2, CCNL1, CCNL2	971	15	16881	3.47703	1	0.882784	97.5708
INTERPRO	IPR004367:Cyclin, C-terminal domain	3	0.280374	0.256404	CCND2, CCNL1, CCNL2	1011	18	18559	3.05951	1	0.995821	99.333
INTERPRO	IPR006671:Cyclin, N-terminal	4	0.373832	0.281616	CCNT2, CCND2, CCNL1, CCNL2	1011	34	18559	2.15966	1	0.997331	99.6278
SMART	SM01332:SM01332	3	0.280374	0.294176	CCND2, CCNL1, CCNL2	604	18	10057	2.77511	1	0.95229	99.2147
UP_KEYWORDS	Cyclin	4	0.373832	0.33241	CCNT2, CCND2, CCNL1, CCNL2	1047	40	20581	1.96571	1	0.776624	99.6664
SMART	SM00385:CYCLIN	4	0.373832	0.367446	CCNT2, CCND2, CCNL1, CCNL2	604	36	10057	1.85007	1	0.972671	99.8291
INTERPRO	IPR013763:Cyclin-like	4	0.373832	0.431835	CCNT2, CCND2, CCNL1, CCNL2	1011	44	18559	1.66882	1	0.999819	99.993
Annotation Cluster 71	Enrichment Score: 0.7360528826398458
Category	Term	Count	%	PValue	Genes	List Total	Pop Hits	Pop Total	Fold Enrichment	Bonferroni	Benjamini	FDR
INTERPRO	IPR000237:GRIP	3	0.280374	0.136134	GOLGA4, TRIP11, GCC2	1011	12	18559	4.58927	1	0.966329	91.5816
UP_SEQ_FEATURE	domain:GRIP	3	0.280374	0.142694	GOLGA4, TRIP11, GCC2	1037	13	20063	4.46473	1	0.986876	93.9257
GOTERM_BP_DIRECT	GO:0000042~protein targeting to Golgi	3	0.280374	0.318763	GOLGA4, TRIP11, GCC2	962	20	16792	2.6183	1	0.993391	99.9065
Annotation Cluster 72	Enrichment Score: 0.7335969039101222
Category	Term	Count	%	PValue	Genes	List Total	Pop Hits	Pop Total	Fold Enrichment	Bonferroni	Benjamini	FDR
UP_SEQ_FEATURE	repeat:WD 6	17	1.58879	0.0475221	COPA, TBL1XR1, RBBP4, IFT80, WDR6, TLE4, AHI1, HERC2, RBBP7, EML4, PHIP, WSB1, DCAF5, BRWD1, DMXL2, WDR26, WDR27	1037	196	20063	1.67807	1	0.821646	58.7623
INTERPRO	IPR017986:WD40-repeat-containing domain	24	2.24299	0.073535	COPA, TBL1XR1, RBBP4, IFT80, WDR6, WDR60, UBR4, TLE4, AHI1, DMWD, C5ORF42, RBBP7, EML4, PHIP, WSB1, DCAF5, BRWD1, SON, DMXL2, WDR26, WDR27, TENM3, ITFG2, NBEAL1	1011	306	18559	1.43977	1	0.890567	72.5187
UP_SEQ_FEATURE	repeat:WD 8	7	0.654206	0.088384	PHIP, TBL1XR1, BRWD1, DMXL2, WDR27, WDR6, EML4	1037	60	20063	2.25717	1	0.943569	81.429
UP_SEQ_FEATURE	repeat:WD 5	18	1.68224	0.107563	COPA, TBL1XR1, RBBP4, IFT80, WDR6, TLE4, AHI1, DMWD, HERC2, RBBP7, EML4, PHIP, WSB1, DCAF5, BRWD1, DMXL2, WDR26, WDR27	1037	237	20063	1.4694	1	0.968877	87.3867
UP_SEQ_FEATURE	repeat:WD 4	19	1.7757	0.111921	COPA, TBL1XR1, RBBP4, IFT80, WDR6, WDR60, TLE4, AHI1, DMWD, HERC2, RBBP7, EML4, PHIP, WSB1, DCAF5, BRWD1, DMXL2, WDR26, WDR27	1037	255	20063	1.44155	1	0.971369	88.4614
UP_SEQ_FEATURE	repeat:WD 2	20	1.86916	0.129987	COPA, TBL1XR1, RBBP4, IFT80, WDR6, WDR60, TLE4, AHI1, DMWD, HERC2, RBBP7, EML4, PHIP, WSB1, DCAF5, BRWD1, DMXL2, WDR26, WDR27, NBEAL1	1037	278	20063	1.39188	1	0.982088	92.0612
UP_SEQ_FEATURE	repeat:WD 1	20	1.86916	0.129987	COPA, TBL1XR1, RBBP4, IFT80, WDR6, WDR60, TLE4, AHI1, DMWD, HERC2, RBBP7, EML4, PHIP, WSB1, DCAF5, BRWD1, DMXL2, WDR26, WDR27, NBEAL1	1037	278	20063	1.39188	1	0.982088	92.0612
UP_SEQ_FEATURE	repeat:WD 3	19	1.7757	0.157513	COPA, TBL1XR1, RBBP4, IFT80, WDR6, WDR60, TLE4, AHI1, DMWD, HERC2, RBBP7, EML4, PHIP, WSB1, DCAF5, BRWD1, DMXL2, WDR26, WDR27	1037	269	20063	1.36653	1	0.991287	95.5769
UP_KEYWORDS	WD repeat	19	1.7757	0.186332	COPA, TBL1XR1, RBBP4, IFT80, WDR6, WDR60, TLE4, AHI1, DMWD, RBBP7, EML4, PHIP, WSB1, DCAF5, BRWD1, DMXL2, WDR26, WDR27, NBEAL1	1047	281	20581	1.32913	1	0.584126	94.5538
INTERPRO	IPR015943:WD40/YVTN repeat-like-containing domain	23	2.14953	0.193885	COPA, TBL1XR1, RBBP4, IFT80, PLXNB2, WDR6, WDR60, TLE4, AHI1, BIRC6, DMWD, RBBP7, EML4, PHIP, WSB1, DCAF5, SEMA6A, BRWD1, DMXL2, WDR26, WDR27, SEMA3E, NBEAL1	1011	331	18559	1.27557	1	0.987808	97.3875
INTERPRO	IPR001680:WD40 repeat	19	1.7757	0.209767	COPA, TBL1XR1, RBBP4, IFT80, WDR6, WDR60, TLE4, AHI1, DMWD, RBBP7, EML4, PHIP, WSB1, DCAF5, BRWD1, DMXL2, WDR26, WDR27, NBEAL1	1011	268	18559	1.30143	1	0.990933	98.134
UP_SEQ_FEATURE	repeat:WD 7	11	1.02804	0.254052	PHIP, TBL1XR1, BRWD1, DMXL2, IFT80, WDR27, WDR6, TLE4, AHI1, RBBP7, EML4	1037	151	20063	1.4094	1	0.999128	99.5168
SMART	SM00320:WD40	19	1.7757	0.340918	COPA, TBL1XR1, RBBP4, IFT80, WDR6, WDR60, TLE4, AHI1, DMWD, RBBP7, EML4, PHIP, WSB1, DCAF5, BRWD1, DMXL2, WDR26, WDR27, NBEAL1	604	267	10057	1.18488	1	0.969378	99.6973
INTERPRO	IPR020472:G-protein beta WD-40 repeat	7	0.654206	0.395031	WSB1, TBL1XR1, COPA, BRWD1, RBBP4, WDR26, RBBP7	1011	93	18559	1.38172	1	0.999644	99.9796
UP_SEQ_FEATURE	repeat:WD 9	4	0.373832	0.398489	DMXL2, WDR27, WDR6, EML4	1037	44	20063	1.75883	1	0.999978	99.9904
UP_SEQ_FEATURE	repeat:WD 10	3	0.280374	0.480596	DMXL2, WDR27, WDR6	1037	31	20063	1.87231	1	0.999998	99.9993
INTERPRO	IPR019775:WD40 repeat, conserved site	9	0.841121	0.687747	WSB1, PHIP, TBL1XR1, COPA, BRWD1, RBBP4, TLE4, RBBP7, EML4	1011	166	18559	0.995263	1	0.999999	100
Annotation Cluster 73	Enrichment Score: 0.7318433377461993
Category	Term	Count	%	PValue	Genes	List Total	Pop Hits	Pop Total	Fold Enrichment	Bonferroni	Benjamini	FDR
UP_SEQ_FEATURE	zinc finger region:CCHC-type	4	0.373832	0.148461	SRSF7, RBM4, SF1, RBBP6	1037	26	20063	2.97649	1	0.988722	94.6276
INTERPRO	IPR001878:Zinc finger, CCHC-type	5	0.46729	0.171315	ZCCHC11, SRSF7, RBM4, SF1, RBBP6	1011	40	18559	2.29463	1	0.983134	95.8326
SMART	SM00343:ZnF_C2HC	4	0.373832	0.250646	ZCCHC11, RBM4, SF1, RBBP6	604	29	10057	2.29664	1	0.928436	98.1944
Annotation Cluster 74	Enrichment Score: 0.7259352948189421
Category	Term	Count	%	PValue	Genes	List Total	Pop Hits	Pop Total	Fold Enrichment	Bonferroni	Benjamini	FDR
UP_SEQ_FEATURE	repeat:TPR 4	11	1.02804	0.033682	ZFC3H1, TTC14, ANAPC5, TTC37, DNAJC7, VPS13A, OGT, ASPH, TTC17, TTC3, TTC19	1037	100	20063	2.12819	1	0.747394	46.3857
UP_SEQ_FEATURE	repeat:TPR 3	13	1.21495	0.0880172	ZFC3H1, TTC14, ANAPC5, NASP, TTC37, DNAJC7, PRKDC, VPS13A, OGT, ASPH, TTC17, TTC3, TTC19	1037	150	20063	1.67675	1	0.944396	81.2926
UP_SEQ_FEATURE	repeat:TPR 2	13	1.21495	0.142049	ZFC3H1, TTC14, ANAPC5, NASP, TTC37, DNAJC7, PRKDC, VPS13A, OGT, ASPH, TTC17, TTC3, TTC19	1037	164	20063	1.53362	1	0.987084	93.842
UP_SEQ_FEATURE	repeat:TPR 1	13	1.21495	0.142049	ZFC3H1, TTC14, ANAPC5, NASP, TTC37, DNAJC7, PRKDC, VPS13A, OGT, ASPH, TTC17, TTC3, TTC19	1037	164	20063	1.53362	1	0.987084	93.842
UP_KEYWORDS	TPR repeat	13	1.21495	0.143772	ZFC3H1, TTC14, ANAPC5, NASP, TTC37, DNAJC7, PRKDC, VPS13A, OGT, ASPH, TTC17, TTC3, TTC19	1047	167	20581	1.53019	1	0.500666	88.8159
UP_SEQ_FEATURE	repeat:TPR 5	7	0.654206	0.21475	ZFC3H1, TTC37, DNAJC7, VPS13A, OGT, TTC17, TTC19	1037	78	20063	1.73628	1	0.997371	98.7702
INTERPRO	IPR013026:Tetratricopeptide repeat-containing domain	10	0.934579	0.291584	ZFC3H1, TTC14, NASP, TTC37, DNAJC7, OGT, ASPH, TTC17, TTC3, TTC19	1011	132	18559	1.39069	1	0.9975	99.7061
INTERPRO	IPR011990:Tetratricopeptide-like helical	15	1.40187	0.300028	CSTF3, TTC14, ANAPC5, NASP, TTC37, TTC17, TTC3, TTC19, ZFC3H1, NRDE2, DNAJC7, ASPH, OGT, TCF25, LRPPRC	1011	218	18559	1.2631	1	0.997708	99.76
INTERPRO	IPR019734:Tetratricopeptide repeat	10	0.934579	0.337185	TTC14, ANAPC5, NASP, TTC37, DNAJC7, OGT, ASPH, TTC17, TTC3, TTC19	1011	138	18559	1.33022	1	0.998821	99.9046
SMART	SM00028:TPR	10	0.934579	0.386278	TTC14, ANAPC5, NASP, TTC37, DNAJC7, OGT, ASPH, TTC17, TTC3, TTC19	604	131	10057	1.27104	1	0.976765	99.8877
UP_SEQ_FEATURE	repeat:TPR 6	5	0.46729	0.49155	TTC37, DNAJC7, VPS13A, OGT, TTC17	1037	70	20063	1.38194	1	0.999998	99.9995
Annotation Cluster 75	Enrichment Score: 0.7233103663133912
Category	Term	Count	%	PValue	Genes	List Total	Pop Hits	Pop Total	Fold Enrichment	Bonferroni	Benjamini	FDR
GOTERM_MF_DIRECT	GO:0030235~nitric-oxide synthase regulator activity	3	0.280374	0.0733146	EGFR, HSP90AA1, CALM2	971	8	16881	6.51944	1	0.64407	69.5284
GOTERM_BP_DIRECT	GO:0050999~regulation of nitric-oxide synthase activity	4	0.373832	0.184105	EGFR, CAV1, HSP90AA1, CALM2	962	26	16792	2.68543	1	0.96236	97.5208
KEGG_PATHWAY	hsa04915:Estrogen signaling pathway	8	0.747664	0.50097	EGFR, HSP90B1, HSP90AA1, ATF6B, CREB5, PIK3R1, CALM2, AKT2	463	99	6879	1.2006	1	0.957553	99.988
Annotation Cluster 76	Enrichment Score: 0.6822178582609806
Category	Term	Count	%	PValue	Genes	List Total	Pop Hits	Pop Total	Fold Enrichment	Bonferroni	Benjamini	FDR
GOTERM_BP_DIRECT	GO:0075733~intracellular transport of virus	9	0.841121	0.00795004	XPO1, NUP160, RAN, NUP107, UBB, TPR, KPNB1, UBA52, RPS27A	962	51	16792	3.08035	1	0.299535	13.501
GOTERM_MF_DIRECT	GO:0005487~nucleocytoplasmic transporter activity	4	0.373832	0.12952	XPO1, NUP160, NUP107, TPR	971	22	16881	3.16094	1	0.781097	88.5241
UP_KEYWORDS	Translocation	8	0.747664	0.134755	NUP160, RRBP1, EIF5A, NUP107, TPR, SEC62, SEC61A1, SEC61G	1047	84	20581	1.87211	1	0.483793	87.034
GOTERM_BP_DIRECT	GO:1900034~regulation of cellular response to heat	8	0.747664	0.136754	HSP90AA1, NUP160, DNAJC7, NUP107, TPR, DNAJC2, YWHAE, ATM	962	75	16792	1.8619	1	0.930057	93.0896
GOTERM_BP_DIRECT	GO:0006409~tRNA export from nucleus	4	0.373832	0.276287	NUP160, RAN, NUP107, TPR	962	32	16792	2.18191	1	0.988233	99.7193
GOTERM_CC_DIRECT	GO:0000776~kinetochore	7	0.654206	0.283895	XPO1, DYNLL1, NUP160, PPP1R12A, NUP107, TPR, ZNF207	1000	81	18224	1.57491	1	0.855501	99.3318
GOTERM_BP_DIRECT	GO:0031047~gene silencing by RNA	9	0.841121	0.30262	NUP160, RAN, DICER1, AGO1, CNOT2, NUP107, TPR, TNRC6B, TNRC6A	962	111	16792	1.41529	1	0.991687	99.8569
GOTERM_CC_DIRECT	GO:0034399~nuclear periphery	3	0.280374	0.321168	NUP107, TPR, KPNB1	1000	21	18224	2.60343	1	0.87539	99.7003
GOTERM_CC_DIRECT	GO:0005643~nuclear pore	6	0.560748	0.360395	NUP160, RAN, EIF5A, NUP107, TPR, KPNB1	1000	72	18224	1.51867	1	0.898988	99.8772
GOTERM_BP_DIRECT	GO:0007077~mitotic nuclear envelope disassembly	4	0.373832	0.464873	NUP160, NUP107, TPR, LPIN1	962	44	16792	1.58685	1	0.99871	99.9988
UP_KEYWORDS	Nuclear pore complex	4	0.373832	0.470445	NUP160, EIF5A, NUP107, TPR	1047	50	20581	1.57257	1	0.858683	99.9873
GOTERM_BP_DIRECT	GO:0010827~regulation of glucose transport	3	0.280374	0.570722	NUP160, NUP107, TPR	962	33	16792	1.58685	1	0.999689	100
Annotation Cluster 77	Enrichment Score: 0.6519413512311555
Category	Term	Count	%	PValue	Genes	List Total	Pop Hits	Pop Total	Fold Enrichment	Bonferroni	Benjamini	FDR
UP_KEYWORDS	Coated pit	6	0.560748	0.115948	AP2B1, APP, LRP1, AP2S1, AAK1, EPN1	1047	51	20581	2.3126	1	0.440868	82.4365
UP_KEYWORDS	Endocytosis	10	0.934579	0.162691	DBNL, AP2B1, APP, LRP1, AP2S1, AAK1, MRC2, ANKFY1, USP33, EPN1	1047	121	20581	1.62456	1	0.53373	91.8409
GOTERM_CC_DIRECT	GO:0005905~clathrin-coated pit	4	0.373832	0.586879	APP, LRP1, AAK1, EPN1	1000	55	18224	1.32538	1	0.973279	99.9998
Annotation Cluster 78	Enrichment Score: 0.6253060376553807
Category	Term	Count	%	PValue	Genes	List Total	Pop Hits	Pop Total	Fold Enrichment	Bonferroni	Benjamini	FDR
UP_KEYWORDS	Isomerase	12	1.1215	0.0463562	PUS7L, P4HB, TPI1, PDIA3, PPIL2, PGAM1, PDIA6, FKBP1A, PDIA4, FKBP10, NKTR, MIF	1047	122	20581	1.93349	1	0.248819	48.8241
UP_KEYWORDS	Rotamase	4	0.373832	0.30415	PPIL2, FKBP1A, FKBP10, NKTR	1047	38	20581	2.06917	1	0.751601	99.4011
GOTERM_BP_DIRECT	GO:0000413~protein peptidyl-prolyl isomerization	4	0.373832	0.449744	PPIL2, FKBP1A, FKBP10, NKTR	962	43	16792	1.62375	1	0.998472	99.9981
GOTERM_MF_DIRECT	GO:0003755~peptidyl-prolyl cis-trans isomerase activity	4	0.373832	0.497296	PPIL2, FKBP1A, FKBP10, NKTR	971	46	16881	1.51175	1	0.987372	99.9978
Annotation Cluster 79	Enrichment Score: 0.622120056317916
Category	Term	Count	%	PValue	Genes	List Total	Pop Hits	Pop Total	Fold Enrichment	Bonferroni	Benjamini	FDR
GOTERM_BP_DIRECT	GO:0002480~antigen processing and presentation of exogenous peptide antigen via MHC class I, TAP-independent	4	0.373832	0.0120992	LNPEP, HLA-A, HLA-B, B2M	962	9	16792	7.75791	1	0.402346	19.8439
GOTERM_BP_DIRECT	GO:0002474~antigen processing and presentation of peptide antigen via MHC class I	6	0.560748	0.0262684	PDIA3, HLA-A, HLA-B, CALR, CANX, B2M	962	30	16792	3.49106	1	0.587047	38.3503
UP_KEYWORDS	MHC I	3	0.280374	0.088569	HLA-A, HLA-B, B2M	1047	10	20581	5.89713	1	0.377191	72.9878
GOTERM_CC_DIRECT	GO:0042612~MHC class I protein complex	3	0.280374	0.118954	HLA-A, HLA-B, B2M	1000	11	18224	4.97018	1	0.624024	85.0351
GOTERM_CC_DIRECT	GO:0012507~ER to Golgi transport vesicle membrane	6	0.560748	0.154741	HLA-A, SEC22B, TMED10, HLA-B, LMAN1, B2M	1000	52	18224	2.10277	1	0.703215	91.9652
GOTERM_BP_DIRECT	GO:0001916~positive regulation of T cell mediated cytotoxicity	3	0.280374	0.16834	HLA-A, HLA-B, B2M	962	13	16792	4.02815	1	0.954667	96.4897
GOTERM_BP_DIRECT	GO:0060333~interferon-gamma-mediated signaling pathway	6	0.560748	0.383845	NCAM1, TRIM38, MT2A, HLA-A, HLA-B, B2M	962	71	16792	1.4751	1	0.996765	99.9849
KEGG_PATHWAY	hsa04612:Antigen processing and presentation	7	0.654206	0.402935	HSP90AA1, PDIA3, HLA-A, HLA-B, CALR, CANX, B2M	463	76	6879	1.36845	1	0.95692	99.8769
UP_SEQ_FEATURE	domain:Ig-like C1-type	3	0.280374	0.497458	HLA-A, HLA-B, B2M	1037	32	20063	1.8138	1	0.999998	99.9996
GOTERM_CC_DIRECT	GO:0030670~phagocytic vesicle membrane	4	0.373832	0.634777	ATG12, HLA-A, HLA-B, B2M	1000	59	18224	1.23553	1	0.98001	100
INTERPRO	IPR003006:Immunoglobulin/major histocompatibility complex, conserved site	4	0.373832	0.641171	NRCAM, HLA-A, HLA-B, B2M	1011	60	18559	1.2238	1	0.999998	100
GOTERM_BP_DIRECT	GO:0002479~antigen processing and presentation of exogenous peptide antigen via MHC class I, TAP-dependent	3	0.280374	0.882703	HLA-A, HLA-B, B2M	962	63	16792	0.831205	1	1	100
INTERPRO	IPR003597:Immunoglobulin C1-set	3	0.280374	0.891082	HLA-A, HLA-B, B2M	1011	68	18559	0.809871	1	1	100
SMART	SM00407:IGc1	3	0.280374	0.908241	HLA-A, HLA-B, B2M	604	65	10057	0.768492	1	0.999995	100
Annotation Cluster 80	Enrichment Score: 0.6218434103221181
Category	Term	Count	%	PValue	Genes	List Total	Pop Hits	Pop Total	Fold Enrichment	Bonferroni	Benjamini	FDR
UP_SEQ_FEATURE	domain:LisH	4	0.373832	0.173841	OFD1, TBL1XR1, MKLN1, WDR26	1037	28	20063	2.76388	1	0.993727	96.9019
INTERPRO	IPR006594:LisH dimerisation motif	4	0.373832	0.193542	OFD1, TBL1XR1, MKLN1, WDR26	1011	28	18559	2.62244	1	0.988328	97.3686
SMART	SM00667:LisH	3	0.280374	0.405082	OFD1, TBL1XR1, MKLN1	604	23	10057	2.17183	1	0.980257	99.9272
Annotation Cluster 81	Enrichment Score: 0.6181060566801003
Category	Term	Count	%	PValue	Genes	List Total	Pop Hits	Pop Total	Fold Enrichment	Bonferroni	Benjamini	FDR
INTERPRO	IPR009091:Regulator of chromosome condensation 1/beta-lactamase-inhibitor protein II	4	0.373832	0.114807	UBR5, HERC4, HERC2, MYCBP2	1011	22	18559	3.33765	1	0.947332	87.2842
UP_SEQ_FEATURE	repeat:RCC1 5	3	0.280374	0.237509	HERC4, HERC2, MYCBP2	1037	18	20063	3.22453	1	0.998592	99.2798
UP_SEQ_FEATURE	repeat:RCC1 4	3	0.280374	0.257005	HERC4, HERC2, MYCBP2	1037	19	20063	3.05481	1	0.999166	99.5505
UP_SEQ_FEATURE	repeat:RCC1 2	3	0.280374	0.276522	HERC4, HERC2, MYCBP2	1037	20	20063	2.90207	1	0.99945	99.723
UP_SEQ_FEATURE	repeat:RCC1 1	3	0.280374	0.276522	HERC4, HERC2, MYCBP2	1037	20	20063	2.90207	1	0.99945	99.723
UP_SEQ_FEATURE	repeat:RCC1 3	3	0.280374	0.276522	HERC4, HERC2, MYCBP2	1037	20	20063	2.90207	1	0.99945	99.723
INTERPRO	IPR000408:Regulator of chromosome condensation, RCC1	3	0.280374	0.318035	HERC4, HERC2, MYCBP2	1011	21	18559	2.62244	1	0.998333	99.8456
Annotation Cluster 82	Enrichment Score: 0.611461318167382
Category	Term	Count	%	PValue	Genes	List Total	Pop Hits	Pop Total	Fold Enrichment	Bonferroni	Benjamini	FDR
INTERPRO	IPR017891:Insulin-like growth factor binding protein, N-terminal, Cys-rich conserved site	3	0.280374	0.117517	CTGF, IGFBP4, CYR61	1011	11	18559	5.00647	1	0.949024	87.9267
UP_SEQ_FEATURE	domain:IGFBP N-terminal	3	0.280374	0.276522	CTGF, IGFBP4, CYR61	1037	20	20063	2.90207	1	0.99945	99.723
SMART	SM00121:IB	3	0.280374	0.294176	CTGF, IGFBP4, CYR61	604	18	10057	2.77511	1	0.95229	99.2147
INTERPRO	IPR000867:Insulin-like growth factor-binding protein, IGFBP	3	0.280374	0.297567	CTGF, IGFBP4, CYR61	1011	20	18559	2.75356	1	0.997707	99.7454
GOTERM_BP_DIRECT	GO:0001558~regulation of cell growth	7	0.654206	0.308085	CTGF, LTBP4, CLSTN1, H2AFY, SPOCK1, IGFBP4, CYR61	962	80	16792	1.52734	1	0.992362	99.8759
Annotation Cluster 83	Enrichment Score: 0.6107123617081328
Category	Term	Count	%	PValue	Genes	List Total	Pop Hits	Pop Total	Fold Enrichment	Bonferroni	Benjamini	FDR
GOTERM_CC_DIRECT	GO:0005868~cytoplasmic dynein complex	4	0.373832	0.0455966	DYNC1LI2, DYNLL1, TPR, DYNC1H1	1000	15	18224	4.85973	1	0.382752	50.3389
KEGG_PATHWAY	hsa04962:Vasopressin-regulated water reabsorption	6	0.560748	0.170471	DYNC1LI2, DYNLL1, CREB5, DCTN5, VAMP2, DYNC1H1	463	44	6879	2.02602	1	0.82281	91.1785
GOTERM_BP_DIRECT	GO:0019886~antigen processing and presentation of exogenous peptide antigen via MHC class II	8	0.747664	0.27377	AP2B1, DYNC1LI2, DYNLL1, AP2S1, CTSD, DCTN5, DYNC1H1, CANX	962	92	16792	1.51785	1	0.988334	99.7011
UP_KEYWORDS	Dynein	3	0.280374	0.505333	DYNC1LI2, DYNLL1, DYNC1H1	1047	33	20581	1.78701	1	0.8819	99.9952
UP_KEYWORDS	Motor protein	6	0.560748	0.822036	MYL6, DYNC1LI2, KIF1B, DYNLL1, DYNC1H1, MYO9A	1047	135	20581	0.87365	1	0.982186	100
Annotation Cluster 84	Enrichment Score: 0.5911032527899415
Category	Term	Count	%	PValue	Genes	List Total	Pop Hits	Pop Total	Fold Enrichment	Bonferroni	Benjamini	FDR
INTERPRO	IPR000562:Fibronectin, type II, collagen-binding	3	0.280374	0.175014	IGF2R, MRC2, FN1	1011	14	18559	3.93366	1	0.983886	96.1363
SMART	SM00059:FN2	3	0.280374	0.203416	IGF2R, MRC2, FN1	604	14	10057	3.568	1	0.892947	95.7742
INTERPRO	IPR013806:Kringle-like fold	3	0.280374	0.473404	IGF2R, MRC2, FN1	1011	29	18559	1.89901	1	0.999914	99.9981
Annotation Cluster 85	Enrichment Score: 0.5886957492672356
Category	Term	Count	%	PValue	Genes	List Total	Pop Hits	Pop Total	Fold Enrichment	Bonferroni	Benjamini	FDR
UP_SEQ_FEATURE	repeat:TPR 4	11	1.02804	0.033682	ZFC3H1, TTC14, ANAPC5, TTC37, DNAJC7, VPS13A, OGT, ASPH, TTC17, TTC3, TTC19	1037	100	20063	2.12819	1	0.747394	46.3857
UP_SEQ_FEATURE	repeat:TPR 5	7	0.654206	0.21475	ZFC3H1, TTC37, DNAJC7, VPS13A, OGT, TTC17, TTC19	1037	78	20063	1.73628	1	0.997371	98.7702
UP_SEQ_FEATURE	repeat:TPR 9	4	0.373832	0.227664	TTC37, DNAJC7, VPS13A, OGT	1037	32	20063	2.41839	1	0.998166	99.0905
UP_SEQ_FEATURE	repeat:TPR 10	3	0.280374	0.315411	TTC37, VPS13A, OGT	1037	22	20063	2.63825	1	0.999769	99.8986
UP_SEQ_FEATURE	repeat:TPR 8	4	0.373832	0.481064	TTC37, DNAJC7, VPS13A, OGT	1037	50	20063	1.54777	1	0.999998	99.9993
UP_SEQ_FEATURE	repeat:TPR 6	5	0.46729	0.49155	TTC37, DNAJC7, VPS13A, OGT, TTC17	1037	70	20063	1.38194	1	0.999998	99.9995
UP_SEQ_FEATURE	repeat:TPR 7	4	0.373832	0.616391	TTC37, DNAJC7, VPS13A, OGT	1037	61	20063	1.26867	1	1	100
Annotation Cluster 86	Enrichment Score: 0.5875342506882861
Category	Term	Count	%	PValue	Genes	List Total	Pop Hits	Pop Total	Fold Enrichment	Bonferroni	Benjamini	FDR
UP_KEYWORDS	Cell cycle	45	4.20561	0.0328321	KMT2E, CCNT2, USP8, RABGAP1, MITD1, PTTG1, ANKLE2, ZNF207, RPS3, NUMA1, MCM7, NIPBL, HMCN1, TFDP2, TPR, HELLS, CDK13, STAG1, CCAR1, TERF1, GOLGA2, CSNK1A1, KHDRBS1, TAF1, RBBP4, ERH, ANAPC5, POGZ, RAN, NASP, WDR6, PKN2, BIRC6, GAS2, ATM, RAD50, TTC19, GAK, SON, KRT18, RIF1, DMTF1, CCND2, CKS2, USP22	1047	650	20581	1.36088	0.999999	0.194461	37.572
UP_KEYWORDS	Cell division	23	2.14953	0.328432	CSNK1A1, CCNT2, ANAPC5, POGZ, RAN, PKN2, BIRC6, PTTG1, MITD1, ANKLE2, RPS3, ZNF207, TTC19, NUMA1, HMCN1, CCND2, CKS2, TPR, HELLS, CDK13, STAG1, TERF1, GOLGA2	1047	388	20581	1.16524	1	0.774536	99.6372
GOTERM_BP_DIRECT	GO:0007067~mitotic nuclear division	17	1.58879	0.346843	CSNK1A1, ANAPC5, RAN, BIRC6, PTTG1, RPS6, ANKLE2, RPS3, EML4, OFD1, SRSF2, NUMA1, PPP1R12A, TPR, HELLS, TERF1, STAG1	962	248	16792	1.19653	1	0.995274	99.9565
GOTERM_BP_DIRECT	GO:0051301~cell division	21	1.96262	0.536083	CSNK1A1, CCNT2, ANAPC5, POGZ, RAN, PKN2, BIRC6, PTTG1, ANKLE2, RPS3, ZNF207, NUMA1, HMCN1, CCND2, CKS2, TPR, TUBA1B, HELLS, CDK13, TERF1, STAG1	962	350	16792	1.04732	1	0.999512	99.9999
UP_KEYWORDS	Mitosis	14	1.30841	0.575731	CSNK1A1, ANAPC5, RAN, BIRC6, PTTG1, ANKLE2, RPS3, ZNF207, NUMA1, TPR, HELLS, STAG1, TERF1, GOLGA2	1047	262	20581	1.05038	1	0.912145	99.9994
Annotation Cluster 87	Enrichment Score: 0.5869750858263506
Category	Term	Count	%	PValue	Genes	List Total	Pop Hits	Pop Total	Fold Enrichment	Bonferroni	Benjamini	FDR
KEGG_PATHWAY	hsa05412:Arrhythmogenic right ventricular cardiomyopathy (ARVC)	10	0.934579	0.0339956	ACTB, ACTG1, CACNG8, ITGB8, DMD, GJA1, CACNA1C, ITGB1, TCF7L2, TCF7L1	463	67	6879	2.21753	0.999824	0.438109	36.1936
KEGG_PATHWAY	hsa05410:Hypertrophic cardiomyopathy (HCM)	9	0.841121	0.151148	ACTB, ACTG1, CACNG8, ITGB8, DMD, PRKAA2, CACNA1C, TPM1, ITGB1	463	78	6879	1.71432	1	0.818589	88.1025
KEGG_PATHWAY	hsa05414:Dilated cardiomyopathy	8	0.747664	0.333814	ACTB, ACTG1, CACNG8, ITGB8, DMD, CACNA1C, TPM1, ITGB1	463	84	6879	1.415	1	0.926005	99.4891
UP_SEQ_FEATURE	repeat:II	3	0.280374	0.39141	ITGB8, CACNA1C, ITGB1	1037	26	20063	2.23236	1	0.999974	99.9881
UP_SEQ_FEATURE	repeat:III	3	0.280374	0.39141	ITGB8, CACNA1C, ITGB1	1037	26	20063	2.23236	1	0.999974	99.9881
UP_SEQ_FEATURE	repeat:I	3	0.280374	0.39141	ITGB8, CACNA1C, ITGB1	1037	26	20063	2.23236	1	0.999974	99.9881
UP_SEQ_FEATURE	repeat:IV	3	0.280374	0.39141	ITGB8, CACNA1C, ITGB1	1037	26	20063	2.23236	1	0.999974	99.9881
GOTERM_BP_DIRECT	GO:0045214~sarcomere organization	3	0.280374	0.500429	ACTG1, TPM1, ITGB1	962	29	16792	1.80572	1	0.999233	99.9997
Annotation Cluster 88	Enrichment Score: 0.5770244158724388
Category	Term	Count	%	PValue	Genes	List Total	Pop Hits	Pop Total	Fold Enrichment	Bonferroni	Benjamini	FDR
UP_SEQ_FEATURE	domain:Importin N-terminal	3	0.280374	0.161043	XPO1, IPO9, KPNB1	1037	14	20063	4.14582	1	0.991922	95.9022
INTERPRO	IPR001494:Importin-beta, N-terminal	3	0.280374	0.23583	XPO1, IPO9, KPNB1	1011	17	18559	3.23948	1	0.993787	98.9417
SMART	SM00913:SM00913	3	0.280374	0.248662	XPO1, IPO9, KPNB1	604	16	10057	3.122	1	0.931107	98.1268
GOTERM_MF_DIRECT	GO:0008536~Ran GTPase binding	3	0.280374	0.520896	XPO1, IPO9, KPNB1	971	30	16881	1.73852	1	0.988769	99.999
Annotation Cluster 89	Enrichment Score: 0.5077292219172386
Category	Term	Count	%	PValue	Genes	List Total	Pop Hits	Pop Total	Fold Enrichment	Bonferroni	Benjamini	FDR
UP_SEQ_FEATURE	active site:Glycyl thioester intermediate	8	0.747664	0.0731668	UBR5, UBE2G2, HERC4, BIRC6, HERC2, UBE2H, TRIP12, HECTD1	1037	71	20063	2.17996	1	0.916031	74.9019
GOTERM_MF_DIRECT	GO:0061631~ubiquitin conjugating enzyme activity	4	0.373832	0.231116	TAF1, UBE2G2, BIRC6, UBE2H	971	29	16881	2.39795	1	0.897227	98.3459
INTERPRO	IPR000608:Ubiquitin-conjugating enzyme, E2	3	0.280374	0.674509	UBE2G2, BIRC6, UBE2H	1011	42	18559	1.31122	1	0.999999	100
INTERPRO	IPR016135:Ubiquitin-conjugating enzyme/RWD-like	3	0.280374	0.816491	UBE2G2, BIRC6, UBE2H	1011	56	18559	0.983415	1	1	100
Annotation Cluster 90	Enrichment Score: 0.5001221655561594
Category	Term	Count	%	PValue	Genes	List Total	Pop Hits	Pop Total	Fold Enrichment	Bonferroni	Benjamini	FDR
GOTERM_BP_DIRECT	GO:0035455~response to interferon-alpha	3	0.280374	0.108528	IFITM2, IFITM3, ADAR	962	10	16792	5.23659	1	0.892096	87.6003
GOTERM_BP_DIRECT	GO:0060337~type I interferon signaling pathway	7	0.654206	0.158578	EGR1, IFI27, IFITM2, IFITM3, HLA-A, HLA-B, ADAR	962	64	16792	1.90917	1	0.947313	95.6606
GOTERM_BP_DIRECT	GO:0045071~negative regulation of viral genome replication	4	0.373832	0.403394	IFITM2, IFITM3, ILF3, ADAR	962	40	16792	1.74553	1	0.997374	99.9916
UP_KEYWORDS	Antiviral defense	7	0.654206	0.541623	TRIM56, IFITM2, IFITM3, PCBP2, ILF3, NCBP3, ADAR	1047	116	20581	1.18621	1	0.900046	99.9983
GOTERM_BP_DIRECT	GO:0051607~defense response to virus	8	0.747664	0.839803	TRIM56, IFITM2, IFITM3, PCBP2, BNIP3, ILF3, NCBP3, ADAR	962	165	16792	0.846318	1	0.999999	100
Annotation Cluster 91	Enrichment Score: 0.49781654920137886
Category	Term	Count	%	PValue	Genes	List Total	Pop Hits	Pop Total	Fold Enrichment	Bonferroni	Benjamini	FDR
GOTERM_BP_DIRECT	GO:1904355~positive regulation of telomere capping	3	0.280374	0.232192	PNKP, MAP3K4, MAP2K7	962	16	16792	3.27287	1	0.980322	99.1779
GOTERM_BP_DIRECT	GO:0032212~positive regulation of telomere maintenance via telomerase	4	0.373832	0.276287	PNKP, MAP3K4, MAP2K7, ATM	962	32	16792	2.18191	1	0.988233	99.7193
GOTERM_BP_DIRECT	GO:0051973~positive regulation of telomerase activity	3	0.280374	0.500429	PNKP, MAP3K4, MAP2K7	962	29	16792	1.80572	1	0.999233	99.9997
Annotation Cluster 92	Enrichment Score: 0.49354924104551
Category	Term	Count	%	PValue	Genes	List Total	Pop Hits	Pop Total	Fold Enrichment	Bonferroni	Benjamini	FDR
INTERPRO	IPR016201:Plexin-like fold	6	0.560748	0.089266	SEMA6A, ITGB8, PLXNB2, SEMA3E, PTTG1IP, ITGB1	1011	44	18559	2.50324	1	0.91476	79.4288
SMART	SM00423:PSI	6	0.560748	0.10456	SEMA6A, ITGB8, PLXNB2, SEMA3E, PTTG1IP, ITGB1	604	42	10057	2.37867	1	0.742398	78.4859
GOTERM_BP_DIRECT	GO:0071526~semaphorin-plexin signaling pathway	4	0.373832	0.292169	SEMA6A, PLXNB2, SEMA3E, FLNA	962	33	16792	2.11579	1	0.990431	99.8125
UP_SEQ_FEATURE	domain:Sema	3	0.280374	0.480596	SEMA6A, PLXNB2, SEMA3E	1037	31	20063	1.87231	1	0.999998	99.9993
INTERPRO	IPR001627:Semaphorin/CD100 antigen	3	0.280374	0.508896	SEMA6A, PLXNB2, SEMA3E	1011	31	18559	1.77649	1	0.999966	99.9994
SMART	SM00630:Sema	3	0.280374	0.562466	SEMA6A, PLXNB2, SEMA3E	604	31	10057	1.61135	1	0.996975	99.999
KEGG_PATHWAY	hsa04360:Axon guidance	6	0.560748	0.935331	EPHA4, SEMA6A, PLXNB2, SEMA3E, CFL1, ITGB1	463	127	6879	0.701927	1	0.995441	100
Annotation Cluster 93	Enrichment Score: 0.4786113590851699
Category	Term	Count	%	PValue	Genes	List Total	Pop Hits	Pop Total	Fold Enrichment	Bonferroni	Benjamini	FDR
UP_SEQ_FEATURE	domain:EF-hand 2	14	1.30841	0.161463	MYL6, S100A4, S100A6, S100A11, FSTL1, PRKCSH, CALU, MACF1, FKBP10, DST, CALM2, SPTAN1, RCN2, S100A2	1037	185	20063	1.46411	1	0.991708	95.9393
UP_SEQ_FEATURE	domain:EF-hand 1	14	1.30841	0.161463	MYL6, S100A4, S100A6, S100A11, FSTL1, PRKCSH, CALU, MACF1, FKBP10, DST, CALM2, SPTAN1, RCN2, S100A2	1037	185	20063	1.46411	1	0.991708	95.9393
INTERPRO	IPR011992:EF-hand-like domain	20	1.86916	0.186178	S100A4, MYL6, S100A6, S100A11, S100A10, SPOCK1, FSTL1, SPARC, PRKCSH, CALU, EFHC1, MACF1, DMD, FKBP10, DST, CALM2, S100A2, RCN2, SPTAN1, CCAR1	1011	279	18559	1.31592	1	0.986618	96.9314
INTERPRO	IPR018247:EF-Hand 1, calcium-binding site	13	1.21495	0.263385	S100A4, S100A6, MACF1, S100A11, SPARC, FKBP10, PRKCSH, DST, CALM2, S100A2, CALU, RCN2, SPTAN1	1011	178	18559	1.34069	1	0.996274	99.4313
UP_SEQ_FEATURE	calcium-binding region:4	3	0.280374	0.276522	CALM2, CALU, RCN2	1037	20	20063	2.90207	1	0.99945	99.723
UP_SEQ_FEATURE	calcium-binding region:1	9	0.841121	0.341533	S100A6, MACF1, FKBP10, PRKCSH, DST, CALM2, CALU, RCN2, SPTAN1	1037	128	20063	1.36035	1	0.99989	99.9501
INTERPRO	IPR002048:EF-hand domain	15	1.40187	0.359871	S100A4, MYL6, S100A6, S100A11, FSTL1, PRKCSH, CALU, EFHC1, MACF1, FKBP10, DST, CALM2, SPTAN1, RCN2, S100A2	1011	228	18559	1.2077	1	0.999287	99.9471
SMART	SM00054:EFh	11	1.02804	0.362526	S100A4, MYL6, S100A6, MACF1, S100A11, FKBP10, DST, CALM2, CALU, RCN2, SPTAN1	604	144	10057	1.27193	1	0.972979	99.8096
UP_SEQ_FEATURE	calcium-binding region:2	8	0.747664	0.409049	S100A6, MACF1, FKBP10, DST, CALM2, CALU, RCN2, SPTAN1	1037	118	20063	1.31167	1	0.999984	99.993
GOTERM_MF_DIRECT	GO:0005509~calcium ion binding	43	4.01869	0.454385	S100A4, MYL6, S100A6, LTBP1, LTBP3, LTBP4, CLSTN1, FSTL1, SPOCK1, CALR, PRKCSH, CANX, CALU, HMCN1, MACF1, FAT3, PLA2G12A, TPT1, HSPA5, FBN2, ASPH, S100A2, S100A11, STIM2, CCDC47, S100A10, SPARC, MMP14, PCLO, NOTCH2, HSP90B1, FBLN1, EFHC1, LRP1, ADGRV1, SULF1, VCAN, FKBP10, DST, CALM2, CDH11, RCN2, SPTAN1	971	717	16881	1.04263	1	0.980974	99.9922
UP_SEQ_FEATURE	domain:EF-hand 3	5	0.46729	0.736972	MYL6, CALM2, CALU, RCN2, SPTAN1	1037	96	20063	1.00766	1	1	100
UP_SEQ_FEATURE	domain:EF-hand 4	3	0.280374	0.836951	CALM2, CALU, RCN2	1037	62	20063	0.936153	1	1	100
Annotation Cluster 94	Enrichment Score: 0.47716714363083407
Category	Term	Count	%	PValue	Genes	List Total	Pop Hits	Pop Total	Fold Enrichment	Bonferroni	Benjamini	FDR
GOTERM_MF_DIRECT	GO:0004843~thiol-dependent ubiquitin-specific protease activity	9	0.841121	0.0880874	ATXN3, USP8, USP47, USP48, USP22, ANKZF1, USP34, USP33, MYSM1	971	80	16881	1.95583	1	0.682798	76.288
GOTERM_BP_DIRECT	GO:0071108~protein K48-linked deubiquitination	4	0.373832	0.155453	ATXN3, USP8, USP34, USP33	962	24	16792	2.90922	1	0.945561	95.3582
GOTERM_MF_DIRECT	GO:0004197~cysteine-type endopeptidase activity	6	0.560748	0.272459	CFLAR, USP8, PDIA3, CTSD, USP34, USP33	971	61	16881	1.71002	1	0.922599	99.3019
GOTERM_BP_DIRECT	GO:0006511~ubiquitin-dependent protein catabolic process	13	1.21495	0.348849	USP8, UBE2G2, UBE2H, RNF213, TTC3, ATXN3, UBR5, USP47, USP22, USP48, USP34, USP33, FBXO22	962	182	16792	1.24681	1	0.995261	99.9588
GOTERM_BP_DIRECT	GO:0070536~protein K63-linked deubiquitination	3	0.280374	0.382253	ATXN3, USP8, USP33	962	23	16792	2.27678	1	0.996733	99.9842
INTERPRO	IPR018200:Peptidase C19, ubiquitin carboxyl-terminal hydrolase 2, conserved site	6	0.560748	0.398449	USP8, USP47, USP48, USP22, USP34, USP33	1011	76	18559	1.44924	1	0.99965	99.9815
INTERPRO	IPR001394:Peptidase C19, ubiquitin carboxyl-terminal hydrolase 2	6	0.560748	0.44193	USP8, USP47, USP48, USP22, USP34, USP33	1011	80	18559	1.37678	1	0.99984	99.9948
GOTERM_BP_DIRECT	GO:0016579~protein deubiquitination	7	0.654206	0.502872	ATXN3, USP8, DMWD, USP48, USP22, USP34, USP33	962	99	16792	1.23421	1	0.999254	99.9997
GOTERM_MF_DIRECT	GO:0036459~thiol-dependent ubiquitinyl hydrolase activity	5	0.46729	0.577162	USP8, USP48, USP22, USP34, USP33	971	70	16881	1.2418	1	0.993578	99.9999
UP_KEYWORDS	Thiol protease	8	0.747664	0.665344	ATXN3, USP8, USP47, USP48, USP22, USP34, USP33, SENP6	1047	153	20581	1.02782	1	0.944802	100
Annotation Cluster 95	Enrichment Score: 0.45929847785940536
Category	Term	Count	%	PValue	Genes	List Total	Pop Hits	Pop Total	Fold Enrichment	Bonferroni	Benjamini	FDR
UP_SEQ_FEATURE	repeat:ANK 6	9	0.841121	0.139295	NOTCH2, CTTNBP2, ANKRD28, EHMT1, ANKS3, PPP1R12A, KIDINS220, EHMT2, ANKFY1	1037	99	20063	1.75883	1	0.986368	93.4722
UP_SEQ_FEATURE	repeat:ANK 12	3	0.280374	0.237509	ANKRD28, KIDINS220, ANKFY1	1037	18	20063	3.22453	1	0.998592	99.2798
UP_SEQ_FEATURE	repeat:ANK 11	3	0.280374	0.372721	ANKRD28, KIDINS220, ANKFY1	1037	25	20063	2.32166	1	0.999953	99.9793
UP_SEQ_FEATURE	repeat:ANK 7	5	0.46729	0.410823	ANKRD28, EHMT1, KIDINS220, EHMT2, ANKFY1	1037	63	20063	1.53549	1	0.999983	99.9934
UP_SEQ_FEATURE	repeat:ANK 8	4	0.373832	0.426519	ANKRD28, EHMT1, KIDINS220, ANKFY1	1037	46	20063	1.68236	1	0.999989	99.996
UP_SEQ_FEATURE	repeat:ANK 10	3	0.280374	0.445851	ANKRD28, KIDINS220, ANKFY1	1037	29	20063	2.00143	1	0.999994	99.9978
UP_SEQ_FEATURE	repeat:ANK 9	3	0.280374	0.632598	ANKRD28, KIDINS220, ANKFY1	1037	41	20063	1.41565	1	1	100
Annotation Cluster 96	Enrichment Score: 0.45657665244360984
Category	Term	Count	%	PValue	Genes	List Total	Pop Hits	Pop Total	Fold Enrichment	Bonferroni	Benjamini	FDR
INTERPRO	IPR005818:Histone H1/H5	3	0.280374	0.175014	SHPRH, HIST1H1C, HP1BP3	1011	14	18559	3.93366	1	0.983886	96.1363
SMART	SM00526:H15	3	0.280374	0.181153	SHPRH, HIST1H1C, HP1BP3	604	13	10057	3.84246	1	0.86654	93.7991
GOTERM_BP_DIRECT	GO:0006334~nucleosome assembly	8	0.747664	0.525739	ATRX, SHPRH, RSF1, HIST1H1C, HP1BP3, NASP, NPM1, H2AFY	962	119	16792	1.17347	1	0.999445	99.9999
GOTERM_CC_DIRECT	GO:0000786~nucleosome	4	0.373832	0.894961	SHPRH, HIST1H1C, HP1BP3, H2AFY	1000	94	18224	0.775489	1	0.999424	100
Annotation Cluster 97	Enrichment Score: 0.44880880211338225
Category	Term	Count	%	PValue	Genes	List Total	Pop Hits	Pop Total	Fold Enrichment	Bonferroni	Benjamini	FDR
INTERPRO	IPR009080:Aminoacyl-tRNA synthetase, class 1a, anticodon-binding	3	0.280374	0.155339	IARS, LARS, MARS	1011	13	18559	4.23625	1	0.977863	94.2442
INTERPRO	IPR001412:Aminoacyl-tRNA synthetase, class I, conserved site	3	0.280374	0.195051	IARS, LARS, MARS	1011	15	18559	3.67141	1	0.987536	97.4507
UP_SEQ_FEATURE	short sequence motif:"KMSKS" region	3	0.280374	0.198829	IARS, LARS, MARS	1037	16	20063	3.62759	1	0.996358	98.2282
UP_SEQ_FEATURE	short sequence motif:"HIGH" region	3	0.280374	0.237509	IARS, LARS, MARS	1037	18	20063	3.22453	1	0.998592	99.2798
GOTERM_MF_DIRECT	GO:0004812~aminoacyl-tRNA ligase activity	3	0.280374	0.25534	IARS, LARS, MARS	971	17	16881	3.06797	1	0.910579	98.9963
UP_KEYWORDS	Aminoacyl-tRNA synthetase	3	0.280374	0.582114	IARS, LARS, MARS	1047	38	20581	1.55188	1	0.914479	99.9996
INTERPRO	IPR014729:Rossmann-like alpha/beta/alpha sandwich fold	3	0.280374	0.674509	IARS, LARS, MARS	1011	42	18559	1.31122	1	0.999999	100
GOTERM_BP_DIRECT	GO:0006418~tRNA aminoacylation for protein translation	3	0.280374	0.675788	IARS, LARS, MARS	962	40	16792	1.30915	1	0.999954	100
KEGG_PATHWAY	hsa00970:Aminoacyl-tRNA biosynthesis	3	0.280374	0.942338	IARS, LARS, MARS	463	66	6879	0.675339	1	0.996032	100
Annotation Cluster 98	Enrichment Score: 0.42773488019571015
Category	Term	Count	%	PValue	Genes	List Total	Pop Hits	Pop Total	Fold Enrichment	Bonferroni	Benjamini	FDR
UP_KEYWORDS	ATP-binding	81	7.57009	0.132921	RAD51B, DYNC1LI2, SPG7, ERCC6L2, PRPF4B, FIGNL1, UBE2G2, DICER1, PPIP5K2, TTLL7, PRKG1, DDR2, SETX, ATP2B1, PKM, ACTG1, DDX17, MCM7, MAP3K4, AAK1, DHX36, DYNC1H1, MAP2K7, CDK13, AKT2, EGFR, HSP90AA1, TRPM7, DDX39B, PKN2, UBE2H, MARK3, STK4, NLRP1, RAD50, GAK, MAP4K4, PNKP, KIF1B, CBWD1, PAPD4, BAZ1B, SNRNP200, NAIP, PRKD3, SMARCA4, FGFR1, PRKDC, MYO9A, IARS, CHD9, CHD7, DDX46, DHX15, LARS, CHD2, …	1047	1391	20581	1.14466	1	0.482374	86.6406
UP_SEQ_FEATURE	nucleotide phosphate-binding region:ATP	57	5.3271	0.261841	SPG7, DYNC1LI2, RAD51B, PRPF4B, ERCC6L2, FIGNL1, DICER1, PRKG1, DDR2, SETX, DDX17, MCM7, MAP3K4, AAK1, DHX36, DYNC1H1, MAP2K7, CDK13, AKT2, EGFR, TRPM7, DDX39B, PKN2, MARK3, STK4, NLRP1, RAD50, MAP4K4, PNKP, CBWD1, KIF1B, SNRNP200, PRKD3, SMARCA4, FGFR1, MYO9A, CHD9, CHD7, DDX46, CHD2, DHX15, ABCD4, PRKAA2, CHD4, HELLS, CSNK1A1, SHPRH, TAOK1, CNKSR3, YTHDC2, DDX5, ATRX, EPHA4, PLK2, IKBKB, PGK1, …	1037	994	20063	1.10944	1	0.999208	99.6008
GOTERM_MF_DIRECT	GO:0005524~ATP binding	87	8.13084	0.513132	ATP5D, RAD51B, DYNC1LI2, SPG7, ERCC6L2, PRPF4B, FIGNL1, UBE2G2, DICER1, PPIP5K2, TTLL7, MLH3, PRKG1, DDR2, SETX, ATP2B1, PKM, ACTG1, DDX17, MCM7, MAP3K4, AAK1, DHX36, DYNC1H1, MAP2K7, CDK13, AKT2, EGFR, HSP90AA1, TRPM7, DDX39B, PKN2, NDUFA13, UBE2H, MARK3, STK4, NLRP1, RAD50, GAK, MAP4K4, PNKP, KIF1B, CBWD1, PAPD4, BAZ1B, SNRNP200, NAIP, PRKD3, SMARCA4, FGFR1, PTK7, PRKDC, ITM2B, MYO9A, TRIB2, IA…	971	1495	16881	1.01171	1	0.987974	99.9987
INTERPRO	IPR027417:P-loop containing nucleoside triphosphate hydrolase	47	4.39252	0.632234	RHOJ, SBNO1, SPG7, DYNC1LI2, RAD51B, ERCC6L2, FIGNL1, YLPM1, DICER1, EIF5B, ARHGAP35, MYO9A, RNF213, SETX, CHD9, N4BP2L2, DDX17, CHD7, MCM7, DDX46, ARHGAP5, DHX15, CHD2, DHX36, ABCD4, DYNC1H1, KIAA1683, HELLS, CHD4, DLG1, RHOBTB3, EEF1A1, SHPRH, RAN, DDX39B, YTHDC2, DDX5, NLRP1, RAD50, ATRX, PNKP, CBWD1, KIF1B, AQR, SNRNP200, NAIP, SMARCA4	1011	879	18559	0.98155	1	0.999997	100
UP_KEYWORDS	Nucleotide-binding	89	8.31776	0.643559	RHOJ, RAD51B, DYNC1LI2, SPG7, ERCC6L2, PRPF4B, FIGNL1, HINT1, UBE2G2, DICER1, EIF5B, PPIP5K2, TTLL7, PRKG1, DDR2, SETX, ATP2B1, PKM, ACTG1, DDX17, MCM7, MAP3K4, AAK1, DHX36, DYNC1H1, TUBA1B, MAP2K7, CDK13, CYR61, AKT2, EGFR, HSP90AA1, TRPM7, RAN, DDX39B, PKN2, UBE2H, MARK3, STK4, NLRP1, RAD50, GAK, MAP4K4, PNKP, KIF1B, CBWD1, PAPD4, BAZ1B, SNRNP200, NAIP, PRKD3, SMARCA4, FGFR1, PRKDC, MYO9A, IARS…	1047	1788	20581	0.978458	1	0.938011	100
Annotation Cluster 99	Enrichment Score: 0.381534023113382
Category	Term	Count	%	PValue	Genes	List Total	Pop Hits	Pop Total	Fold Enrichment	Bonferroni	Benjamini	FDR
GOTERM_MF_DIRECT	GO:0019903~protein phosphatase binding	7	0.654206	0.152507	EGFR, HSP90B1, HSP90AA1, ANAPC5, SNX3, MAP2K7, PIK3R1	971	63	16881	1.93169	1	0.819001	92.4425
KEGG_PATHWAY	hsa04915:Estrogen signaling pathway	8	0.747664	0.50097	EGFR, HSP90B1, HSP90AA1, ATF6B, CREB5, PIK3R1, CALM2, AKT2	463	99	6879	1.2006	1	0.957553	99.988
KEGG_PATHWAY	hsa04914:Progesterone-mediated oocyte maturation	4	0.373832	0.9382	HSP90AA1, ANAPC5, PIK3R1, AKT2	463	87	6879	0.683101	1	0.995648	100
Annotation Cluster 100	Enrichment Score: 0.33864695789654137
Category	Term	Count	%	PValue	Genes	List Total	Pop Hits	Pop Total	Fold Enrichment	Bonferroni	Benjamini	FDR
GOTERM_MF_DIRECT	GO:0016874~ligase activity	22	2.05607	0.0973094	LTN1, SHPRH, PPIL2, ZNF451, UBR4, HERC4, BIRC6, RNF216, HERC2, RBBP6, RNF213, TTC3, MYCBP2, TRIM38, TRIM56, RNF115, TRIM33, UBR5, PIAS2, PIAS1, TRIP12, HECTD1	971	270	16881	1.41657	1	0.706085	79.7664
UP_KEYWORDS	Ligase	20	1.86916	0.400887	LTN1, SHPRH, PPIL2, ZNF451, UBR4, RNF216, TTLL7, RBBP6, RNF213, TTC3, MYCBP2, IARS, TRIM38, TRIM56, RNF115, TRIM33, LARS, PIAS2, PIAS1, MARS	1047	347	20581	1.13297	1	0.819191	99.9276
INTERPRO	IPR001841:Zinc finger, RING-type	17	1.58879	0.542369	LTN1, SHPRH, KMT2C, MEX3A, WHSC1, RBBP6, RNF213, TTC3, TRIM73, MYCBP2, TRIM56, TRIM38, RNF115, SCAF11, BAZ1B, TRIM33, MDM4	1011	295	18559	1.05787	1	0.999985	99.9998
UP_SEQ_FEATURE	zinc finger region:RING-type	12	1.1215	0.646199	TRIM38, TRIM56, RNF115, SHPRH, LTN1, TRIM33, KMT2C, MEX3A, MDM4, RNF213, TTC3, TRIM73	1037	230	20063	1.00942	1	1	100
SMART	SM00184:RING	14	1.30841	0.710718	SHPRH, KMT2C, MEX3A, WHSC1, RNF213, RBBP6, TTC3, TRIM73, MYCBP2, TRIM56, TRIM38, RNF115, SCAF11, TRIM33	604	244	10057	0.955366	1	0.999615	100
INTERPRO	IPR017907:Zinc finger, RING-type, conserved site	6	0.560748	0.956273	TRIM38, TRIM56, SHPRH, SCAF11, TRIM33, TRIM73	1011	169	18559	0.65173	1	1	100
Annotation Cluster 101	Enrichment Score: 0.33129824366336674
Category	Term	Count	%	PValue	Genes	List Total	Pop Hits	Pop Total	Fold Enrichment	Bonferroni	Benjamini	FDR
GOTERM_CC_DIRECT	GO:0072372~primary cilium	8	0.747664	0.135079	CSNK1A1, IFT80, DYNLL1, WDR60, FAM179B, AHI1, FLCN, GLI3	1000	78	18224	1.86913	1	0.653538	88.6561
UP_KEYWORDS	Joubert syndrome	4	0.373832	0.155694	TMEM67, OFD1, AHI1, C5ORF42	1047	27	20581	2.91217	1	0.527395	90.8241
GOTERM_CC_DIRECT	GO:0097542~ciliary tip	4	0.373832	0.436544	IFT80, DYNLL1, WDR60, GLI3	1000	44	18224	1.65673	1	0.932514	99.9817
GOTERM_CC_DIRECT	GO:0005929~cilium	10	0.934579	0.447324	PKM, OFD1, CAV1, IFT80, WDR60, FAM179B, AHI1, TTLL7, FLCN, GLI3	1000	151	18224	1.20689	1	0.937166	99.9863
UP_KEYWORDS	Cilium biogenesis/degradation	8	0.747664	0.630993	TMEM67, OFD1, WDR60, FAM179B, AHI1, C5ORF42, TTC17, FLNA	1047	148	20581	1.06255	1	0.933076	99.9999
GOTERM_BP_DIRECT	GO:0042384~cilium assembly	7	0.654206	0.720078	TMEM67, IFT80, PCNT, AHI1, C5ORF42, FLNA, RAB3IP	962	124	16792	0.98538	1	0.999981	100
UP_KEYWORDS	Ciliopathy	6	0.560748	0.773467	TMEM67, OFD1, IFT80, WDR60, AHI1, C5ORF42	1047	126	20581	0.936053	1	0.974839	100
GOTERM_BP_DIRECT	GO:0060271~cilium morphogenesis	7	0.654206	0.797301	TMEM67, OFD1, IFT80, DYNLL1, AHI1, C5ORF42, FLNA	962	136	16792	0.898435	1	0.999998	100
UP_KEYWORDS	Cilium	8	0.747664	0.906438	TMEM67, OFD1, IFT80, CATSPER2, WDR60, AHI1, TTLL7, GLI3	1047	207	20581	0.759695	1	0.994148	100
Annotation Cluster 102	Enrichment Score: 0.32063292740674326
Category	Term	Count	%	PValue	Genes	List Total	Pop Hits	Pop Total	Fold Enrichment	Bonferroni	Benjamini	FDR
KEGG_PATHWAY	hsa04150:mTOR signaling pathway	7	0.654206	0.191972	TSC2, RICTOR, PRKAA2, IKBKB, RPS6, PIK3R1, AKT2	463	58	6879	1.79314	1	0.840797	93.7284
KEGG_PATHWAY	hsa04910:Insulin signaling pathway	10	0.934579	0.586381	EXOC7, PHKB, TSC2, FLOT1, PRKAA2, IKBKB, RPS6, PIK3R1, CALM2, AKT2	463	138	6879	1.07663	1	0.968206	99.999
KEGG_PATHWAY	hsa04152:AMPK signaling pathway	5	0.46729	0.969804	TSC2, CREB5, PRKAA2, PIK3R1, AKT2	463	123	6879	0.603961	1	0.99807	100
Annotation Cluster 103	Enrichment Score: 0.3198301778964177
Category	Term	Count	%	PValue	Genes	List Total	Pop Hits	Pop Total	Fold Enrichment	Bonferroni	Benjamini	FDR
GOTERM_BP_DIRECT	GO:0007131~reciprocal meiotic recombination	4	0.373832	0.244828	RAD51B, MLH3, ATM, RAD50	962	30	16792	2.32737	1	0.984032	99.3919
GOTERM_BP_DIRECT	GO:0000732~strand displacement	3	0.280374	0.443076	RAD51B, ATM, RAD50	962	26	16792	2.01407	1	0.998295	99.9976
GOTERM_BP_DIRECT	GO:0000731~DNA synthesis involved in DNA repair	3	0.280374	0.603078	RAD51B, ATM, RAD50	962	35	16792	1.49617	1	0.999824	100
GOTERM_BP_DIRECT	GO:0000724~double-strand break repair via homologous recombination	4	0.373832	0.803466	RAD51B, SFPQ, ATM, RAD50	962	74	16792	0.94353	1	0.999998	100
Annotation Cluster 104	Enrichment Score: 0.3191643229984374
Category	Term	Count	%	PValue	Genes	List Total	Pop Hits	Pop Total	Fold Enrichment	Bonferroni	Benjamini	FDR
GOTERM_MF_DIRECT	GO:0004602~glutathione peroxidase activity	3	0.280374	0.341972	GPX4, GSTK1, GPX8	971	21	16881	2.4836	1	0.951161	99.8544
GOTERM_BP_DIRECT	GO:0098869~cellular oxidant detoxification	6	0.560748	0.372307	PXDN, GPX4, GSTK1, TXN, PRDX5, GPX8	962	70	16792	1.49617	1	0.996361	99.9789
KEGG_PATHWAY	hsa00480:Glutathione metabolism	3	0.280374	0.866194	GPX4, GSTK1, GPX8	463	51	6879	0.873968	1	0.987381	100
Annotation Cluster 105	Enrichment Score: 0.31724684663947894
Category	Term	Count	%	PValue	Genes	List Total	Pop Hits	Pop Total	Fold Enrichment	Bonferroni	Benjamini	FDR
UP_KEYWORDS	Kinetochore	7	0.654206	0.38967	CSNK1A1, KANSL1, TP53BP1, DCTN5, NUP107, TPR, ZNF207	1047	99	20581	1.3899	1	0.817447	99.9059
GOTERM_CC_DIRECT	GO:0000777~condensed chromosome kinetochore	6	0.560748	0.522406	CSNK1A1, KANSL1, TP53BP1, DCTN5, NUP107, ZNF207	1000	87	18224	1.25683	1	0.959396	99.9985
UP_KEYWORDS	Centromere	8	0.747664	0.548977	CSNK1A1, KANSL1, TP53BP1, DCTN5, NUP107, TPR, ZNF207, STAG1	1047	137	20581	1.14786	1	0.903181	99.9987
Annotation Cluster 106	Enrichment Score: 0.30896342189829606
Category	Term	Count	%	PValue	Genes	List Total	Pop Hits	Pop Total	Fold Enrichment	Bonferroni	Benjamini	FDR
KEGG_PATHWAY	hsa05131:Shigellosis	6	0.560748	0.431415	ACTB, ACTG1, PFN1, NFKBIA, IKBKB, ITGB1	463	64	6879	1.39289	1	0.956574	99.9348
KEGG_PATHWAY	hsa05130:Pathogenic Escherichia coli infection	5	0.46729	0.450643	ACTB, ACTG1, TUBA1B, ITGB1, TUBB4B	463	51	6879	1.45661	1	0.958671	99.9583
KEGG_PATHWAY	hsa05100:Bacterial invasion of epithelial cells	6	0.560748	0.608671	ACTB, ACTG1, CAV1, ITGB1, PIK3R1, FN1	463	78	6879	1.14288	1	0.966603	99.9995
Annotation Cluster 107	Enrichment Score: 0.3074260944702875
Category	Term	Count	%	PValue	Genes	List Total	Pop Hits	Pop Total	Fold Enrichment	Bonferroni	Benjamini	FDR
UP_KEYWORDS	Dioxygenase	6	0.560748	0.414886	P4HB, PLOD3, ASPH, JMJD1C, KDM5A, KDM5B	1047	83	20581	1.421	1	0.826033	99.9481
UP_SEQ_FEATURE	domain:JmjC	3	0.280374	0.497458	JMJD1C, KDM5A, KDM5B	1037	32	20063	1.8138	1	0.999998	99.9996
SMART	SM00558:JmjC	3	0.280374	0.525997	JMJD1C, KDM5A, KDM5B	604	29	10057	1.72248	1	0.995177	99.9969
INTERPRO	IPR003347:JmjC domain	3	0.280374	0.542784	JMJD1C, KDM5A, KDM5B	1011	33	18559	1.66882	1	0.999984	99.9998
Annotation Cluster 108	Enrichment Score: 0.26859540342224714
Category	Term	Count	%	PValue	Genes	List Total	Pop Hits	Pop Total	Fold Enrichment	Bonferroni	Benjamini	FDR
INTERPRO	IPR000306:Zinc finger, FYVE-type	3	0.280374	0.473404	ZFYVE16, HGS, ANKFY1	1011	29	18559	1.89901	1	0.999914	99.9981
SMART	SM00064:FYVE	3	0.280374	0.525997	ZFYVE16, HGS, ANKFY1	604	29	10057	1.72248	1	0.995177	99.9969
INTERPRO	IPR017455:Zinc finger, FYVE-related	3	0.280374	0.559107	ZFYVE16, HGS, ANKFY1	1011	34	18559	1.61974	1	0.999988	99.9999
UP_SEQ_FEATURE	zinc finger region:FYVE-type	3	0.280374	0.605214	ZFYVE16, HGS, ANKFY1	1037	39	20063	1.48824	1	1	100
Annotation Cluster 109	Enrichment Score: 0.26584658882586193
Category	Term	Count	%	PValue	Genes	List Total	Pop Hits	Pop Total	Fold Enrichment	Bonferroni	Benjamini	FDR
INTERPRO	IPR004827:Basic-leucine zipper domain	6	0.560748	0.169287	CREBRF, CEBPB, CREBZF, ATF6B, CREB5, FOSB	1011	54	18559	2.03967	1	0.983099	95.6568
UP_SEQ_FEATURE	domain:Leucine-zipper	8	0.747664	0.366368	CEBPB, CREBZF, ATF6B, PRKDC, CREB5, FOSB, TCF4, IKBKB	1037	113	20063	1.36971	1	0.999949	99.9752
KEGG_PATHWAY	hsa05031:Amphetamine addiction	6	0.560748	0.458262	GRIN2B, ATF6B, CREB5, FOSB, CACNA1C, CALM2	463	66	6879	1.35068	1	0.958934	99.9652
SMART	SM00338:BRLZ	4	0.373832	0.597421	CEBPB, ATF6B, CREB5, FOSB	604	51	10057	1.30593	1	0.997899	99.9997
KEGG_PATHWAY	hsa05030:Cocaine addiction	4	0.373832	0.6487	GRIN2B, ATF6B, CREB5, FOSB	463	49	6879	1.21285	1	0.967973	99.9999
UP_SEQ_FEATURE	DNA-binding region:Basic motif	7	0.654206	0.852098	CEBPB, CREBZF, ATF6B, MGA, CREB5, FOSB, TCF4	1037	163	20063	0.830859	1	1	100
KEGG_PATHWAY	hsa04728:Dopaminergic synapse	7	0.654206	0.868819	GRIN2B, ATF6B, CREB5, CACNA1C, GNG5, CALM2, AKT2	463	128	6879	0.812517	1	0.987444	100
KEGG_PATHWAY	hsa05034:Alcoholism	9	0.841121	0.915859	GRIN2B, ATF6B, H2AFY, CREB5, FOSB, HDAC9, GNG5, HDAC7, CALM2	463	177	6879	0.755464	1	0.993732	100
Annotation Cluster 110	Enrichment Score: 0.26511634040501386
Category	Term	Count	%	PValue	Genes	List Total	Pop Hits	Pop Total	Fold Enrichment	Bonferroni	Benjamini	FDR
UP_SEQ_FEATURE	metal ion-binding site:Magnesium	8	0.747664	0.409049	ATP2B1, PKM, EYA4, POLK, NUDT3, ATP1A1, ATP8A1, ENO1	1037	118	20063	1.31167	1	0.999984	99.993
INTERPRO	IPR023214:HAD-like domain	6	0.560748	0.452693	ATP2B1, PNKP, EYA4, ATP1A1, LPIN1, ATP8A1	1011	81	18559	1.35978	1	0.999871	99.9963
INTERPRO	IPR018303:P-type ATPase, phosphorylation site	3	0.280374	0.590489	ATP2B1, ATP1A1, ATP8A1	1011	36	18559	1.52976	1	0.999995	100
INTERPRO	IPR023299:P-type ATPase, cytoplasmic domain N	3	0.280374	0.590489	ATP2B1, ATP1A1, ATP8A1	1011	36	18559	1.52976	1	0.999995	100
INTERPRO	IPR001757:Cation-transporting P-type ATPase	3	0.280374	0.590489	ATP2B1, ATP1A1, ATP8A1	1011	36	18559	1.52976	1	0.999995	100
INTERPRO	IPR008250:P-type ATPase, A domain	3	0.280374	0.590489	ATP2B1, ATP1A1, ATP8A1	1011	36	18559	1.52976	1	0.999995	100
UP_SEQ_FEATURE	active site:4-aspartylphosphate intermediate	3	0.280374	0.619095	ATP2B1, ATP1A1, ATP8A1	1037	40	20063	1.45104	1	1	100
Annotation Cluster 111	Enrichment Score: 0.25952064412346376
Category	Term	Count	%	PValue	Genes	List Total	Pop Hits	Pop Total	Fold Enrichment	Bonferroni	Benjamini	FDR
GOTERM_MF_DIRECT	GO:0051287~NAD binding	5	0.46729	0.172365	LDHA, CTBP2, PHGDH, AHCYL1, GAPDH	971	38	16881	2.28752	1	0.836375	94.78
UP_SEQ_FEATURE	binding site:NAD	4	0.373832	0.533029	LDHA, CTBP2, PHGDH, GAPDH	1037	54	20063	1.43312	1	0.999999	99.9999
UP_SEQ_FEATURE	nucleotide phosphate-binding region:NAD	5	0.46729	0.597783	LDHA, CTBP2, PHGDH, SIRT7, GAPDH	1037	80	20063	1.2092	1	1	100
UP_KEYWORDS	NAD	6	0.560748	0.946522	LDHA, CTBP2, PHGDH, AHCYL1, SIRT7, GAPDH	1047	175	20581	0.673958	1	0.997509	100
INTERPRO	IPR016040:NAD(P)-binding domain	6	0.560748	0.969446	RDH11, LDHA, CTBP2, PHGDH, AHCYL1, GAPDH	1011	179	18559	0.615321	1	1	100
Annotation Cluster 112	Enrichment Score: 0.25842517539912346
Category	Term	Count	%	PValue	Genes	List Total	Pop Hits	Pop Total	Fold Enrichment	Bonferroni	Benjamini	FDR
GOTERM_BP_DIRECT	GO:0070588~calcium ion transmembrane transport	11	1.02804	0.14379	ATP2B1, ORAI2, MCOLN3, CATSPER2, CACNG8, TRPM7, STIM2, FKBP1A, ASPH, CACNA1C, TMCO1	962	119	16792	1.61352	1	0.935884	94.0444
UP_KEYWORDS	Calcium transport	7	0.654206	0.380495	ATP2B1, CATSPER2, CACNG8, TRPM7, STIM2, CACNA1C, TMCO1	1047	98	20581	1.40408	1	0.812864	99.8839
UP_KEYWORDS	Calcium channel	5	0.46729	0.43376	CATSPER2, CACNG8, TRPM7, CACNA1C, TMCO1	1047	66	20581	1.48918	1	0.839327	99.9673
GOTERM_MF_DIRECT	GO:0005245~voltage-gated calcium channel activity	3	0.280374	0.677982	CATSPER2, CACNG8, CACNA1C	971	40	16881	1.30389	1	0.997493	100
INTERPRO	IPR005821:Ion transport domain	3	0.280374	0.98138	CATSPER2, TRPM7, CACNA1C	1011	106	18559	0.51954	1	1	100
UP_KEYWORDS	Voltage-gated channel	4	0.373832	0.983842	CATSPER2, CACNG8, CLIC1, CACNA1C	1047	150	20581	0.52419	1	0.999718	100
UP_KEYWORDS	Ion channel	8	0.747664	0.99935	MCOLN3, GRIN2B, CATSPER2, CACNG8, TRPM7, CLIC1, CACNA1C, TMCO1	1047	359	20581	0.438042	1	0.999998	100
Annotation Cluster 113	Enrichment Score: 0.25754611039167974
Category	Term	Count	%	PValue	Genes	List Total	Pop Hits	Pop Total	Fold Enrichment	Bonferroni	Benjamini	FDR
UP_SEQ_FEATURE	domain:Tyrosine-protein phosphatase 2	3	0.280374	0.124836	PTPRD, PTPRG, PTPRA	1037	12	20063	4.83679	1	0.97947	91.1611
UP_SEQ_FEATURE	domain:Tyrosine-protein phosphatase 1	3	0.280374	0.124836	PTPRD, PTPRG, PTPRA	1037	12	20063	4.83679	1	0.97947	91.1611
GOTERM_MF_DIRECT	GO:0005001~transmembrane receptor protein tyrosine phosphatase activity	3	0.280374	0.25534	PTPRD, PTPRG, PTPRA	971	17	16881	3.06797	1	0.910579	98.9963
INTERPRO	IPR000242:Protein-tyrosine phosphatase, receptor/non-receptor type	3	0.280374	0.620176	PTPRD, PTPRG, PTPRA	1011	38	18559	1.44924	1	0.999996	100
SMART	SM00194:PTPc	3	0.280374	0.659511	PTPRD, PTPRG, PTPRA	604	37	10057	1.35005	1	0.999033	100
UP_KEYWORDS	Protein phosphatase	6	0.560748	0.812033	EYA4, PTPRD, RPAP2, PTPRG, PTPRA, DUSP6	1047	133	20581	0.886787	1	0.980601	100
GOTERM_BP_DIRECT	GO:0035335~peptidyl-tyrosine dephosphorylation	5	0.46729	0.825375	EYA4, PTPRD, PTPRG, PTPRA, DUSP6	962	99	16792	0.881581	1	0.999999	100
UP_SEQ_FEATURE	active site:Phosphocysteine intermediate	4	0.373832	0.827707	PTPRD, PTPRG, PTPRA, DUSP6	1037	86	20063	0.899868	1	1	100
INTERPRO	IPR000387:Protein-tyrosine/Dual specificity phosphatase	4	0.373832	0.830615	PTPRD, PTPRG, PTPRA, DUSP6	1011	82	18559	0.895467	1	1	100
GOTERM_MF_DIRECT	GO:0004725~protein tyrosine phosphatase activity	5	0.46729	0.833607	EYA4, PTPRD, PTPRG, PTPRA, DUSP6	971	100	16881	0.869258	1	0.999812	100
INTERPRO	IPR003595:Protein-tyrosine phosphatase, catalytic	3	0.280374	0.864256	PTPRD, PTPRG, PTPRA	1011	63	18559	0.874146	1	1	100
SMART	SM00404:PTPc_motif	3	0.280374	0.898676	PTPRD, PTPRG, PTPRA	604	63	10057	0.792889	1	0.999993	100
INTERPRO	IPR016130:Protein-tyrosine phosphatase, active site	3	0.280374	0.923968	PTPRD, PTPRG, PTPRA	1011	76	18559	0.724621	1	1	100
Annotation Cluster 114	Enrichment Score: 0.24383473754282523
Category	Term	Count	%	PValue	Genes	List Total	Pop Hits	Pop Total	Fold Enrichment	Bonferroni	Benjamini	FDR
GOTERM_BP_DIRECT	GO:0018105~peptidyl-serine phosphorylation	11	1.02804	0.178826	CSNK1A1, TAF1, PLK2, PKN2, SMG1, PRKDC, RICTOR, STK4, PRKD3, ATM, AKT2	962	125	16792	1.53607	1	0.959542	97.2125
UP_KEYWORDS	Serine/threonine-protein kinase	23	2.14953	0.349518	CSNK1A1, TAF1, PRPF4B, TRPM7, TAOK1, PKN2, SMG1, PRKDC, MARK3, PRKG1, STK4, ATM, GAK, MAP4K4, MAP3K4, PLK2, AAK1, PRKAA2, IKBKB, MAP2K7, PRKD3, AKT2, CDK13	1047	393	20581	1.15042	1	0.791619	99.7688
GOTERM_BP_DIRECT	GO:0006468~protein phosphorylation	28	2.61682	0.458005	CCNT2, FGFR1, CCL2, PRPF4B, PHKB, PTK7, PRKG1, TRIB2, APP, AAK1, PRKAA2, PIK3R1, CSNK1A1, TAF1, ADAM10, TAOK1, SMAD5, PKN2, BIRC6, ILF3, STK4, GTF2H2, ATM, GAK, MAP4K4, PLK2, IKBKB, PRKD3	962	456	16792	1.07182	1	0.998584	99.9985
UP_KEYWORDS	Kinase	39	3.64486	0.493653	FGFR1, PRPF4B, PHKB, PPIP5K2, PRKDC, AKAP9, PRKG1, PRKCSH, DDR2, PKM, MAP3K4, AAK1, PRKAA2, MAP2K7, PIK3R1, CDK13, AKT2, CSNK1A1, EGFR, TAF1, TRPM7, TAOK1, PKN2, SMG1, MARK3, KIDINS220, STK4, ATM, GAK, MAP4K4, PNKP, EPHA4, BAZ1B, PLK2, HGS, PGK1, IKBKB, PRKD3, CALM2	1047	735	20581	1.04303	1	0.875062	99.9933
GOTERM_MF_DIRECT	GO:0004672~protein kinase activity	22	2.05607	0.498499	CSNK1A1, EGFR, CCL2, PRPF4B, TAOK1, PKN2, PTK7, SMG1, PRKDC, STK4, GTF2H2, TRIB2, GAK, EPHA4, MAP4K4, MAP3K4, AAK1, PRKAA2, IKBKB, MAP2K7, AKT2, CDK13	971	359	16881	1.06539	1	0.987178	99.9979
INTERPRO	IPR008271:Serine/threonine-protein kinase, active site	17	1.58879	0.633258	CSNK1A1, PRPF4B, TAOK1, PKN2, MARK3, PRKG1, GAK, MAP4K4, MAP3K4, PLK2, AAK1, PRKAA2, IKBKB, MAP2K7, PRKD3, AKT2, CDK13	1011	312	18559	1.00023	1	0.999997	100
UP_SEQ_FEATURE	binding site:ATP	28	2.61682	0.665178	FGFR1, SPG7, PRPF4B, PRKG1, DDR2, IARS, MAP3K4, AAK1, LARS, PRKAA2, MAP2K7, CDK13, MARS, AKT2, CSNK1A1, EGFR, TAOK1, TRPM7, PKN2, MARK3, STK4, EPHA4, MAP4K4, HSP90B1, PLK2, IKBKB, PGK1, PRKD3	1037	558	20063	0.970825	1	1	100
INTERPRO	IPR011009:Protein kinase-like domain	28	2.61682	0.671369	FGFR1, PRPF4B, PTK7, PRKDC, PRKG1, DDR2, TRIB2, MAP3K4, AAK1, PRKAA2, MAP2K7, AKT2, CDK13, CSNK1A1, EGFR, TRPM7, TAOK1, PKN2, SMG1, MARK3, STK4, ATM, GAK, EPHA4, MAP4K4, PLK2, IKBKB, PRKD3	1011	531	18559	0.967981	1	0.999999	100
GOTERM_MF_DIRECT	GO:0004674~protein serine/threonine kinase activity	21	1.96262	0.67247	CSNK1A1, CCNT2, TAF1, PRPF4B, TRPM7, TAOK1, PKN2, SMG1, PRKDC, MARK3, PRKG1, STK4, ATM, GAK, MAP4K4, PLK2, AAK1, PRKAA2, IKBKB, AKT2, CDK13	971	376	16881	0.97098	1	0.99735	100
UP_SEQ_FEATURE	active site:Proton acceptor	33	3.08411	0.708995	ALDOA, FGFR1, LDHA, PXDN, PRPF4B, PRKG1, DDR2, TPI1, MAP3K4, AAK1, EXOG, PRKAA2, MAP2K7, CDK13, ENO1, AKT2, CSNK1A1, EGFR, TAOK1, TRPM7, PKN2, SIRT7, MARK3, STK4, GAK, ACADVL, EPHA4, RDH11, MAP4K4, PLK2, IKBKB, PRKD3, PMPCB	1037	672	20063	0.950084	1	1	100
UP_SEQ_FEATURE	domain:Protein kinase	23	2.14953	0.74184	CSNK1A1, EGFR, FGFR1, PRPF4B, TAOK1, PKN2, MARK3, PRKG1, STK4, DDR2, TRIB2, GAK, EPHA4, MAP4K4, MAP3K4, PLK2, AAK1, PRKAA2, IKBKB, MAP2K7, PRKD3, AKT2, CDK13	1037	478	20063	0.93093	1	1	100
SMART	SM00220:S_TKc	20	1.86916	0.748007	CSNK1A1, PRPF4B, TAOK1, PKN2, PRKG1, MARK3, STK4, TRIB2, GAK, EPHA4, MAP4K4, MAP3K4, PLK2, AAK1, PRKAA2, IKBKB, MAP2K7, PRKD3, AKT2, CDK13	604	359	10057	0.927613	1	0.99976	100
INTERPRO	IPR000719:Protein kinase, catalytic domain	24	2.24299	0.788377	CSNK1A1, EGFR, FGFR1, PRPF4B, TAOK1, PTK7, PKN2, MARK3, PRKG1, STK4, DDR2, TRIB2, GAK, EPHA4, MAP4K4, MAP3K4, PLK2, AAK1, PRKAA2, IKBKB, MAP2K7, PRKD3, AKT2, CDK13	1011	487	18559	0.904661	1	1	100
INTERPRO	IPR017441:Protein kinase, ATP binding site	16	1.49533	0.928349	CSNK1A1, EGFR, FGFR1, TAOK1, PKN2, MARK3, PRKG1, STK4, EPHA4, MAP4K4, MAP3K4, PLK2, PRKAA2, PRKD3, AKT2, CDK13	1011	381	18559	0.770901	1	1	100
Annotation Cluster 115	Enrichment Score: 0.24327647460647756
Category	Term	Count	%	PValue	Genes	List Total	Pop Hits	Pop Total	Fold Enrichment	Bonferroni	Benjamini	FDR
UP_SEQ_FEATURE	domain:Fibronectin type-III 7	3	0.280374	0.372721	PTPRD, COL14A1, FN1	1037	25	20063	2.32166	1	0.999953	99.9793
UP_SEQ_FEATURE	domain:Fibronectin type-III 8	3	0.280374	0.372721	PTPRD, COL14A1, FN1	1037	25	20063	2.32166	1	0.999953	99.9793
UP_SEQ_FEATURE	domain:Fibronectin type-III 5	4	0.373832	0.426519	NRCAM, PTPRD, COL14A1, FN1	1037	46	20063	1.68236	1	0.999989	99.996
UP_SEQ_FEATURE	domain:Fibronectin type-III 6	3	0.280374	0.497458	PTPRD, COL14A1, FN1	1037	32	20063	1.8138	1	0.999998	99.9996
UP_SEQ_FEATURE	domain:Fibronectin type-III 3	5	0.46729	0.636362	NRCAM, PTPRD, COL14A1, BOC, FN1	1037	84	20063	1.15162	1	1	100
UP_SEQ_FEATURE	domain:Fibronectin type-III 4	4	0.373832	0.638274	NRCAM, PTPRD, COL14A1, FN1	1037	63	20063	1.22839	1	1	100
UP_SEQ_FEATURE	domain:Fibronectin type-III 2	7	0.654206	0.689475	NCAM1, NRCAM, EPHA4, PTPRD, COL14A1, BOC, FN1	1037	133	20063	1.01827	1	1	100
UP_SEQ_FEATURE	domain:Fibronectin type-III 1	7	0.654206	0.696372	NCAM1, NRCAM, EPHA4, PTPRD, COL14A1, BOC, FN1	1037	134	20063	1.01067	1	1	100
INTERPRO	IPR003961:Fibronectin, type III	10	0.934579	0.799715	NCAM1, NRCAM, EPHA4, PTPRD, COL14A1, PTPRG, COL6A3, LRFN5, BOC, FN1	1011	207	18559	0.886815	1	1	100
SMART	SM00060:FN3	8	0.747664	0.803091	NCAM1, NRCAM, EPHA4, PTPRD, COL14A1, PTPRG, BOC, FN1	604	150	10057	0.888035	1	0.999927	100
Annotation Cluster 116	Enrichment Score: 0.2407105376842841
Category	Term	Count	%	PValue	Genes	List Total	Pop Hits	Pop Total	Fold Enrichment	Bonferroni	Benjamini	FDR
KEGG_PATHWAY	hsa05215:Prostate cancer	12	1.1215	0.0326893	EGFR, FGFR1, HSP90B1, HSP90AA1, NFKBIA, CREB5, PDGFC, IKBKB, TCF7L2, TCF7L1, PIK3R1, AKT2	463	88	6879	2.02602	0.999754	0.447604	35.0635
KEGG_PATHWAY	hsa05222:Small cell lung cancer	10	0.934579	0.115374	LAMA4, CYCS, CKS2, NFKBIA, IKBKB, LAMB1, ITGB1, PIK3R1, AKT2, FN1	463	85	6879	1.74794	1	0.736185	79.6597
KEGG_PATHWAY	hsa04668:TNF signaling pathway	11	1.02804	0.180439	CFLAR, CCL2, CEBPB, ATF6B, NFKBIA, CREB5, MMP14, IKBKB, MAP2K7, PIK3R1, AKT2	463	107	6879	1.5274	1	0.830798	92.4605
KEGG_PATHWAY	hsa04150:mTOR signaling pathway	7	0.654206	0.191972	TSC2, RICTOR, PRKAA2, IKBKB, RPS6, PIK3R1, AKT2	463	58	6879	1.79314	1	0.840797	93.7284
KEGG_PATHWAY	hsa04210:Apoptosis	7	0.654206	0.235449	CFLAR, CYCS, NFKBIA, IKBKB, PIK3R1, ATM, AKT2	463	62	6879	1.67745	1	0.877224	96.9427
BIOCARTA	h_aktPathway:AKT Signaling Pathway	4	0.373832	0.270282	HSP90AA1, NFKBIA, IKBKB, PIK3R1	135	22	1625	2.18855	1	0.982283	98.0218
KEGG_PATHWAY	hsa05221:Acute myeloid leukemia	6	0.560748	0.322612	RUNX1T1, IKBKB, TCF7L2, TCF7L1, PIK3R1, AKT2	463	56	6879	1.59187	1	0.922894	99.3655
KEGG_PATHWAY	hsa05164:Influenza A	13	1.21495	0.505815	ACTB, PABPN1, XPO1, CCL2, CYCS, DDX39B, NFKBIA, ACTG1, IKBKB, MAP2K7, PIK3R1, ADAR, AKT2	463	174	6879	1.11004	1	0.957003	99.9894
KEGG_PATHWAY	hsa05220:Chronic myeloid leukemia	6	0.560748	0.536227	CTBP2, NFKBIA, MECOM, IKBKB, PIK3R1, AKT2	463	72	6879	1.23812	1	0.959299	99.9954
KEGG_PATHWAY	hsa05169:Epstein-Barr virus infection	9	0.841121	0.580817	VIM, HLA-A, NFKBIA, HLA-B, RBPJ, IKBKB, MAP2K7, PIK3R1, AKT2	463	122	6879	1.09604	1	0.96826	99.9988
KEGG_PATHWAY	hsa04931:Insulin resistance	8	0.747664	0.59498	MGEA5, NFKBIA, CREB5, PRKAA2, OGT, IKBKB, PIK3R1, AKT2	463	108	6879	1.10055	1	0.967404	99.9992
BIOCARTA	h_raccycdPathway:Influence of Ras and Rho proteins on G1 to S Transition	3	0.280374	0.666873	NFKBIA, IKBKB, PIK3R1	135	27	1625	1.33745	1	0.999467	99.9999
KEGG_PATHWAY	hsa04722:Neurotrophin signaling pathway	8	0.747664	0.704615	NFKBIA, KIDINS220, IKBKB, MAP2K7, YWHAE, PIK3R1, CALM2, AKT2	463	120	6879	0.990497	1	0.975715	100
KEGG_PATHWAY	hsa05142:Chagas disease (American trypanosomiasis)	7	0.654206	0.708124	CFLAR, CCL2, NFKBIA, CALR, IKBKB, PIK3R1, AKT2	463	104	6879	1.00002	1	0.975501	100
KEGG_PATHWAY	hsa05145:Toxoplasmosis	7	0.654206	0.757618	LAMA4, CYCS, NFKBIA, IKBKB, LAMB1, ITGB1, AKT2	463	110	6879	0.945474	1	0.981333	100
BIOCARTA	h_keratinocytePathway:Keratinocyte Differentiation	4	0.373832	0.77251	EGFR, NFKBIA, IKBKB, MAP2K7	135	48	1625	1.00309	1	0.999923	100
KEGG_PATHWAY	hsa05160:Hepatitis C	8	0.747664	0.799082	EGFR, EIF3E, NFKBIA, PIAS1, IKBKB, PIK3R1, CLDN15, AKT2	463	133	6879	0.893681	1	0.983328	100
KEGG_PATHWAY	hsa04660:T cell receptor signaling pathway	6	0.560748	0.811135	NFKBIA, IKBKB, MAP2K7, PIK3R1, AKT2, DLG1	463	100	6879	0.891447	1	0.983179	100
KEGG_PATHWAY	hsa05212:Pancreatic cancer	4	0.373832	0.821897	EGFR, IKBKB, PIK3R1, AKT2	463	65	6879	0.914305	1	0.983561	100
KEGG_PATHWAY	hsa04064:NF-kappa B signaling pathway	5	0.46729	0.845347	CFLAR, NFKBIA, PIDD1, IKBKB, ATM	463	87	6879	0.853877	1	0.985624	100
BIOCARTA	h_fcer1Pathway:Fc Epsilon Receptor I Signaling in Mast Cells	3	0.280374	0.846292	MAP2K7, PIK3R1, CALM2	135	39	1625	0.925926	1	0.999981	100
KEGG_PATHWAY	hsa04662:B cell receptor signaling pathway	4	0.373832	0.851719	NFKBIA, IKBKB, PIK3R1, AKT2	463	69	6879	0.861302	1	0.985883	100
KEGG_PATHWAY	hsa04920:Adipocytokine signaling pathway	4	0.373832	0.85846	NFKBIA, PRKAA2, IKBKB, AKT2	463	70	6879	0.848997	1	0.986775	100
GOTERM_BP_DIRECT	GO:0038095~Fc-epsilon receptor signaling pathway	8	0.747664	0.889587	NFKBIA, UBB, IKBKB, MAP2K7, UBA52, RPS27A, PIK3R1, CALM2	962	178	16792	0.784508	1	1	100
BIOCARTA	h_tcrPathway:T Cell Receptor Signaling Pathway	3	0.280374	0.890987	NFKBIA, PIK3R1, CALM2	135	44	1625	0.820707	1	0.999996	100
GOTERM_BP_DIRECT	GO:0050852~T cell receptor signaling pathway	6	0.560748	0.930932	NFKBIA, UBB, IKBKB, UBA52, RPS27A, PIK3R1	962	148	16792	0.707647	1	1	100
KEGG_PATHWAY	hsa05161:Hepatitis B	7	0.654206	0.931304	CYCS, ATF6B, NFKBIA, CREB5, IKBKB, PIK3R1, AKT2	463	145	6879	0.717256	1	0.99548	100
KEGG_PATHWAY	hsa04620:Toll-like receptor signaling pathway	5	0.46729	0.932481	NFKBIA, IKBKB, MAP2K7, PIK3R1, AKT2	463	106	6879	0.700823	1	0.995441	100
KEGG_PATHWAY	hsa04012:ErbB signaling pathway	4	0.373832	0.9382	EGFR, MAP2K7, PIK3R1, AKT2	463	87	6879	0.683101	1	0.995648	100
BIOCARTA	h_mapkPathway:MAPKinase Signaling Pathway	5	0.46729	0.940014	MAP4K4, MAP3K4, NFKBIA, IKBKB, MAP2K7	135	87	1625	0.691784	1	1	100
KEGG_PATHWAY	hsa04380:Osteoclast differentiation	6	0.560748	0.945549	NFKBIA, FOSB, IKBKB, MAP2K7, PIK3R1, AKT2	463	131	6879	0.680494	1	0.996291	100
KEGG_PATHWAY	hsa04664:Fc epsilon RI signaling pathway	3	0.280374	0.948624	MAP2K7, PIK3R1, AKT2	463	68	6879	0.655476	1	0.996384	100
KEGG_PATHWAY	hsa05162:Measles	6	0.560748	0.950091	CCND2, CD46, NFKBIA, PIK3R1, AKT2, ADAR	463	133	6879	0.670261	1	0.996428	100
KEGG_PATHWAY	hsa04062:Chemokine signaling pathway	6	0.560748	0.996022	CCL2, NFKBIA, IKBKB, GNG5, PIK3R1, AKT2	463	186	6879	0.479273	1	0.99988	100
Annotation Cluster 117	Enrichment Score: 0.2401908522072887
Category	Term	Count	%	PValue	Genes	List Total	Pop Hits	Pop Total	Fold Enrichment	Bonferroni	Benjamini	FDR
UP_KEYWORDS	Mitochondrion	61	5.70093	0.359633	ATP5D, ATP5E, SPG7, ERCC6L2, COA1, BNIP3, PRDX5, SLIRP, COX5B, UQCRQ, C14ORF2, RPS3, UQCR11, VPS13C, DYNLL1, GPX4, EXOG, ATP5O, OGT, ATP5I, ATP5H, ATP5J, SLC25A6, CYCS, SECISBP2, NDUFA13, COX4I1, MRPS6, SYNJ2BP, ACADVL, KIF1B, UQCRH, SLC25A36, SLC25A37, LRPPRC, PMPCB, UQCRB, NDUFB4, COX7B, COX7C, CHCHD2, ATP5G2, SFXN5, TOMM7, COX6B1, FAM162A, MTERF4, ATP5J2, COX7A2, COX8A, SOD1, MON2, TTC19, SOD2…	1047	1119	20581	1.07157	1	0.797836	99.8146
UP_KEYWORDS	Transit peptide	26	2.42991	0.70059	ATP5D, COX7B, COX7C, PRDX5, ATP5G2, SLIRP, COX5B, GPX4, EXOG, ATP5O, MTERF4, ATP5J, COX7A2, COX8A, SECISBP2, COX4I1, SOD2, TTC19, ACADVL, IFI27, UQCRH, GLS, HIBCH, LRPPRC, METTL17, PMPCB	1047	536	20581	0.953517	1	0.954812	100
UP_SEQ_FEATURE	transit peptide:Mitochondrion	23	2.14953	0.755274	ATP5D, COX7A2, COX7B, COX8A, COX7C, CHCHD2, COX4I1, PRDX5, ATP5G2, SLIRP, COX5B, SOD2, ACADVL, UQCRH, GPX4, GLS, EXOG, ATP5O, HIBCH, LRPPRC, METTL17, PMPCB, ATP5J	1037	482	20063	0.923205	1	1	100
Annotation Cluster 118	Enrichment Score: 0.2264642613257193
Category	Term	Count	%	PValue	Genes	List Total	Pop Hits	Pop Total	Fold Enrichment	Bonferroni	Benjamini	FDR
UP_SEQ_FEATURE	domain:SH3	12	1.1215	0.294701	DBNL, SH3YL1, MIA3, PRMT2, MACF1, ABI2, AHI1, DOCK5, DST, PIK3R1, DLG1, SPTAN1	1037	175	20063	1.32666	1	0.99964	99.8257
UP_KEYWORDS	SH3 domain	12	1.1215	0.534859	DBNL, SH3YL1, MIA3, PRMT2, MACF1, ABI2, AHI1, DOCK5, DST, PIK3R1, DLG1, SPTAN1	1047	215	20581	1.09714	1	0.897231	99.998
INTERPRO	IPR001452:Src homology-3 domain	10	0.934579	0.844742	DBNL, SH3YL1, MIA3, PRMT2, ABI2, AHI1, DOCK5, PIK3R1, DLG1, SPTAN1	1011	218	18559	0.842068	1	1	100
SMART	SM00326:SH3	9	0.841121	0.932821	DBNL, SH3YL1, PRMT2, ABI2, AHI1, DOCK5, PIK3R1, DLG1, SPTAN1	604	206	10057	0.727456	1	0.999999	100
Annotation Cluster 119	Enrichment Score: 0.20986920173389842
Category	Term	Count	%	PValue	Genes	List Total	Pop Hits	Pop Total	Fold Enrichment	Bonferroni	Benjamini	FDR
KEGG_PATHWAY	hsa04142:Lysosome	10	0.934579	0.425742	LAMP1, LAPTM4A, PSAP, HEXA, IGF2R, CTSD, PPT1, CD164, CD63, GGA1	463	121	6879	1.22789	1	0.957215	99.9258
GOTERM_CC_DIRECT	GO:0005764~lysosome	12	1.1215	0.700234	LAMP1, PSAP, TIAL1, TSC2, GJA1, CTSD, PPT1, AP5M1, CD164, CD63, SOD1, FLCN	1000	226	18224	0.967646	1	0.988586	100
UP_KEYWORDS	Lysosome	12	1.1215	0.78705	LAMP1, PSAP, HEXA, IGF2R, IFITM3, SPPL2B, SPPL2A, CTSD, PPT1, AP5M1, CD164, CD63	1047	263	20581	0.896903	1	0.975989	100
Annotation Cluster 120	Enrichment Score: 0.20069135165352198
Category	Term	Count	%	PValue	Genes	List Total	Pop Hits	Pop Total	Fold Enrichment	Bonferroni	Benjamini	FDR
UP_KEYWORDS	Host cell receptor for virus entry	5	0.46729	0.410699	NCAM1, RPSA, LAMP1, CD46, ITGB1	1047	64	20581	1.53571	1	0.824249	99.9426
GOTERM_MF_DIRECT	GO:0001618~virus receptor activity	5	0.46729	0.577162	NCAM1, RPSA, LAMP1, CD46, ITGB1	971	70	16881	1.2418	1	0.993578	99.9999
GOTERM_BP_DIRECT	GO:0046718~viral entry into host cell	5	0.46729	0.679012	NCAM1, RPSA, LAMP1, CD46, ITGB1	962	80	16792	1.09096	1	0.999957	100
GOTERM_CC_DIRECT	GO:0009897~external side of plasma membrane	7	0.654206	0.978444	NCAM1, NRCAM, P4HB, LAMP1, CALR, ITGB1, B2M	1000	213	18224	0.598911	1	0.999995	100
Annotation Cluster 121	Enrichment Score: 0.19697612978426476
Category	Term	Count	%	PValue	Genes	List Total	Pop Hits	Pop Total	Fold Enrichment	Bonferroni	Benjamini	FDR
GOTERM_MF_DIRECT	GO:0019905~syntaxin binding	6	0.560748	0.45606	STX16, SEC22B, TMED10, VAMP2, TMED9, GOLGA2	971	77	16881	1.35469	1	0.980815	99.9925
GOTERM_MF_DIRECT	GO:0005484~SNAP receptor activity	3	0.280374	0.66438	STX16, SEC22B, VAMP2	971	39	16881	1.33732	1	0.997184	100
KEGG_PATHWAY	hsa04130:SNARE interactions in vesicular transport	3	0.280374	0.676397	STX16, SEC22B, VAMP2	463	34	6879	1.31095	1	0.971855	100
GOTERM_CC_DIRECT	GO:0031201~SNARE complex	3	0.280374	0.795162	STX16, SEC22B, VAMP2	1000	53	18224	1.03155	1	0.99611	100
Annotation Cluster 122	Enrichment Score: 0.19540055024213743
Category	Term	Count	%	PValue	Genes	List Total	Pop Hits	Pop Total	Fold Enrichment	Bonferroni	Benjamini	FDR
UP_KEYWORDS	Mitogen	4	0.373832	0.33241	PTN, PDGFC, MDK, YBX1	1047	40	20581	1.96571	1	0.776624	99.6664
GOTERM_BP_DIRECT	GO:0051781~positive regulation of cell division	4	0.373832	0.509091	PTN, PDGFC, MDK, YBX1	962	47	16792	1.48556	1	0.999314	99.9998
GOTERM_MF_DIRECT	GO:0008083~growth factor activity	5	0.46729	0.985449	CTGF, GRN, PTN, PDGFC, MDK	971	162	16881	0.536579	1	1	100
UP_KEYWORDS	Growth factor	3	0.280374	0.991504	PTN, PDGFC, MDK	1047	131	20581	0.450163	1	0.999899	100
Annotation Cluster 123	Enrichment Score: 0.18202182088781876
Category	Term	Count	%	PValue	Genes	List Total	Pop Hits	Pop Total	Fold Enrichment	Bonferroni	Benjamini	FDR
GOTERM_BP_DIRECT	GO:0048010~vascular endothelial growth factor receptor signaling pathway	6	0.560748	0.395372	ACTB, ACTG1, HSP90AA1, CCL2, SULF1, PIK3R1	962	72	16792	1.45461	1	0.997182	99.9893
KEGG_PATHWAY	hsa05100:Bacterial invasion of epithelial cells	6	0.560748	0.608671	ACTB, ACTG1, CAV1, ITGB1, PIK3R1, FN1	463	78	6879	1.14288	1	0.966603	99.9995
KEGG_PATHWAY	hsa04670:Leukocyte transendothelial migration	7	0.654206	0.793948	ACTB, ACTG1, ARHGAP5, ARHGAP35, ITGB1, PIK3R1, CLDN15	463	115	6879	0.904367	1	0.984344	100
GOTERM_BP_DIRECT	GO:0038096~Fc-gamma receptor signaling pathway involved in phagocytosis	4	0.373832	0.978885	ACTB, ACTG1, HSP90AA1, PIK3R1	962	127	16792	0.549773	1	1	100
Annotation Cluster 124	Enrichment Score: 0.17913524657808882
Category	Term	Count	%	PValue	Genes	List Total	Pop Hits	Pop Total	Fold Enrichment	Bonferroni	Benjamini	FDR
SMART	SM00280:KAZAL	3	0.280374	0.61331	FSTL1, SPOCK1, SPARC	604	34	10057	1.46918	1	0.998216	99.9998
UP_SEQ_FEATURE	domain:Kazal-like	3	0.280374	0.619095	FSTL1, SPOCK1, SPARC	1037	40	20063	1.45104	1	1	100
INTERPRO	IPR002350:Kazal domain	3	0.280374	0.764111	FSTL1, SPOCK1, SPARC	1011	50	18559	1.10142	1	1	100
Annotation Cluster 125	Enrichment Score: 0.17870061102075802
Category	Term	Count	%	PValue	Genes	List Total	Pop Hits	Pop Total	Fold Enrichment	Bonferroni	Benjamini	FDR
KEGG_PATHWAY	hsa04146:Peroxisome	7	0.654206	0.487715	GSTK1, PEX26, PRDX5, ABCD4, SOD1, PRDX1, SOD2	463	83	6879	1.25304	1	0.957364	99.9832
GOTERM_CC_DIRECT	GO:0005777~peroxisome	6	0.560748	0.680715	GSTK1, PEX26, VIM, PRDX5, ABCD4, SOD1	1000	104	18224	1.05138	1	0.986241	100
UP_KEYWORDS	Peroxisome	4	0.373832	0.876531	GSTK1, PEX26, PRDX5, ABCD4	1047	97	20581	0.810603	1	0.990716	100
Annotation Cluster 126	Enrichment Score: 0.16601542134962174
Category	Term	Count	%	PValue	Genes	List Total	Pop Hits	Pop Total	Fold Enrichment	Bonferroni	Benjamini	FDR
KEGG_PATHWAY	hsa04621:NOD-like receptor signaling pathway	6	0.560748	0.322612	HSP90AA1, CCL2, NFKBIA, NAIP, IKBKB, NLRP1	463	56	6879	1.59187	1	0.922894	99.3655
UP_KEYWORDS	Inflammatory response	4	0.373832	0.985108	CCL2, NAIP, NLRP1, MIF	1047	152	20581	0.517293	1	0.999742	100
GOTERM_BP_DIRECT	GO:0006954~inflammatory response	10	0.934579	0.999515	CCL2, CEBPB, LTB4R, PRDX5, NAIP, IKBKB, HDAC9, NLRP1, IGFBP4, MIF	962	379	16792	0.460562	1	1	100
Annotation Cluster 127	Enrichment Score: 0.16588323110741388
Category	Term	Count	%	PValue	Genes	List Total	Pop Hits	Pop Total	Fold Enrichment	Bonferroni	Benjamini	FDR
KEGG_PATHWAY	hsa05230:Central carbon metabolism in cancer	7	0.654206	0.258242	PKM, EGFR, FGFR1, GLS, PGAM1, PIK3R1, AKT2	463	64	6879	1.62503	1	0.895975	97.9366
KEGG_PATHWAY	hsa05213:Endometrial cancer	5	0.46729	0.465761	EGFR, TCF7L2, TCF7L1, PIK3R1, AKT2	463	52	6879	1.4286	1	0.959178	99.971
KEGG_PATHWAY	hsa04066:HIF-1 signaling pathway	8	0.747664	0.468062	EGFR, TCEB2, ANGPT1, RPS6, GAPDH, PIK3R1, AKT2, ENO1	463	96	6879	1.23812	1	0.95741	99.9725
KEGG_PATHWAY	hsa05223:Non-small cell lung cancer	5	0.46729	0.524577	EGFR, STK4, PIK3R1, EML4, AKT2	463	56	6879	1.32656	1	0.957175	99.9936
KEGG_PATHWAY	hsa05218:Melanoma	5	0.46729	0.711772	EGFR, FGFR1, PDGFC, PIK3R1, AKT2	463	71	6879	1.0463	1	0.975335	100
GOTERM_BP_DIRECT	GO:0046854~phosphatidylinositol phosphorylation	5	0.46729	0.793407	EGFR, FGFR1, SMG1, PIK3R1, FAM126A	962	94	16792	0.928473	1	0.999998	100
KEGG_PATHWAY	hsa05214:Glioma	4	0.373832	0.821897	EGFR, PIK3R1, CALM2, AKT2	463	65	6879	0.914305	1	0.983561	100
KEGG_PATHWAY	hsa05212:Pancreatic cancer	4	0.373832	0.821897	EGFR, IKBKB, PIK3R1, AKT2	463	65	6879	0.914305	1	0.983561	100
GOTERM_BP_DIRECT	GO:0014066~regulation of phosphatidylinositol 3-kinase signaling	4	0.373832	0.831215	EGFR, IER3, FGFR1, PIK3R1	962	78	16792	0.895144	1	0.999999	100
GOTERM_MF_DIRECT	GO:0046934~phosphatidylinositol-4,5-bisphosphate 3-kinase activity	3	0.280374	0.878574	EGFR, FGFR1, PIK3R1	971	62	16881	0.841218	1	0.999946	100
KEGG_PATHWAY	hsa05231:Choline metabolism in cancer	5	0.46729	0.915352	EGFR, TSC2, PDGFC, PIK3R1, AKT2	463	101	6879	0.735517	1	0.993914	100
KEGG_PATHWAY	hsa04012:ErbB signaling pathway	4	0.373832	0.9382	EGFR, MAP2K7, PIK3R1, AKT2	463	87	6879	0.683101	1	0.995648	100
KEGG_PATHWAY	hsa04550:Signaling pathways regulating pluripotency of stem cells	5	0.46729	0.987114	FGFR1, RIF1, SMAD5, PIK3R1, AKT2	463	140	6879	0.530623	1	0.999389	100
Annotation Cluster 128	Enrichment Score: 0.1633371623722877
Category	Term	Count	%	PValue	Genes	List Total	Pop Hits	Pop Total	Fold Enrichment	Bonferroni	Benjamini	FDR
GOTERM_MF_DIRECT	GO:0070006~metalloaminopeptidase activity	3	0.280374	0.384196	LNPEP, NPEPPS, MMP14	971	23	16881	2.26763	1	0.967168	99.9483
GOTERM_BP_DIRECT	GO:0030307~positive regulation of cell growth	6	0.560748	0.529753	EGFR, ADAM10, NOL8, USP47, ADAM17, MMP14	962	84	16792	1.24681	1	0.999466	99.9999
UP_SEQ_FEATURE	metal ion-binding site:Zinc; in inhibited form	3	0.280374	0.545885	ADAM10, ADAM17, MMP14	1037	35	20063	1.65833	1	1	99.9999
UP_KEYWORDS	Metalloprotease	8	0.747664	0.658633	LNPEP, SPG7, ADAM10, ADAM17, NPEPPS, MMP14, MYSM1, PMPCB	1047	152	20581	1.03459	1	0.94283	100
UP_SEQ_FEATURE	metal ion-binding site:Zinc; catalytic	7	0.654206	0.66087	LNPEP, SPG7, ADAM10, ADAM17, NPEPPS, MMP14, MYSM1	1037	129	20063	1.04985	1	1	100
UP_SEQ_FEATURE	short sequence motif:Cysteine switch	3	0.280374	0.682868	ADAM10, ADAM17, MMP14	1037	45	20063	1.28981	1	1	100
GOTERM_MF_DIRECT	GO:0008237~metallopeptidase activity	5	0.46729	0.691535	LNPEP, ADAM10, ADAM17, NPEPPS, MYSM1	971	81	16881	1.07316	1	0.997929	100
GOTERM_MF_DIRECT	GO:0004222~metalloendopeptidase activity	6	0.560748	0.784722	SPG7, TSHZ2, ADAM10, ADAM17, MMP14, PMPCB	971	113	16881	0.923106	1	0.999514	100
INTERPRO	IPR024079:Metallopeptidase, catalytic domain	3	0.280374	0.939503	ADAM10, ADAM17, MMP14	1011	81	18559	0.679892	1	1	100
UP_KEYWORDS	Zymogen	7	0.654206	0.963864	ADAM10, HEXA, ADAM17, CTSD, PCSK7, MMP14, MBTPS1	1047	214	20581	0.64299	1	0.998734	100
UP_KEYWORDS	Cleavage on pair of basic residues	9	0.841121	0.984064	LECT1, ADAM10, ADAM17, ERV3-1, PDGFC, PCSK7, MMP14, ITM2B, CDH11	1047	294	20581	0.601748	1	0.999716	100
Annotation Cluster 129	Enrichment Score: 0.15272202836688756
Category	Term	Count	%	PValue	Genes	List Total	Pop Hits	Pop Total	Fold Enrichment	Bonferroni	Benjamini	FDR
INTERPRO	IPR027370:RING-type zinc-finger, LisH dimerisation motif	3	0.280374	0.605545	TRIM56, TRIM33, TRIM73	1011	37	18559	1.48841	1	0.999996	100
SMART	SM00336:BBOX	5	0.46729	0.655512	TRIM38, TRIM56, TRIM33, TRIM44, TRIM73	604	74	10057	1.12504	1	0.99907	100
INTERPRO	IPR000315:Zinc finger, B-box	5	0.46729	0.658887	TRIM38, TRIM56, TRIM33, TRIM44, TRIM73	1011	82	18559	1.11933	1	0.999999	100
UP_SEQ_FEATURE	zinc finger region:B box-type	4	0.373832	0.68908	TRIM38, TRIM44, MYCBP2, TRIM73	1037	68	20063	1.13807	1	1	100
INTERPRO	IPR017907:Zinc finger, RING-type, conserved site	6	0.560748	0.956273	TRIM38, TRIM56, SHPRH, SCAF11, TRIM33, TRIM73	1011	169	18559	0.65173	1	1	100
Annotation Cluster 130	Enrichment Score: 0.15109603022658244
Category	Term	Count	%	PValue	Genes	List Total	Pop Hits	Pop Total	Fold Enrichment	Bonferroni	Benjamini	FDR
UP_SEQ_FEATURE	repeat:Kelch 6	4	0.373832	0.507404	MKLN1, KLHL24, KLHDC2, KLHDC10	1037	52	20063	1.48824	1	0.999999	99.9997
UP_SEQ_FEATURE	repeat:Kelch 5	4	0.373832	0.669429	MKLN1, KLHL24, KLHDC2, KLHDC10	1037	66	20063	1.17255	1	1	100
UP_SEQ_FEATURE	repeat:Kelch 4	4	0.373832	0.707841	MKLN1, KLHL24, KLHDC2, KLHDC10	1037	70	20063	1.10555	1	1	100
UP_KEYWORDS	Kelch repeat	4	0.373832	0.715557	MKLN1, KLHL24, KLHDC2, KLHDC10	1047	72	20581	1.09206	1	0.959628	100
UP_SEQ_FEATURE	repeat:Kelch 2	4	0.373832	0.71689	MKLN1, KLHL24, KLHDC2, KLHDC10	1037	71	20063	1.08998	1	1	100
UP_SEQ_FEATURE	repeat:Kelch 3	4	0.373832	0.71689	MKLN1, KLHL24, KLHDC2, KLHDC10	1037	71	20063	1.08998	1	1	100
UP_SEQ_FEATURE	repeat:Kelch 1	4	0.373832	0.71689	MKLN1, KLHL24, KLHDC2, KLHDC10	1037	71	20063	1.08998	1	1	100
INTERPRO	IPR015915:Kelch-type beta propeller	3	0.280374	0.791751	MKLN1, KLHDC2, KLHDC10	1011	53	18559	1.03908	1	1	100
INTERPRO	IPR006652:Kelch repeat type 1	3	0.280374	0.870064	MKLN1, KLHL24, KLHDC10	1011	64	18559	0.860488	1	1	100
Annotation Cluster 131	Enrichment Score: 0.14867283004939214
Category	Term	Count	%	PValue	Genes	List Total	Pop Hits	Pop Total	Fold Enrichment	Bonferroni	Benjamini	FDR
KEGG_PATHWAY	hsa04015:Rap1 signaling pathway	14	1.30841	0.661974	ACTB, EGFR, FGFR1, ITGB1, ACTG1, PFN1, GRIN2B, KRIT1, ANGPT1, PDGFC, PIK3R1, CALM2, PRKD3, AKT2	463	210	6879	0.990497	1	0.970446	99.9999
KEGG_PATHWAY	hsa05218:Melanoma	5	0.46729	0.711772	EGFR, FGFR1, PDGFC, PIK3R1, AKT2	463	71	6879	1.0463	1	0.975335	100
KEGG_PATHWAY	hsa04014:Ras signaling pathway	14	1.30841	0.759976	EGFR, FGFR1, NF1, STK4, RGL2, GRIN2B, PLA2G12A, ANGPT1, PDGFC, IKBKB, GNG5, PIK3R1, CALM2, AKT2	463	226	6879	0.920373	1	0.981012	100
Annotation Cluster 132	Enrichment Score: 0.13963492321690116
Category	Term	Count	%	PValue	Genes	List Total	Pop Hits	Pop Total	Fold Enrichment	Bonferroni	Benjamini	FDR
GOTERM_BP_DIRECT	GO:0018108~peptidyl-tyrosine phosphorylation	10	0.934579	0.515267	EGFR, EPHA4, FGFR1, ZMYM2, HSP90AA1, BAZ1B, ABI2, CUX1, DDR2, MAP2K7	962	153	16792	1.14087	1	0.999354	99.9998
GOTERM_MF_DIRECT	GO:0004713~protein tyrosine kinase activity	8	0.747664	0.648351	EGFR, EPHA4, FGFR1, ZMYM2, HSP90AA1, BAZ1B, CUX1, MAP2K7	971	133	16881	1.04572	1	0.99695	100
GOTERM_BP_DIRECT	GO:0046777~protein autophosphorylation	10	0.934579	0.656713	EGFR, EPHA4, FGFR1, TAF1, TRPM7, AAK1, SMG1, DDR2, STK4, ATM	962	172	16792	1.01484	1	0.999932	100
UP_KEYWORDS	Tyrosine-protein kinase	6	0.560748	0.678837	EGFR, EPHA4, FGFR1, BAZ1B, DDR2, MAP2K7	1047	112	20581	1.05306	1	0.947751	100
INTERPRO	IPR008266:Tyrosine-protein kinase, active site	5	0.46729	0.766674	EGFR, EPHA4, FGFR1, PTK7, DDR2	1011	95	18559	0.966162	1	1	100
INTERPRO	IPR020635:Tyrosine-protein kinase, catalytic domain	4	0.373832	0.848316	EGFR, EPHA4, FGFR1, DDR2	1011	85	18559	0.863862	1	1	100
INTERPRO	IPR001245:Serine-threonine/tyrosine-protein kinase catalytic domain	6	0.560748	0.88418	EGFR, EPHA4, FGFR1, PTK7, DDR2, GAK	1011	140	18559	0.786732	1	1	100
SMART	SM00219:TyrKc	4	0.373832	0.89172	EGFR, EPHA4, FGFR1, DDR2	604	85	10057	0.783561	1	0.999991	100
Annotation Cluster 133	Enrichment Score: 0.13831901144074174
Category	Term	Count	%	PValue	Genes	List Total	Pop Hits	Pop Total	Fold Enrichment	Bonferroni	Benjamini	FDR
UP_KEYWORDS	Intermediate filament	5	0.46729	0.554527	KRT18, VIM, KRT10, DST, NEFL	1047	77	20581	1.27644	1	0.905136	99.9989
UP_SEQ_FEATURE	region of interest:Tail	5	0.46729	0.587765	KRT18, VIM, KRT10, MYO9A, NEFL	1037	79	20063	1.2245	1	1	100
INTERPRO	IPR018039:Intermediate filament protein, conserved site	4	0.373832	0.684183	KRT18, VIM, KRT10, NEFL	1011	64	18559	1.14732	1	0.999999	100
UP_SEQ_FEATURE	region of interest:Linker 12	4	0.373832	0.68908	KRT18, VIM, KRT10, NEFL	1037	68	20063	1.13807	1	1	100
UP_SEQ_FEATURE	region of interest:Linker 1	4	0.373832	0.742732	KRT18, VIM, KRT10, NEFL	1037	74	20063	1.04579	1	1	100
UP_SEQ_FEATURE	region of interest:Coil 1B	4	0.373832	0.742732	KRT18, VIM, KRT10, NEFL	1037	74	20063	1.04579	1	1	100
UP_SEQ_FEATURE	region of interest:Coil 1A	4	0.373832	0.742732	KRT18, VIM, KRT10, NEFL	1037	74	20063	1.04579	1	1	100
GOTERM_CC_DIRECT	GO:0005882~intermediate filament	6	0.560748	0.748704	KRT18, VIM, GJA1, KRT10, DST, PNN	1000	113	18224	0.967646	1	0.993375	100
UP_SEQ_FEATURE	region of interest:Rod	4	0.373832	0.750918	KRT18, VIM, KRT10, NEFL	1037	75	20063	1.03185	1	1	100
UP_SEQ_FEATURE	region of interest:Head	4	0.373832	0.76666	KRT18, VIM, KRT10, NEFL	1037	77	20063	1.00505	1	1	100
INTERPRO	IPR001664:Intermediate filament protein	4	0.373832	0.804279	KRT18, VIM, KRT10, NEFL	1011	78	18559	0.941388	1	1	100
SMART	SM01391:SM01391	4	0.373832	0.835703	KRT18, VIM, KRT10, NEFL	604	75	10057	0.888035	1	0.999954	100
UP_SEQ_FEATURE	region of interest:Coil 2	3	0.280374	0.872618	KRT18, VIM, KRT10	1037	68	20063	0.853551	1	1	100
Annotation Cluster 134	Enrichment Score: 0.13714937791352583
Category	Term	Count	%	PValue	Genes	List Total	Pop Hits	Pop Total	Fold Enrichment	Bonferroni	Benjamini	FDR
GOTERM_BP_DIRECT	GO:0007018~microtubule-based movement	6	0.560748	0.49719	AP2B1, DYNC1LI2, KIF1B, AP2S1, KTN1, DYNC1H1	962	81	16792	1.29299	1	0.999199	99.9996
UP_KEYWORDS	Motor protein	6	0.560748	0.822036	MYL6, DYNC1LI2, KIF1B, DYNLL1, DYNC1H1, MYO9A	1047	135	20581	0.87365	1	0.982186	100
GOTERM_MF_DIRECT	GO:0003777~microtubule motor activity	3	0.280374	0.948722	DYNC1LI2, KIF1B, DYNC1H1	971	80	16881	0.651944	1	0.999998	100
Annotation Cluster 135	Enrichment Score: 0.13519020223737338
Category	Term	Count	%	PValue	Genes	List Total	Pop Hits	Pop Total	Fold Enrichment	Bonferroni	Benjamini	FDR
UP_SEQ_FEATURE	repeat:2	15	1.40187	0.476175	TGOLN2, LGALS3, RRBP1, CALD1, BDP1, SRSF11, HNRNPR, RPL7, SRSF7, SFPQ, IGF2R, NDRG1, PIAS1, EPN1, EWSR1	1037	260	20063	1.11618	1	0.999998	99.9992
UP_SEQ_FEATURE	repeat:3	13	1.21495	0.496451	TGOLN2, LGALS3, RRBP1, CALD1, BDP1, SRSF11, RPL7, SRSF7, SFPQ, IGF2R, NDRG1, EPN1, EWSR1	1037	225	20063	1.11784	1	0.999999	99.9996
UP_SEQ_FEATURE	repeat:1	13	1.21495	0.68102	TGOLN2, LGALS3, RRBP1, CALD1, SRSF11, RPL7, SRSF7, SFPQ, IGF2R, NDRG1, PIAS1, EPN1, EWSR1	1037	257	20063	0.97865	1	1	100
UP_SEQ_FEATURE	repeat:7	7	0.654206	0.689475	TGOLN2, RRBP1, IGF2R, BDP1, SRSF11, EWSR1, EPN1	1037	133	20063	1.01827	1	1	100
UP_SEQ_FEATURE	repeat:5	8	0.747664	0.731353	TGOLN2, LGALS3, RRBP1, IGF2R, BDP1, SRSF11, EWSR1, EPN1	1037	161	20063	0.961349	1	1	100
UP_SEQ_FEATURE	repeat:10	5	0.46729	0.751507	TGOLN2, RRBP1, IGF2R, SRSF11, EWSR1	1037	98	20063	0.9871	1	1	100
UP_SEQ_FEATURE	repeat:8	6	0.560748	0.773508	TGOLN2, RRBP1, IGF2R, SRSF11, EWSR1, EPN1	1037	124	20063	0.936153	1	1	100
UP_SEQ_FEATURE	repeat:6	7	0.654206	0.776603	TGOLN2, RRBP1, IGF2R, BDP1, SRSF11, EWSR1, EPN1	1037	147	20063	0.921293	1	1	100
UP_SEQ_FEATURE	repeat:4	9	0.841121	0.780379	TGOLN2, SRSF7, RPL7, RRBP1, IGF2R, BDP1, SRSF11, EWSR1, EPN1	1037	192	20063	0.906898	1	1	100
UP_SEQ_FEATURE	repeat:14	4	0.373832	0.788744	TGOLN2, RRBP1, IGF2R, EWSR1	1037	80	20063	0.967358	1	1	100
UP_SEQ_FEATURE	repeat:9	5	0.46729	0.809339	TGOLN2, RRBP1, IGF2R, SRSF11, EWSR1	1037	107	20063	0.904073	1	1	100
UP_SEQ_FEATURE	repeat:13	4	0.373832	0.81546	TGOLN2, RRBP1, IGF2R, EWSR1	1037	84	20063	0.921293	1	1	100
UP_SEQ_FEATURE	repeat:12	4	0.373832	0.827707	TGOLN2, RRBP1, IGF2R, EWSR1	1037	86	20063	0.899868	1	1	100
UP_SEQ_FEATURE	repeat:11	4	0.373832	0.84477	TGOLN2, RRBP1, IGF2R, EWSR1	1037	89	20063	0.869535	1	1	100
UP_SEQ_FEATURE	repeat:15	3	0.280374	0.900972	RRBP1, IGF2R, EWSR1	1037	74	20063	0.784344	1	1	100
Annotation Cluster 136	Enrichment Score: 0.12965968886128837
Category	Term	Count	%	PValue	Genes	List Total	Pop Hits	Pop Total	Fold Enrichment	Bonferroni	Benjamini	FDR
INTERPRO	IPR008936:Rho GTPase activation protein	6	0.560748	0.556234	ARHGAP5, PLXNB2, NF1, ARHGAP35, MYO9A, PIK3R1	1011	91	18559	1.21036	1	0.999989	99.9999
UP_KEYWORDS	GTPase activation	10	0.934579	0.675554	RALGAPA1, RABGAP1, ARHGAP5, SGSM2, ACAP3, TSC2, ACAP2, NF1, ARHGAP35, MYO9A	1047	197	20581	0.997823	1	0.947289	100
UP_SEQ_FEATURE	domain:Rho-GAP	4	0.373832	0.68908	ARHGAP5, ARHGAP35, MYO9A, PIK3R1	1037	68	20063	1.13807	1	1	100
INTERPRO	IPR000198:Rho GTPase-activating protein domain	4	0.373832	0.713834	ARHGAP5, ARHGAP35, MYO9A, PIK3R1	1011	67	18559	1.09594	1	1	100
SMART	SM00324:RhoGAP	4	0.373832	0.756393	ARHGAP5, ARHGAP35, MYO9A, PIK3R1	604	65	10057	1.02466	1	0.999777	100
KEGG_PATHWAY	hsa04670:Leukocyte transendothelial migration	7	0.654206	0.793948	ACTB, ACTG1, ARHGAP5, ARHGAP35, ITGB1, PIK3R1, CLDN15	463	115	6879	0.904367	1	0.984344	100
GOTERM_BP_DIRECT	GO:0051056~regulation of small GTPase mediated signal transduction	6	0.560748	0.8879	RHOJ, RALGAPA1, ARHGAP5, TSC2, ARHGAP35, MYO9A	962	134	16792	0.781581	1	1	100
GOTERM_MF_DIRECT	GO:0005096~GTPase activator activity	12	1.1215	0.931179	RALGAPA1, RABGAP1, ARHGAP5, HACD3, SGSM2, ACAP3, TSC2, ACAP2, NF1, ARHGAP35, SH3BGRL3, MYO9A	971	279	16881	0.747749	1	0.999993	100
Annotation Cluster 137	Enrichment Score: 0.12752337989431384
Category	Term	Count	%	PValue	Genes	List Total	Pop Hits	Pop Total	Fold Enrichment	Bonferroni	Benjamini	FDR
KEGG_PATHWAY	hsa05031:Amphetamine addiction	6	0.560748	0.458262	GRIN2B, ATF6B, CREB5, FOSB, CACNA1C, CALM2	463	66	6879	1.35068	1	0.958934	99.9652
KEGG_PATHWAY	hsa04022:cGMP-PKG signaling pathway	11	1.02804	0.624554	ATP2B1, GTF2I, SLC25A6, ATF6B, PPP1R12A, CREB5, ATP1A1, PRKG1, CACNA1C, CALM2, AKT2	463	158	6879	1.03438	1	0.966678	99.9997
KEGG_PATHWAY	hsa04911:Insulin secretion	6	0.560748	0.684336	ATF6B, CREB5, ATP1A1, VAMP2, CACNA1C, PCLO	463	85	6879	1.04876	1	0.972768	100
KEGG_PATHWAY	hsa04261:Adrenergic signaling in cardiomyocytes	9	0.841121	0.717774	ATP2B1, CACNG8, ATF6B, CREB5, ATP1A1, CACNA1C, TPM1, CALM2, AKT2	463	138	6879	0.968964	1	0.974713	100
KEGG_PATHWAY	hsa04925:Aldosterone synthesis and secretion	5	0.46729	0.802871	ATF6B, CREB5, CACNA1C, PRKD3, CALM2	463	81	6879	0.917127	1	0.98344	100
KEGG_PATHWAY	hsa04024:cAMP signaling pathway	11	1.02804	0.865545	ATP2B1, GRIN2B, PPP1R12A, NFKBIA, CREB5, ATP1A1, CACNA1C, GLI3, PIK3R1, CALM2, AKT2	463	198	6879	0.825414	1	0.987726	100
KEGG_PATHWAY	hsa04728:Dopaminergic synapse	7	0.654206	0.868819	GRIN2B, ATF6B, CREB5, CACNA1C, GNG5, CALM2, AKT2	463	128	6879	0.812517	1	0.987444	100
KEGG_PATHWAY	hsa04713:Circadian entrainment	5	0.46729	0.889768	GRIN2B, PRKG1, CACNA1C, GNG5, CALM2	463	95	6879	0.781971	1	0.990646	100
KEGG_PATHWAY	hsa04720:Long-term potentiation	3	0.280374	0.942338	GRIN2B, CACNA1C, CALM2	463	66	6879	0.675339	1	0.996032	100
Annotation Cluster 138	Enrichment Score: 0.12142562314535821
Category	Term	Count	%	PValue	Genes	List Total	Pop Hits	Pop Total	Fold Enrichment	Bonferroni	Benjamini	FDR
UP_SEQ_FEATURE	domain:SAM	5	0.46729	0.626946	EPHA4, ANKS3, CNKSR3, STIM2, SAMD4A	1037	83	20063	1.16549	1	1	100
INTERPRO	IPR001660:Sterile alpha motif domain	5	0.46729	0.75944	EPHA4, ANKS3, CNKSR3, STIM2, SAMD4A	1011	94	18559	0.97644	1	1	100
INTERPRO	IPR013761:Sterile alpha motif/pointed domain	6	0.560748	0.769742	EPHA4, ANKS3, CNKSR3, STIM2, KIDINS220, SAMD4A	1011	117	18559	0.941388	1	1	100
SMART	SM00454:SAM	4	0.373832	0.89172	EPHA4, ANKS3, CNKSR3, SAMD4A	604	85	10057	0.783561	1	0.999991	100
Annotation Cluster 139	Enrichment Score: 0.11816976000560742
Category	Term	Count	%	PValue	Genes	List Total	Pop Hits	Pop Total	Fold Enrichment	Bonferroni	Benjamini	FDR
UP_KEYWORDS	LIM domain	4	0.373832	0.715557	LPP, LIMCH1, LMO4, PDLIM4	1047	72	20581	1.09206	1	0.959628	100
INTERPRO	IPR001781:Zinc finger, LIM-type	4	0.373832	0.758398	LPP, LIMCH1, LMO4, PDLIM4	1011	72	18559	1.01984	1	1	100
SMART	SM00132:LIM	4	0.373832	0.814609	LPP, LIMCH1, LMO4, PDLIM4	604	72	10057	0.925037	1	0.999932	100
Annotation Cluster 140	Enrichment Score: 0.11542361333979886
Category	Term	Count	%	PValue	Genes	List Total	Pop Hits	Pop Total	Fold Enrichment	Bonferroni	Benjamini	FDR
GOTERM_MF_DIRECT	GO:0008013~beta-catenin binding	5	0.46729	0.700754	TBL1XR1, GLI3, TCF7L2, TCF7L1, CALCOCO1	971	82	16881	1.06007	1	0.998033	100
GOTERM_BP_DIRECT	GO:0060070~canonical Wnt signaling pathway	5	0.46729	0.706753	TBL1XR1, PTK7, SOX4, TCF7L2, TCF7L1	962	83	16792	1.05152	1	0.999976	100
KEGG_PATHWAY	hsa04310:Wnt signaling pathway	7	0.654206	0.909696	CSNK1A1, TBL1XR1, CTBP2, CCND2, DAAM1, TCF7L2, TCF7L1	463	138	6879	0.753639	1	0.993326	100
Annotation Cluster 141	Enrichment Score: 0.1126837803639522
Category	Term	Count	%	PValue	Genes	List Total	Pop Hits	Pop Total	Fold Enrichment	Bonferroni	Benjamini	FDR
UP_SEQ_FEATURE	domain:FERM	3	0.280374	0.727362	FRMD4A, KRIT1, FRMD4B	1037	49	20063	1.18452	1	1	100
INTERPRO	IPR014352:FERM/acyl-CoA-binding protein, 3-helical bundle	3	0.280374	0.764111	FRMD4A, KRIT1, FRMD4B	1011	50	18559	1.10142	1	1	100
INTERPRO	IPR000299:FERM domain	3	0.280374	0.773661	FRMD4A, KRIT1, FRMD4B	1011	51	18559	1.07983	1	1	100
INTERPRO	IPR019748:FERM central domain	3	0.280374	0.773661	FRMD4A, KRIT1, FRMD4B	1011	51	18559	1.07983	1	1	100
INTERPRO	IPR019749:Band 4.1 domain	3	0.280374	0.773661	FRMD4A, KRIT1, FRMD4B	1011	51	18559	1.07983	1	1	100
SMART	SM00295:B41	3	0.280374	0.819104	FRMD4A, KRIT1, FRMD4B	604	51	10057	0.979451	1	0.999932	100
Annotation Cluster 142	Enrichment Score: 0.11138865783974858
Category	Term	Count	%	PValue	Genes	List Total	Pop Hits	Pop Total	Fold Enrichment	Bonferroni	Benjamini	FDR
UP_SEQ_FEATURE	site:Reactive bond	3	0.280374	0.682868	APP, SERPINE2, COL6A3	1037	45	20063	1.28981	1	1	100
GOTERM_BP_DIRECT	GO:0010951~negative regulation of endopeptidase activity	7	0.654206	0.697895	APP, SERPINE2, COL6A3, BIRC6, SPOCK1, PTTG1, SERPINH1	962	121	16792	1.00981	1	0.99997	100
UP_KEYWORDS	Protease inhibitor	6	0.560748	0.761399	APP, GPC3, SERPINE2, COL6A3, BIRC6, NAIP	1047	124	20581	0.951151	1	0.972535	100
GOTERM_MF_DIRECT	GO:0004867~serine-type endopeptidase inhibitor activity	5	0.46729	0.815598	APP, SERPINE2, COL6A3, SPOCK1, SERPINH1	971	97	16881	0.896143	1	0.99973	100
UP_KEYWORDS	Serine protease inhibitor	3	0.280374	0.937221	APP, SERPINE2, COL6A3	1047	86	20581	0.685713	1	0.996811	100
Annotation Cluster 143	Enrichment Score: 0.11001967142623685
Category	Term	Count	%	PValue	Genes	List Total	Pop Hits	Pop Total	Fold Enrichment	Bonferroni	Benjamini	FDR
UP_SEQ_FEATURE	repeat:Solcar 3	3	0.280374	0.747555	SLC25A36, SLC25A6, SLC25A37	1037	51	20063	1.13807	1	1	100
UP_SEQ_FEATURE	repeat:Solcar 1	3	0.280374	0.775427	SLC25A36, SLC25A6, SLC25A37	1037	54	20063	1.07484	1	1	100
UP_SEQ_FEATURE	repeat:Solcar 2	3	0.280374	0.775427	SLC25A36, SLC25A6, SLC25A37	1037	54	20063	1.07484	1	1	100
INTERPRO	IPR018108:Mitochondrial substrate/solute carrier	3	0.280374	0.791751	SLC25A36, SLC25A6, SLC25A37	1011	53	18559	1.03908	1	1	100
INTERPRO	IPR023395:Mitochondrial carrier domain	3	0.280374	0.791751	SLC25A36, SLC25A6, SLC25A37	1011	53	18559	1.03908	1	1	100
Annotation Cluster 144	Enrichment Score: 0.10464251746969935
Category	Term	Count	%	PValue	Genes	List Total	Pop Hits	Pop Total	Fold Enrichment	Bonferroni	Benjamini	FDR
UP_KEYWORDS	Cell junction	34	3.17757	0.617585	CADM1, CLSTN1, PTK7, GJA1, ITGB1, CLDN15, PNN, DMXL2, HMCN1, GRIN2B, DMD, SAMD4A, DLG1, SYMPK, DBNL, CTBP2, MPDZ, CACNG8, LPP, MAP1B, PKN2, AHI1, VEZT, PCLO, RUFY3, GAK, EPHA4, SYNE2, SLC17A6, KRIT1, SVIL, ASH1L, VAMP2, DST	1047	675	20581	0.990136	1	0.927472	99.9999
UP_KEYWORDS	Synapse	16	1.49533	0.810323	DBNL, CTBP2, CADM1, MPDZ, CACNG8, MAP1B, CLSTN1, PCLO, EPHA4, SLC17A6, DMXL2, GRIN2B, DMD, VAMP2, SAMD4A, DLG1	1047	357	20581	0.880991	1	0.980602	100
GOTERM_CC_DIRECT	GO:0030054~cell junction	18	1.68224	0.969879	NAMPT, SLC2A11, CTBP2, CACNG8, MAP1B, CLSTN1, PKN2, PCLO, RUFY3, EPHA4, DMXL2, HMCN1, SLC17A6, GRIN2B, VAMP2, SAMD4A, NFIA, DLG1	1000	459	18224	0.714667	1	0.999987	100
Annotation Cluster 145	Enrichment Score: 0.09506007436762867
Category	Term	Count	%	PValue	Genes	List Total	Pop Hits	Pop Total	Fold Enrichment	Bonferroni	Benjamini	FDR
GOTERM_CC_DIRECT	GO:0005923~bicellular tight junction	6	0.560748	0.748704	SYMPK, MPDZ, FRMD4A, ASH1L, CLDN15, DLG1	1000	113	18224	0.967646	1	0.993375	100
UP_KEYWORDS	Tight junction	4	0.373832	0.81936	SYMPK, MPDZ, ASH1L, CLDN15	1047	86	20581	0.914284	1	0.981948	100
KEGG_PATHWAY	hsa04530:Tight junction	5	0.46729	0.845347	ACTB, ACTG1, SYMPK, MPDZ, CLDN15	463	87	6879	0.853877	1	0.985624	100
Annotation Cluster 146	Enrichment Score: 0.09345183375333763
Category	Term	Count	%	PValue	Genes	List Total	Pop Hits	Pop Total	Fold Enrichment	Bonferroni	Benjamini	FDR
UP_SEQ_FEATURE	domain:AGC-kinase C-terminal	3	0.280374	0.79248	PKN2, PRKG1, AKT2	1037	56	20063	1.03645	1	1	100
SMART	SM00133:S_TK_X	3	0.280374	0.81041	PKN2, PRKG1, AKT2	604	50	10057	0.99904	1	0.999933	100
INTERPRO	IPR000961:AGC-kinase, C-terminal	3	0.280374	0.816491	PKN2, PRKG1, AKT2	1011	56	18559	0.983415	1	1	100
Annotation Cluster 147	Enrichment Score: 0.09087330708743213
Category	Term	Count	%	PValue	Genes	List Total	Pop Hits	Pop Total	Fold Enrichment	Bonferroni	Benjamini	FDR
UP_SEQ_FEATURE	zinc finger region:C2H2-type 5	30	2.80374	0.483607	ZNF83, TSHZ2, ZNF292, ZFP14, ZNF451, ZNF800, ZKSCAN1, ZNF75A, ZNF655, ZNF518A, GLI3, ZNF224, ZNF680, BCL11A, ZNF302, ZNF397, ZNF493, PLAG1, ZNF644, POGZ, ZNF280D, ZNF791, ZNF26, MECOM, ZNF3, ZFHX4, TRPS1, ZNF462, ZNF431, ZNF117	1037	550	20063	1.0553	1	0.999998	99.9994
UP_SEQ_FEATURE	zinc finger region:C2H2-type 2	33	3.08411	0.498497	ZNF83, TSHZ2, ZNF292, ZFP14, ZNF451, ZNF800, ZKSCAN1, ZNF75A, ZNF655, ZNF518A, GLI3, ZNF618, ZBTB37, ZNF207, ZNF224, ZNF680, BCL11A, ZNF302, ZNF397, ZNF493, EGR1, PLAG1, ZNF644, POGZ, ZNF280D, ZNF791, ZNF26, MECOM, ZNF3, ZFHX4, ZNF431, ZNF462, ZNF117	1037	615	20063	1.03814	1	0.999998	99.9996
UP_SEQ_FEATURE	zinc finger region:C2H2-type 20	3	0.280374	0.561286	ZFHX4, ZNF462, ZNF493	1037	36	20063	1.61226	1	1	100
UP_SEQ_FEATURE	zinc finger region:C2H2-type 17	5	0.46729	0.617376	ZFHX4, ZNF224, ZNF791, ZNF462, ZNF493	1037	82	20063	1.1797	1	1	100
INTERPRO	IPR007087:Zinc finger, C2H2	42	3.92523	0.676698	ZNF83, TSHZ2, ZNF292, ZFP14, ZNF451, RBM5, ZNF800, ZNF75A, ZKSCAN1, ZNF638, ZNF655, ZNF518A, GLI3, ARID2, ZNF618, ZBTB37, ZNF207, ZNF224, ZNF680, BCL11A, ZNF302, ZNF397, ANKZF1, ZNF493, PLAG1, EGR1, ZNF644, POGZ, ZNF280D, ZNF791, ZNF26, CREB5, MECOM, GTF2H2, ZNF3, ZNF891, ZFHX4, TRPS1, ZNF431, ZNF462, ZNF117, GPATCH8	1011	799	18559	0.964952	1	0.999999	100
UP_SEQ_FEATURE	zinc finger region:C2H2-type 4	29	2.71028	0.699292	ZNF83, ZNF292, TSHZ2, ZFP14, ZNF451, ZNF800, ZKSCAN1, ZNF75A, ZNF655, ZNF518A, GLI3, ZNF618, ZNF224, ZNF680, BCL11A, ZNF302, ZNF397, PLAG1, ZNF644, POGZ, ZNF280D, ZNF791, ZNF26, MECOM, ZNF3, TRPS1, ZNF462, ZNF431, ZNF117	1037	588	20063	0.954196	1	1	100
UP_SEQ_FEATURE	zinc finger region:C2H2-type 1	27	2.52336	0.721481	ZNF292, TSHZ2, ZFP14, ZNF451, ZKSCAN1, ZNF75A, ZNF655, ZNF518A, GLI3, ZNF618, ZBTB37, ZNF207, ZNF224, ZNF680, BCL11A, ZNF302, ZNF397, EGR1, PLAG1, ZNF644, ZNF280D, ZNF791, ZNF26, MECOM, ZNF3, ZFHX4, ZNF462	1037	554	20063	0.942912	1	1	100
UP_SEQ_FEATURE	zinc finger region:C2H2-type 6	24	2.24299	0.749753	PLAG1, ZNF83, ZNF292, ZFP14, ZNF644, POGZ, ZNF451, ZNF800, ZNF791, ZNF26, ZKSCAN1, ZNF655, MECOM, ZNF3, ZFHX4, ZNF224, ZNF680, TRPS1, BCL11A, ZNF302, ZNF397, ZNF431, ZNF462, ZNF117	1037	501	20063	0.92681	1	1	100
UP_SEQ_FEATURE	zinc finger region:C2H2-type 16	5	0.46729	0.785133	ZFHX4, ZNF224, ZNF791, ZNF462, ZNF493	1037	103	20063	0.939182	1	1	100
UP_SEQ_FEATURE	zinc finger region:C2H2-type 13	9	0.841121	0.832525	ZNF83, ZFHX4, ZFP14, ZNF224, ZNF791, ZNF431, ZNF462, ZNF26, ZNF493	1037	204	20063	0.853551	1	1	100
UP_SEQ_FEATURE	zinc finger region:C2H2-type 3	29	2.71028	0.834497	ZNF83, ZNF292, ZFP14, ZNF451, ZNF800, ZKSCAN1, ZNF75A, ZNF655, ZNF518A, GLI3, ZNF618, ZBTB37, ZNF224, ZNF680, BCL11A, ZNF302, ZNF397, ZNF493, EGR1, PLAG1, ZNF644, POGZ, ZNF791, ZNF26, MECOM, ZNF3, ZFHX4, ZNF462, ZNF431	1037	636	20063	0.882182	1	1	100
UP_SEQ_FEATURE	zinc finger region:C2H2-type 18	3	0.280374	0.855788	ZFHX4, ZNF224, ZNF493	1037	65	20063	0.892946	1	1	100
INTERPRO	IPR015880:Zinc finger, C2H2-like	36	3.36449	0.873754	ZNF83, TSHZ2, ZNF292, ZFP14, ZNF451, ZNF800, ZNF75A, ZKSCAN1, ZNF638, ZNF655, ZNF518A, GLI3, ZNF618, ZBTB37, ZNF207, ZNF224, ZNF680, BCL11A, ZNF302, ZNF397, ZNF493, PLAG1, EGR1, ZNF644, POGZ, ZNF280D, ZNF791, ZNF26, MECOM, ZNF3, ZNF891, ZFHX4, TRPS1, ZNF431, ZNF462, ZNF117	1011	762	18559	0.867263	1	1	100
UP_SEQ_FEATURE	zinc finger region:C2H2-type 7	20	1.86916	0.877282	PLAG1, ZNF83, ZNF292, ZFP14, ZNF644, POGZ, ZNF800, ZNF791, ZNF26, MECOM, ZNF3, ZFHX4, ZNF224, ZNF680, TRPS1, ZNF302, ZNF397, ZNF462, ZNF431, ZNF117	1037	463	20063	0.83573	1	1	100
UP_SEQ_FEATURE	zinc finger region:C2H2-type 9	16	1.49533	0.898826	ZNF83, ZNF292, ZFP14, POGZ, ZNF451, ZNF791, ZNF26, MECOM, ZFHX4, ZNF224, ZNF680, ZNF397, ZNF462, ZNF431, ZNF117, ZNF493	1037	385	20063	0.804038	1	1	100
UP_SEQ_FEATURE	zinc finger region:C2H2-type 11	12	1.1215	0.91309	ZNF83, ZFHX4, ZFP14, ZNF224, ZNF680, ZNF451, ZNF791, ZNF431, ZNF462, ZNF26, ZNF117, ZNF493	1037	301	20063	0.771315	1	1	100
UP_SEQ_FEATURE	zinc finger region:C2H2-type 12	10	0.934579	0.916922	ZNF83, ZFHX4, ZFP14, ZNF224, ZNF680, ZNF791, ZNF431, ZNF462, ZNF26, ZNF493	1037	256	20063	0.755748	1	1	100
UP_SEQ_FEATURE	zinc finger region:C2H2-type 15	5	0.46729	0.917426	ZNF83, ZNF224, ZNF791, ZNF462, ZNF493	1037	133	20063	0.727337	1	1	100
UP_SEQ_FEATURE	zinc finger region:C2H2-type 8	16	1.49533	0.958924	ZNF83, ZNF292, ZFP14, POGZ, ZNF451, ZNF791, ZNF26, MECOM, ZNF3, ZFHX4, ZNF224, ZNF680, ZNF397, ZNF462, ZNF431, ZNF117	1037	427	20063	0.724952	1	1	100
UP_SEQ_FEATURE	zinc finger region:C2H2-type 14	5	0.46729	0.963281	ZNF83, ZFHX4, ZNF791, ZNF462, ZNF493	1037	156	20063	0.620101	1	1	100
SMART	SM00355:ZnF_C2H2	36	3.36449	0.965981	ZNF83, TSHZ2, ZNF292, ZFP14, ZNF451, ZNF800, ZNF75A, ZKSCAN1, ZNF638, ZNF655, ZNF518A, GLI3, ZNF618, ZBTB37, ZNF207, ZNF224, ZNF680, BCL11A, ZNF302, ZNF397, ZNF493, PLAG1, EGR1, ZNF644, POGZ, ZNF280D, ZNF791, ZNF26, MECOM, ZNF3, ZNF891, ZFHX4, TRPS1, ZNF431, ZNF462, ZNF117	604	762	10057	0.786645	1	1	100
UP_SEQ_FEATURE	zinc finger region:C2H2-type 10	12	1.1215	0.967782	ZNF83, ZFHX4, ZFP14, ZNF224, ZNF680, ZNF451, ZNF791, ZNF431, ZNF462, ZNF26, MECOM, ZNF493	1037	341	20063	0.680838	1	1	100
INTERPRO	IPR013087:Zinc finger C2H2-type/integrase DNA-binding domain	29	2.71028	0.975318	ZNF83, ZNF292, ZFP14, ZNF800, ZKSCAN1, ZNF75A, ZNF655, ZNF518A, GLI3, ZBTB37, ZNF224, ZNF680, BCL11A, ZNF302, ZNF397, ZNF493, EGR1, PLAG1, ZNF644, ZNF791, CREB5, ZNF26, MECOM, ZNF3, ZNF891, ZFHX4, ZNF462, ZNF431, ZNF117	1011	712	18559	0.74769	1	1	100
INTERPRO	IPR001909:Krueppel-associated box	14	1.30841	0.986781	ZNF83, ZFP14, ZNF224, ZNF680, ZNF302, ZNF791, ZNF26, ZNF431, ZNF75A, ZKSCAN1, ZNF655, ZNF3, ZNF493, ZNF891	1011	402	18559	0.639301	1	1	100
UP_SEQ_FEATURE	domain:KRAB	10	0.934579	0.993185	ZFP14, ZNF224, ZNF680, ZNF302, ZNF791, ZNF431, ZNF75A, ZNF26, ZKSCAN1, ZNF3	1037	343	20063	0.564057	1	1	100
SMART	SM00349:KRAB	14	1.30841	0.994889	ZNF83, ZFP14, ZNF224, ZNF680, ZNF302, ZNF791, ZNF26, ZNF431, ZNF75A, ZKSCAN1, ZNF655, ZNF3, ZNF493, ZNF891	604	392	10057	0.594667	1	1	100
Annotation Cluster 148	Enrichment Score: 0.0898364142499944
Category	Term	Count	%	PValue	Genes	List Total	Pop Hits	Pop Total	Fold Enrichment	Bonferroni	Benjamini	FDR
UP_KEYWORDS	Innate immunity	14	1.30841	0.570123	HMGB3, LGALS3, ATG12, IFITM2, IFITM3, NLRP1, MIF, TRIM56, TRIM38, CD46, PCBP2, CFH, NAIP, ADAR	1047	261	20581	1.0544	1	0.911658	99.9993
UP_KEYWORDS	Immunity	19	1.7757	0.954476	DBNL, HMGB3, LGALS3, ATG12, CADM1, IFITM2, IFITM3, HLA-A, HLA-B, NLRP1, B2M, MIF, TRIM56, TRIM38, CD46, PCBP2, CFH, NAIP, ADAR	1047	500	20581	0.74697	1	0.998155	100
GOTERM_BP_DIRECT	GO:0045087~innate immune response	16	1.49533	0.988	HMGB3, LGALS3, ATG12, HLA-B, NLRP1, B2M, MIF, APP, CD46, PCBP2, NAIP, UBB, IKBKB, UBA52, RPS27A, ADAR	962	430	16792	0.6495	1	1	100
Annotation Cluster 149	Enrichment Score: 0.08776075447337063
Category	Term	Count	%	PValue	Genes	List Total	Pop Hits	Pop Total	Fold Enrichment	Bonferroni	Benjamini	FDR
UP_KEYWORDS	Sushi	3	0.280374	0.784968	CD46, CFH, VCAN	1047	56	20581	1.05306	1	0.976422	100
INTERPRO	IPR000436:Sushi/SCR/CCP	3	0.280374	0.824134	CD46, CFH, VCAN	1011	57	18559	0.966162	1	1	100
SMART	SM00032:CCP	3	0.280374	0.843078	CD46, CFH, VCAN	604	54	10057	0.925037	1	0.999959	100
Annotation Cluster 150	Enrichment Score: 0.08437332490252594
Category	Term	Count	%	PValue	Genes	List Total	Pop Hits	Pop Total	Fold Enrichment	Bonferroni	Benjamini	FDR
GOTERM_BP_DIRECT	GO:0006814~sodium ion transport	5	0.46729	0.688458	SLC5A3, SLC38A2, SLC17A6, SLC38A1, TRAPPC10	962	81	16792	1.07749	1	0.999965	100
KEGG_PATHWAY	hsa04724:Glutamatergic synapse	7	0.654206	0.787034	SLC38A2, SLC17A6, GRIN2B, GLS, SLC38A1, CACNA1C, GNG5	463	114	6879	0.9123	1	0.984355	100
UP_KEYWORDS	Sodium transport	5	0.46729	0.851674	SLC5A3, SLC38A2, SLC17A6, ATP1A1, SLC38A1	1047	117	20581	0.840048	1	0.986914	100
UP_KEYWORDS	Sodium	5	0.46729	0.881031	SLC5A3, SLC38A2, SLC17A6, ATP1A1, SLC38A1	1047	124	20581	0.792626	1	0.991031	100
UP_KEYWORDS	Symport	4	0.373832	0.931104	SLC5A3, SLC38A2, SLC17A6, SLC38A1	1047	113	20581	0.695827	1	0.996433	100
Annotation Cluster 151	Enrichment Score: 0.0829454776227809
Category	Term	Count	%	PValue	Genes	List Total	Pop Hits	Pop Total	Fold Enrichment	Bonferroni	Benjamini	FDR
INTERPRO	IPR013098:Immunoglobulin I-set	10	0.934579	0.360432	NCAM1, NRCAM, FGFR1, PXDN, PTPRD, HMCN1, CADM1, PTK7, LRFN5, BOC	1011	141	18559	1.30192	1	0.999248	99.9478
UP_SEQ_FEATURE	domain:Ig-like C2-type 4	5	0.46729	0.556855	NCAM1, PXDN, HMCN1, PTK7, BOC	1037	76	20063	1.27284	1	1	100
UP_SEQ_FEATURE	domain:Ig-like C2-type 3	7	0.654206	0.653468	NCAM1, FGFR1, PXDN, PTPRD, HMCN1, PTK7, BOC	1037	128	20063	1.05805	1	1	100
UP_SEQ_FEATURE	domain:Ig-like C2-type 5	3	0.280374	0.784101	NCAM1, HMCN1, PTK7	1037	55	20063	1.0553	1	1	100
INTERPRO	IPR003598:Immunoglobulin subtype 2	11	1.02804	0.879137	NCAM1, NRCAM, FGFR1, PXDN, PTPRD, BSG, HMCN1, CADM1, PTK7, LRFN5, BOC	1011	250	18559	0.807711	1	1	100
UP_SEQ_FEATURE	domain:Ig-like C2-type 1	8	0.747664	0.902024	NCAM1, FGFR1, PXDN, PTPRD, HMCN1, CADM1, PTK7, BOC	1037	202	20063	0.766224	1	1	100
UP_SEQ_FEATURE	domain:Ig-like C2-type 2	8	0.747664	0.904647	NCAM1, FGFR1, PXDN, PTPRD, HMCN1, CADM1, PTK7, BOC	1037	203	20063	0.762449	1	1	100
SMART	SM00408:IGc2	11	1.02804	0.938011	NCAM1, NRCAM, FGFR1, PXDN, PTPRD, BSG, HMCN1, CADM1, PTK7, LRFN5, BOC	604	250	10057	0.732629	1	0.999999	100
UP_KEYWORDS	Immunoglobulin domain	16	1.49533	0.997678	FGFR1, PTPRD, BSG, PXDN, CADM1, HLA-A, PTK7, B2M, NCAM1, NRCAM, HMCN1, SEMA3E, VCAN, LRFN5, BOC, PILRB	1047	546	20581	0.576033	1	0.999987	100
INTERPRO	IPR003599:Immunoglobulin subtype	14	1.30841	0.999321	NRCAM, NCAM1, FGFR1, PTPRD, PXDN, BSG, HMCN1, CADM1, PTK7, VCAN, LRFN5, BOC, PILRB, B2M	1011	497	18559	0.517101	1	1	100
SMART	SM00409:IG	14	1.30841	0.9999	NRCAM, NCAM1, FGFR1, PTPRD, PXDN, BSG, HMCN1, CADM1, PTK7, VCAN, LRFN5, BOC, PILRB, B2M	604	497	10057	0.469033	1	1	100
INTERPRO	IPR013783:Immunoglobulin-like fold	28	2.61682	0.999972	FGFR1, PXDN, CADM1, PTK7, B2M, MYCBP2, NRCAM, HMCN1, COL6A3, NFAT5, LRFN5, BOC, PILRB, FN1, PTPRD, BSG, PTPRG, PLXNB2, HLA-A, HLA-B, FLNA, NCAM1, EPHA4, COL14A1, EBF2, EBF1, VCAN, RBPJ	1011	951	18559	0.540482	1	1	100
INTERPRO	IPR007110:Immunoglobulin-like domain	17	1.58879	0.999999	FGFR1, PTPRD, BSG, PXDN, CADM1, HLA-A, PTK7, HLA-B, B2M, NCAM1, NRCAM, HMCN1, SEMA3E, VCAN, LRFN5, BOC, PILRB	1011	771	18559	0.40476	1	1	100
INTERPRO	IPR013106:Immunoglobulin V-set	5	0.46729	1	HMCN1, CADM1, VCAN, PILRB, B2M	1011	417	18559	0.220109	1	1	100
Annotation Cluster 152	Enrichment Score: 0.06480727939807007
Category	Term	Count	%	PValue	Genes	List Total	Pop Hits	Pop Total	Fold Enrichment	Bonferroni	Benjamini	FDR
UP_SEQ_FEATURE	domain:PDZ	5	0.46729	0.841428	PDLIM4, CNKSR3, SYNJ2BP, PCLO, AHNAK	1037	113	20063	0.856069	1	1	100
INTERPRO	IPR001478:PDZ domain	7	0.654206	0.853916	MPDZ, PDLIM4, CNKSR3, SYNJ2BP, PCLO, AHNAK, DLG1	1011	155	18559	0.829029	1	1	100
SMART	SM00228:PDZ	7	0.654206	0.8895	MPDZ, PDLIM4, CNKSR3, SYNJ2BP, PCLO, AHNAK, DLG1	604	149	10057	0.782246	1	0.999992	100
Annotation Cluster 153	Enrichment Score: 0.04953391826961801
Category	Term	Count	%	PValue	Genes	List Total	Pop Hits	Pop Total	Fold Enrichment	Bonferroni	Benjamini	FDR
UP_KEYWORDS	Synapse	16	1.49533	0.810323	DBNL, CTBP2, CADM1, MPDZ, CACNG8, MAP1B, CLSTN1, PCLO, EPHA4, SLC17A6, DMXL2, GRIN2B, DMD, VAMP2, SAMD4A, DLG1	1047	357	20581	0.880991	1	0.980602	100
UP_KEYWORDS	Postsynaptic cell membrane	7	0.654206	0.897236	EPHA4, GRIN2B, MPDZ, CACNG8, DMD, CLSTN1, DLG1	1047	179	20581	0.768714	1	0.993347	100
GOTERM_CC_DIRECT	GO:0045211~postsynaptic membrane	7	0.654206	0.976862	EPHA4, GRIN2B, MPDZ, CACNG8, DMD, CLSTN1, DLG1	1000	211	18224	0.604588	1	0.999994	100
Annotation Cluster 154	Enrichment Score: 0.027434726815572998
Category	Term	Count	%	PValue	Genes	List Total	Pop Hits	Pop Total	Fold Enrichment	Bonferroni	Benjamini	FDR
GOTERM_BP_DIRECT	GO:0050896~response to stimulus	3	0.280374	0.877128	HMCN1, TGFBI, PPT1	962	62	16792	0.844611	1	1	100
UP_KEYWORDS	Vision	4	0.373832	0.936087	HMCN1, ADGRV1, TGFBI, PPT1	1047	115	20581	0.683726	1	0.996868	100
GOTERM_BP_DIRECT	GO:0007601~visual perception	8	0.747664	0.94598	EYA4, PRR4, HMCN1, ADGRV1, TGFBI, PPT1, COL1A1, MYO9A	962	201	16792	0.694738	1	1	100
UP_KEYWORDS	Sensory transduction	4	0.373832	1	HMCN1, ADGRV1, TGFBI, PPT1	1047	609	20581	0.129111	1	1	100
Annotation Cluster 155	Enrichment Score: 0.02552867892793447
Category	Term	Count	%	PValue	Genes	List Total	Pop Hits	Pop Total	Fold Enrichment	Bonferroni	Benjamini	FDR
INTERPRO	IPR011705:BTB/Kelch-associated	3	0.280374	0.85821	LGALS3BP, BTBD7, KLHL24	1011	62	18559	0.888245	1	1	100
SMART	SM00875:SM00875	3	0.280374	0.882574	LGALS3BP, BTBD7, KLHL24	604	60	10057	0.832533	1	0.99999	100
INTERPRO	IPR000210:BTB/POZ-like	6	0.560748	0.970538	LGALS3BP, BTBD7, KLHL24, ANKFY1, ZBTB37, RHOBTB3	1011	180	18559	0.611902	1	1	100
INTERPRO	IPR011333:BTB/POZ fold	6	0.560748	0.979636	LGALS3BP, BTBD7, KLHL24, ANKFY1, ZBTB37, RHOBTB3	1011	190	18559	0.579697	1	1	100
UP_SEQ_FEATURE	domain:BTB	4	0.373832	0.981266	LGALS3BP, KLHL24, ANKFY1, ZBTB37	1037	144	20063	0.537421	1	1	100
SMART	SM00225:BTB	5	0.46729	0.994533	BTBD7, KLHL24, ANKFY1, ZBTB37, RHOBTB3	604	176	10057	0.47303	1	1	100
Annotation Cluster 156	Enrichment Score: 0.019566760764361927
Category	Term	Count	%	PValue	Genes	List Total	Pop Hits	Pop Total	Fold Enrichment	Bonferroni	Benjamini	FDR
UP_SEQ_FEATURE	repeat:LRR 6	9	0.841121	0.851175	PXDN, SYNE2, COL6A3, LRCH3, LRRC17, PIDD1, LRFN5, TPBG, NLRP1	1037	209	20063	0.833131	1	1	100
UP_SEQ_FEATURE	repeat:LRR 7	7	0.654206	0.896819	SYNE2, COL6A3, LRCH3, PIDD1, LRFN5, TPBG, NLRP1	1037	176	20063	0.769489	1	1	100
UP_SEQ_FEATURE	repeat:LRR 5	9	0.841121	0.914338	PXDN, SYNE2, COL6A3, LRCH3, LRRC17, PIDD1, LRFN5, TPBG, NLRP1	1037	231	20063	0.753785	1	1	100
INTERPRO	IPR000483:Cysteine-rich flanking region, C-terminal	3	0.280374	0.944831	PXDN, LRRC17, TPBG	1011	83	18559	0.663509	1	1	100
UP_SEQ_FEATURE	repeat:LRR 3	11	1.02804	0.952777	PXDN, SYNE2, CEP78, COL6A3, LRCH3, LRRC17, PIDD1, LRFN5, SPG11, TPBG, NLRP1	1037	302	20063	0.704698	1	1	100
UP_SEQ_FEATURE	repeat:LRR 4	9	0.841121	0.955618	PXDN, SYNE2, COL6A3, LRCH3, LRRC17, PIDD1, LRFN5, TPBG, NLRP1	1037	255	20063	0.682841	1	1	100
SMART	SM00082:LRRCT	3	0.280374	0.963365	PXDN, LRRC17, TPBG	604	83	10057	0.601831	1	1	100
INTERPRO	IPR003591:Leucine-rich repeat, typical subtype	6	0.560748	0.968316	PXDN, LRCH3, LRRC17, PIDD1, LRFN5, TPBG	1011	178	18559	0.618778	1	1	100
UP_SEQ_FEATURE	repeat:LRR 1	11	1.02804	0.971654	PXDN, SYNE2, CEP78, COL6A3, LRCH3, LRRC17, PIDD1, LRFN5, SPG11, TPBG, NLRP1	1037	321	20063	0.662987	1	1	100
UP_SEQ_FEATURE	repeat:LRR 2	11	1.02804	0.972426	PXDN, SYNE2, CEP78, COL6A3, LRCH3, LRRC17, PIDD1, LRFN5, SPG11, TPBG, NLRP1	1037	322	20063	0.660928	1	1	100
SMART	SM00369:LRR_TYP	6	0.560748	0.98431	PXDN, LRCH3, LRRC17, PIDD1, LRFN5, TPBG	604	178	10057	0.561258	1	1	100
INTERPRO	IPR001611:Leucine-rich repeat	8	0.747664	0.990241	PXDN, CEP78, LRCH3, LRRC17, PIDD1, LRFN5, TPBG, NLRP1	1011	263	18559	0.55839	1	1	100
UP_SEQ_FEATURE	repeat:LRR 9	3	0.280374	0.993308	SYNE2, COL6A3, LRCH3	1037	134	20063	0.433145	1	1	100
UP_KEYWORDS	Leucine-rich repeat	8	0.747664	0.996351	PXDN, MACF1, LRCH3, LRRC17, PIDD1, LRFN5, TPBG, NLRP1	1047	311	20581	0.505649	1	0.999974	100
UP_SEQ_FEATURE	repeat:LRR 8	3	0.280374	0.996538	SYNE2, COL6A3, LRCH3	1037	148	20063	0.392172	1	1	100
Annotation Cluster 157	Enrichment Score: 0.015246455082688768
Category	Term	Count	%	PValue	Genes	List Total	Pop Hits	Pop Total	Fold Enrichment	Bonferroni	Benjamini	FDR
KEGG_PATHWAY	hsa05162:Measles	6	0.560748	0.950091	CCND2, CD46, NFKBIA, PIK3R1, AKT2, ADAR	463	133	6879	0.670261	1	0.996428	100
KEGG_PATHWAY	hsa04917:Prolactin signaling pathway	3	0.280374	0.956843	CCND2, PIK3R1, AKT2	463	71	6879	0.62778	1	0.997033	100
KEGG_PATHWAY	hsa04630:Jak-STAT signaling pathway	5	0.46729	0.990045	CCND2, PIAS2, PIAS1, PIK3R1, AKT2	463	145	6879	0.512326	1	0.999539	100
Annotation Cluster 158	Enrichment Score: 0.012283901404507446
Category	Term	Count	%	PValue	Genes	List Total	Pop Hits	Pop Total	Fold Enrichment	Bonferroni	Benjamini	FDR
GOTERM_BP_DIRECT	GO:0007156~homophilic cell adhesion via plasma membrane adhesion molecules	7	0.654206	0.894947	CADM1, FAT3, PLXNB2, TENM3, CLSTN1, ITGB1, CDH11	962	158	16792	0.773336	1	1	100
UP_SEQ_FEATURE	domain:Cadherin 2	3	0.280374	0.983872	FAT3, CLSTN1, CDH11	1037	115	20063	0.504708	1	1	100
UP_SEQ_FEATURE	domain:Cadherin 1	3	0.280374	0.983872	FAT3, CLSTN1, CDH11	1037	115	20063	0.504708	1	1	100
INTERPRO	IPR002126:Cadherin	3	0.280374	0.989597	FAT3, CLSTN1, CDH11	1011	118	18559	0.466705	1	1	100
INTERPRO	IPR015919:Cadherin-like	3	0.280374	0.990567	FAT3, CLSTN1, CDH11	1011	120	18559	0.458927	1	1	100
SMART	SM00112:CA	3	0.280374	0.993756	FAT3, CLSTN1, CDH11	604	116	10057	0.430621	1	1	100
Annotation Cluster 159	Enrichment Score: 0.011530545440685753
Category	Term	Count	%	PValue	Genes	List Total	Pop Hits	Pop Total	Fold Enrichment	Bonferroni	Benjamini	FDR
INTERPRO	IPR001806:Small GTPase superfamily	5	0.46729	0.94857	RHOJ, ARHGAP5, RAN, ARHGAP35, RHOBTB3	1011	139	18559	0.660326	1	1	100
GOTERM_BP_DIRECT	GO:0007264~small GTPase mediated signal transduction	9	0.841121	0.973871	RHOJ, ARHGAP5, HACD3, RAN, KRIT1, ARHGAP35, DOCK5, RGL2, RHOBTB3	962	246	16792	0.638609	1	1	100
GOTERM_MF_DIRECT	GO:0005525~GTP binding	10	0.934579	0.999626	RHOJ, EEF1A1, HSP90AA1, ARHGAP5, RAN, EIF5B, ARHGAP35, TUBA1B, TUBB4B, RHOBTB3	971	384	16881	0.452739	1	1	100
Annotation Cluster 160	Enrichment Score: 0.006477006472379079
Category	Term	Count	%	PValue	Genes	List Total	Pop Hits	Pop Total	Fold Enrichment	Bonferroni	Benjamini	FDR
UP_SEQ_FEATURE	metal ion-binding site:Iron (heme axial ligand)	3	0.280374	0.966722	PXDN, CYCS, CYP20A1	1037	99	20063	0.586277	1	1	100
UP_KEYWORDS	Heme	3	0.280374	0.991885	PXDN, CYCS, CYP20A1	1047	132	20581	0.446753	1	0.999899	100
GOTERM_MF_DIRECT	GO:0020037~heme binding	3	0.280374	0.997255	PXDN, CYCS, CYP20A1	971	137	16881	0.380697	1	1	100
Annotation Cluster 161	Enrichment Score: 0.004555031631556557
Category	Term	Count	%	PValue	Genes	List Total	Pop Hits	Pop Total	Fold Enrichment	Bonferroni	Benjamini	FDR
UP_SEQ_FEATURE	domain:PH	8	0.747664	0.972099	PLEKHA4, KIF1B, ACAP3, ACAP2, ARHGEF40, CYTH2, PRKD3, AKT2	1037	245	20063	0.631744	1	1	100
INTERPRO	IPR001849:Pleckstrin homology domain	8	0.747664	0.992665	PLEKHA4, KIF1B, ACAP3, ACAP2, ARHGEF40, CYTH2, PRKD3, AKT2	1011	271	18559	0.541906	1	1	100
SMART	SM00233:PH	8	0.747664	0.996654	PLEKHA4, KIF1B, ACAP3, ACAP2, ARHGEF40, CYTH2, PRKD3, AKT2	604	264	10057	0.504566	1	1	100
INTERPRO	IPR011993:Pleckstrin homology-like domain	13	1.21495	0.997062	PLEKHA4, RABGAP1, KIF1B, ACAP3, FRMD4A, FRMD4B, ACAP2, ARHGEF40, CYTH2, EVL, NBEAL1, PRKD3, AKT2	1011	427	18559	0.55888	1	1	100
Annotation Cluster 162	Enrichment Score: 0.0016181946506583725
Category	Term	Count	%	PValue	Genes	List Total	Pop Hits	Pop Total	Fold Enrichment	Bonferroni	Benjamini	FDR
GOTERM_MF_DIRECT	GO:0003924~GTPase activity	8	0.747664	0.983162	RHOJ, EEF1A1, ARHGAP5, RAN, EIF5B, GNG5, TUBA1B, TUBB4B	971	234	16881	0.594365	1	1	100
INTERPRO	IPR005225:Small GTP-binding protein domain	3	0.280374	0.999104	RHOJ, RAN, EIF5B	1011	167	18559	0.329768	1	1	100
GOTERM_MF_DIRECT	GO:0005525~GTP binding	10	0.934579	0.999626	RHOJ, EEF1A1, HSP90AA1, ARHGAP5, RAN, EIF5B, ARHGAP35, TUBA1B, TUBB4B, RHOBTB3	971	384	16881	0.452739	1	1	100
UP_SEQ_FEATURE	nucleotide phosphate-binding region:GTP	6	0.560748	0.999712	RHOJ, EEF1A1, RAN, EIF5B, TUBA1B, TUBB4B	1037	310	20063	0.374461	1	1	100
UP_KEYWORDS	GTP-binding	6	0.560748	0.999909	RHOJ, EEF1A1, RAN, EIF5B, TUBA1B, TUBB4B	1047	343	20581	0.343856	1	1	100
Annotation Cluster 163	Enrichment Score: 8.421257524695917E-4
Category	Term	Count	%	PValue	Genes	List Total	Pop Hits	Pop Total	Fold Enrichment	Bonferroni	Benjamini	FDR
UP_KEYWORDS	Serine protease	3	0.280374	0.994637	PCSK7, PRSS23, MBTPS1	1047	141	20581	0.418237	1	0.999948	100
UP_SEQ_FEATURE	active site:Charge relay system	3	0.280374	0.999756	PCSK7, PRSS23, MBTPS1	1037	203	20063	0.285919	1	1	100
GOTERM_MF_DIRECT	GO:0004252~serine-type endopeptidase activity	5	0.46729	0.999804	CTSD, PCSK7, MMP14, PRSS23, MBTPS1	971	255	16881	0.340886	1	1	100
Annotation Cluster 164	Enrichment Score: 6.62784602258522E-4
Category	Term	Count	%	PValue	Genes	List Total	Pop Hits	Pop Total	Fold Enrichment	Bonferroni	Benjamini	FDR
UP_KEYWORDS	Homeobox	6	0.560748	0.99762	HOXC6, TSHZ2, ZFHX4, MEIS2, PBX1, CUX1	1047	262	20581	0.450163	1	0.999987	100
INTERPRO	IPR017970:Homeobox, conserved site	4	0.373832	0.99834	HOXC6, ZFHX4, PBX1, CUX1	1011	190	18559	0.386465	1	1	100
INTERPRO	IPR001356:Homeodomain	6	0.560748	0.998538	HOXC6, TSHZ2, ZFHX4, MEIS2, PBX1, CUX1	1011	256	18559	0.430244	1	1	100
SMART	SM00389:HOX	6	0.560748	0.999404	HOXC6, TSHZ2, ZFHX4, MEIS2, PBX1, CUX1	604	250	10057	0.399616	1	1	100
Annotation Cluster 165	Enrichment Score: 1.771031440830999E-4
Category	Term	Count	%	PValue	Genes	List Total	Pop Hits	Pop Total	Fold Enrichment	Bonferroni	Benjamini	FDR
UP_KEYWORDS	Secreted	76	7.1028	0.99772	MTRNR2L8, COPA, NAMPT, PXDN, LTBP1, MTRNR2L12, LTBP3, LTBP4, FSTL1, LRRC17, YBX1, B2M, NRCAM, LNPEP, GPC3, HMCN1, SERPINE2, CTGF, SEMA3E, TGFBI, CFH, PDGFC, ANGPT1, EMC10, CYR61, EGFR, HNRNPA2B1, CD164, NCAM1, GRN, TXN, COL1A2, CTSD, VCAN, LRCH3, COL1A1, CCL2, COL3A1, PPT1, IL32, SPOCK1, ITM2B, CALR, VIT, EXTL2, MDK, PCOLCE, CALU, MIF, LGALS3BP, LECT1, PRR4, NHLRC3, PLA2G12A, COL6A3, TFF2, COL6A2…	1047	1965	20581	0.760275	1	0.999987	100
UP_SEQ_FEATURE	signal peptide	137	12.8037	0.999477	TGOLN2, LTBP1, CADM1, LTBP3, LTBP4, FSTL1, PRKCSH, SSR1, B2M, NRCAM, APP, HMCN1, GRIN2B, SERPINE2, CTGF, PLOD3, CD46, TGFBI, CFH, PDGFC, RPN2, DDOST, EGFR, BSG, PTPRG, PLXNB2, HLA-A, STIM2, HLA-B, NCAM1, COL1A2, LRCH3, COL1A1, GLG1, FGFR1, CCL2, PTK7, PPT1, IL32, RIC3, CALR, VIT, LMAN1, SERPINH1, MDK, ITGB1, CALU, LGALS3BP, MIA3, PRR4, ITGB8, TFF2, TMED10, LRFN5, LAMB1, FN1, P4HB, MRC2, TPBG, THS…	1037	3346	20063	0.792158	1	1	100
UP_KEYWORDS	Signal	165	15.4206	0.999951	TGOLN2, LTBP1, CADM1, LTBP3, LTBP4, FSTL1, PRKCSH, SSR1, B2M, NRCAM, N4BP2L2, APP, HMCN1, GRIN2B, SERPINE2, CTGF, PLOD3, CD46, TGFBI, CFH, PDGFC, RPN2, DDOST, EGFR, BSG, SLC12A9, PTPRG, PLXNB2, HLA-A, STIM2, HLA-B, MARK3, NCAM1, RALGAPA1, COL1A2, LRCH3, COL1A1, GLG1, FGFR1, CCL2, SLC35E2B, PTK7, MUM1, PPT1, IL32, RIC3, VIT, CALR, LMAN1, EXTL2, MDK, SERPINH1, ITGB1, CALU, MIA3, LGALS3BP, TOMM7, PR…	1047	4160	20581	0.779669	1	1	100
UP_KEYWORDS	Disulfide bond	115	10.7477	1	LTBP1, CADM1, LTBP3, LTBP4, FSTL1, PRKG1, B2M, NRCAM, APP, HMCN1, GRIN2B, CTGF, CD46, TGFBI, CFH, PDGFC, ASPH, EGFR, BSG, PTPRG, PLXNB2, HLA-A, HLA-B, NCAM1, COL1A2, COL1A1, FGFR1, CCL2, HMGB3, PTK7, CHCHD2, PPT1, CALR, VIT, LMAN1, MDK, ITGB1, EXTL2, LGALS3BP, ITGB8, NPM1, TFF2, COX6B1, LRFN5, LAMB1, FN1, P4HB, LGALS3, MRC2, S100A11, TPBG, THSD7A, NOTCH2, SEMA6A, DNASE1, LAMP1, LAMA4, COL14A1, CA…	1047	3434	20581	0.65829	1	1	100
UP_SEQ_FEATURE	disulfide bond	95	8.8785	1	PXDN, LTBP1, CADM1, PDIA3, LTBP3, HEXA, LTBP4, PRDX5, PDIA6, GJA1, FSTL1, PDIA4, PRKG1, CANX, PRDX1, DDR2, B2M, NRCAM, APP, HMCN1, CTGF, CD46, SEMA3E, TGFBI, CFH, PDGFC, ANGPT1, BOC, CYR61, EGFR, BSG, ADAM10, HLA-A, CNPY2, HLA-B, CLIC1, MMP14, CCNL2, NCAM1, UQCRH, GRN, IGF2R, TXN, MGEA5, ADAM17, CTSD, VCAN, COL1A1, FGFR1, CCL2, COL3A1, PTK7, PPT1, SPOCK1, LMAN1, CALR, VIT, MDK, EXTL2, ITGB1, PCOL…	1037	2917	20063	0.630092	1	1	100
UP_KEYWORDS	Glycoprotein	156	14.5794	1	TGOLN2, HM13, LTBP1, CADM1, LTBP3, LTBP4, FSTL1, KIAA0319L, PRKCSH, SSR1, B2M, NRCAM, APP, HMCN1, GRIN2B, SERPINE2, CTGF, LTB4R, PLOD3, CD46, ATF6B, CFH, PDGFC, OGT, RPN2, ASPH, EGFR, PLD3, TOR1AIP2, BSG, SLC12A9, PTPRG, PLXNB2, HLA-A, STIM2, HLA-B, NCAM1, KRT18, COL1A2, COL1A1, SLC38A1, GLG1, FGFR1, SLC2A11, SLC38A2, CCL2, PTK7, PPT1, CALR, VIT, EXTL2, SERPINH1, ITGB1, CALU, CEPT1, LGALS3BP, MIA…	1047	4551	20581	0.67381	1	1	100
UP_SEQ_FEATURE	glycosylation site:N-linked (GlcNAc...)	142	13.271	1	TGOLN2, HM13, LTBP1, CADM1, LTBP3, LTBP4, FSTL1, KIAA0319L, PRKCSH, SSR1, NRCAM, APP, HMCN1, GRIN2B, SERPINE2, CTGF, LTB4R, PLOD3, CD46, ATF6B, CFH, PDGFC, RPN2, ASPH, EGFR, PLD3, TOR1AIP2, BSG, SLC12A9, PTPRG, PLXNB2, HLA-A, STIM2, HLA-B, NCAM1, COL1A2, SLC38A1, COL1A1, DST, GLG1, FGFR1, SLC2A11, SLC38A2, CCL2, PTK7, PPT1, CALR, VIT, EXTL2, SERPINH1, ITGB1, CALU, CEPT1, LGALS3BP, MIA3, ITGB8, TM…	1037	4234	20063	0.648865	1	1	100
Annotation Cluster 166	Enrichment Score: 2.0577247235872422E-6
Category	Term	Count	%	PValue	Genes	List Total	Pop Hits	Pop Total	Fold Enrichment	Bonferroni	Benjamini	FDR
UP_KEYWORDS	Membrane	322	30.0935	0.999972	C15ORF48, TGOLN2, LDHA, RAD51B, S100A6, HM13, CADM1, RPL15, VPS53, KIAA0319L, ANKLE2, C14ORF2, SSR1, ATP2B1, GOLGA8B, APP, GRIN2B, VPS13C, LTB4R, CD46, PLOD3, DHX36, OGT, GNG5, GOLGA8A, AUP1, PLD3, DBNL, BSG, SLC12A9, PTPRG, MPDZ, UBR4, SYNJ2BP, MARK3, PCLO, NKTR, GCC2, NAPEPLD, CATSPER2, RPS14, UBR5, PEX26, ACAP2, LRCH3, ORAI2, GLG1, ALDOA, SLC2A11, SLC35E2B, RIC3, MYO9A, SFXN5, CALU, MACF1, CEP…	1047	7494	20581	0.844621	1	1	100
UP_KEYWORDS	Transmembrane helix	217	20.2804	1	C15ORF48, TGOLN2, RAD51B, LDHA, HM13, CADM1, KIAA0319L, ANKLE2, C14ORF2, SSR1, ATP2B1, APP, GRIN2B, LTB4R, CD46, DHX36, AUP1, PLD3, BSG, SLC12A9, PTPRG, UBR4, SYNJ2BP, PCLO, CATSPER2, RPS14, UBR5, PEX26, LRCH3, ALDOA, ORAI2, GLG1, SLC2A11, SLC35E2B, RIC3, MYO9A, SFXN5, MACF1, CEP170, STX16, TMED10, FAM162A, ZC3H13, LAPTM4A, SPTSSA, S100A10, CD63, NOTCH2, SEMA6A, EPHA4, IFI27, SYNE2, RTN4, SPG7, O…	1047	5634	20581	0.757116	1	1	100
UP_KEYWORDS	Transmembrane	217	20.2804	1	C15ORF48, TGOLN2, RAD51B, LDHA, HM13, CADM1, KIAA0319L, ANKLE2, C14ORF2, SSR1, ATP2B1, APP, GRIN2B, LTB4R, CD46, DHX36, AUP1, PLD3, BSG, SLC12A9, PTPRG, UBR4, SYNJ2BP, PCLO, CATSPER2, RPS14, UBR5, PEX26, LRCH3, ALDOA, ORAI2, GLG1, SLC2A11, SLC35E2B, RIC3, MYO9A, SFXN5, MACF1, CEP170, STX16, TMED10, FAM162A, ZC3H13, LAPTM4A, SPTSSA, S100A10, CD63, NOTCH2, SEMA6A, EPHA4, IFI27, SYNE2, RTN4, SPG7, O…	1047	5651	20581	0.754839	1	1	100
UP_SEQ_FEATURE	topological domain:Cytoplasmic	120	11.215	1	TGOLN2, HM13, CADM1, KIAA0319L, SSR1, ATP2B1, NRCAM, APP, GRIN2B, LTB4R, CD46, ATF6B, RPN2, ASPH, DDOST, SCAMP4, AUP1, PLD3, EGFR, BSG, SLC12A9, PTPRG, PLXNB2, HLA-A, STIM2, HLA-B, SYNJ2BP, NCAM1, CATSPER2, PEX26, VAMP2, SLC38A1, SEC61G, GLG1, FGFR1, CAV1, SLC2A11, SLC38A2, PTK7, RIC3, LMAN1, ITGB1, EXTL2, MIA3, TOMM7, ITGB8, STX16, TMED10, LRFN5, SEC61A1, SLC30A7, MRC2, SPPL2B, GOLIM4, SPTSSA, S…	1037	3456	20063	0.671776	1	1	100
UP_SEQ_FEATURE	transmembrane region	181	16.9159	1	TGOLN2, HM13, CADM1, KIAA0319L, ANKLE2, SSR1, ATP2B1, NRCAM, APP, UQCR11, GRIN2B, MCOLN3, LTB4R, CD46, ATF6B, ASPH, RPN2, LEPROT, DDOST, SCAMP4, AUP1, EGFR, TOR1AIP2, PLD3, BSG, SLC12A9, PTPRG, PLXNB2, HLA-A, STIM2, UBR4, HLA-B, SYNJ2BP, NCAM1, CATSPER2, SLC25A36, PEX26, SLC25A37, SLC38A1, VAMP2, SEC61G, ORAI2, GLG1, GPATCH2L, FGFR1, CAV1, SLC2A11, SLC38A2, HACD3, SLC35E2B, IFITM2, IFITM3, COX7B,…	1037	5056	20063	0.69261	1	1	100
GOTERM_CC_DIRECT	GO:0016021~integral component of membrane	196	18.3178	1	TGOLN2, C15ORF48, RAD51B, LDHA, HM13, CADM1, KIAA0319L, C14ORF2, SSR1, ATP2B1, APP, LTB4R, CD46, DHX36, PLD3, BSG, SLC12A9, PTPRG, UBR4, PCLO, UBR5, RPS14, LRCH3, GLG1, ORAI2, SLC2A11, SLC35E2B, RIC3, MYO9A, SFXN5, MACF1, CEP170, STX16, TMED10, FAM162A, ZC3H13, LAPTM4A, SMAD5, SPTSSA, S100A10, CD63, SEMA6A, EPHA4, IFI27, SYNE2, RTN4, SPG7, ORMDL1, DNAJC10, TMEM161B, BNIP3, OFD1, CHST12, GPX8, EMC…	1000	5163	18224	0.691827	1	1	100
Annotation Cluster 167	Enrichment Score: -0.0
Category	Term	Count	%	PValue	Genes	List Total	Pop Hits	Pop Total	Fold Enrichment	Bonferroni	Benjamini	FDR
GOTERM_BP_DIRECT	GO:0007186~G-protein coupled receptor signaling pathway	7	0.654206	1	CCL2, LTB4R, ADGRV1, IGF2R, ADGRL2, GNG5, CALM2	962	899	16792	0.135914	1	1	100
UP_KEYWORDS	G-protein coupled receptor	3	0.280374	1	LTB4R, ADGRV1, ADGRL2	1047	842	20581	0.0700372	1	1	100
UP_KEYWORDS	Transducer	4	0.373832	1	LTB4R, ADGRV1, ADGRL2, GNG5	1047	899	20581	0.0874621	1	1	100
